# Supplementary material for: ERG signaling in prostate cancer is driven through PRMT5-dependent methylation of the Androgen Receptor
Source: eLife journal article supplement (doi:10.7554/elife.13964), 2016-05-16

# Figure 2--figure supplement 1: AR signature analysis

## Androgen Receptor Activation Gene Signatures: Downregulated by PRMT5

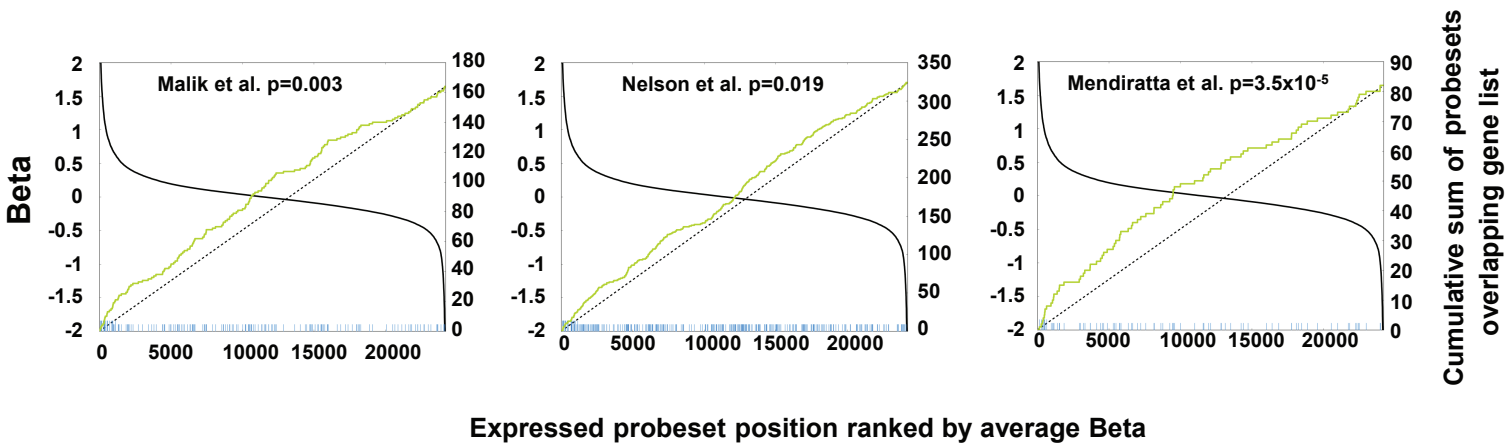

Supplement: supp [file elife-13964-supp-v2.zip]
