# Supplementary material for: ERG signaling in prostate cancer is driven through PRMT5-dependent methylation of the Androgen Receptor
Source: eLife. 2016 May 16;5:e13964. doi: 10.7554/eLife.13964 (PMC4909395; doi:10.7554/eLife.13964)
Supplement: Supplementary file 1. — DOI: http://dx.doi.org/10.7554/eLife.13964.015 [file elife-13964-supp1.xlsx]

## Sheet: Sheet1
Supplementary file 1: shRNA screen hits selective to ERG-positive prostate cancer
shRNA screen hits following a cutoff of:
RSA<10-5 in VCaP shRNA screen and
RSA >10-5 in 22Rv1 shRNA screen
In red are all screen hits identified as ERG interactors based on
Mass Spectrometry analysis of an ERG pulldown (Supplemental file 2).
Gene	VCaP RSA	22Rv1 RSA
AR	-10.5437	-1.41089
ARID1A	-5.41772	-0.873141
ARID5B	-8.28893	-2.60248
ATRX	-5.58698	-1.88718
AURKB	-8.74064	-2.84888
CDC42	-6.47796	-1.80585
CSNK1A1	-5.35743	-4.47276
CTCF	-5.26624	-4.36395
EHMT1	-7.05085	-2.61972
EIF4E	-9.59948	-3.97193
EP300	-16.7022	-1.09183
HDAC1	-5.74816	-0.388851
HMGN2	-5.2443	-2.72549
INO80	-6.04385	-1.20178
KDM1A	-6.18092	-1.75855
KDM2B	-5.01288	-0.771918
MBD2	-5.32053	-3.08913
NCOA2	-9.69955	-1.61917
NCOA6	-5.06615	-2.40479
NCOR2	-5.74745	-3.41752
NFRKB	-5.28967	-0.69967
PLK1	-5.50027	-2.52278
PRMT5	-6.38887	-2.40634
RCOR1	-6.87692	-3.73714
RING1	-6.17046	-0.391037
RNF20	-5.38053	-0.379963
RNF40	-6.21184	-2.33879
SMARCB1	-7.53745	-2.34564
SMARCE1	-6.69065	-3.67918
SUPT16H	-7.87451	-4.29864
TRIP12	-5.90378	-2.59383
TRRAP	-9.76121	-3.80474
Data for entire shRNA library (648 genes)
Gene	VCaP RSA	22Rv1 RSA
2016-03-05	-0.395678	-2.09788
A1CF	-1.66297	-1.00951
ACTA2	-1.47846	-1.97552
ACTL6A	-2.91603	-1.14917
ACTL6B	-0.753051	-3.58539
ACTR5	-3.97645	-0.378596
ACTR6	-1.59512	-1.79564
ACTR8	-0.92153	-0.611208
ACVR1	-0.936291	-1.97906
ACVR1B	-0.576054	-1.46297
ACVR2A	-0.0210972	-2.57602
ACVR2B	-0.55656	-1.26469
ACVRL1	-0.636118	-0.973256
ADAM23	-0.666064	-1.22595
ADAR	-1.60246	-4.86555
ADARB1	-1.90428	-0.91851
AICDA	-1.0063	-0.614265
AIRE	-1.87222	-0.593601
AKAP1	-0.697856	-0.840568
AR	-10.5437	-1.41089
ARID1A	-5.41772	-0.873141
ARID1B	-0.136963	-11.405
ARID2	-1.38148	-2.27566
ARID3A	-2.0489	-1.43678
ARID3B	-2.23606	-1.98025
ARID3C	-1.05953	-0.614196
ARID4A	-0.950137	-0.469738
ARID4B	-0.38713	-1.27825
ARID5A	-0.529712	-0.874293
ARID5B	-8.28893	-2.60248
ASF1A	-1.09792	-1.90314
ASF1B	-1.13249	-0.467996
ASH1L	-2.90124	-1.24352
ASH2L	-1.62117	-1.18959
ASXL1	-0.643175	-1.67893
ASXL2	-1.68134	-1.37514
ASXL3	-1.14504	-1.37876
ATAD2	-1.49134	-0.506191
ATAD2B	-0.683301	-0.592335
ATAT1	-1.19749	-0.790428
ATF2	-1.62468	-1.53942
ATF3	-1.38962	-0.97183
ATR	-4.7229	-3.57029
ATRX	-5.58698	-1.88718
AURKB	-8.74064	-2.84888
BAZ1A	-0.617399	-0.366976
BAZ1B	-1.14684	-0.896443
BAZ2A	-1.52248	-2.17415
BAZ2B	-0.746438	-1.12425
BCDIN3D	-1.23251	-1.27266
BCL6	-2.09017	-1.48324
BMI1	-0.168946	-0.785386
BMP2	-0.471926	-1.36645
BMP4	-0.891755	-0.775414
BMPR1A	-0.821359	-1.69376
BMPR1B	-0.138422	-1.19866
BMPR2	-1.66626	-3.64254
BPTF	-3.36879	-1.79149
BRAF	-0.980159	-3.45398
BRCA1	-2.95044	-4.32302
BRD1	-0.145606	-0.62225
BRD2	-1.17292	-2.47381
BRD3	-0.298131	-0.18214
BRD4	-17.4063	-9.83788
BRD7	-3.23848	-2.59739
BRD8	-0.898106	-0.666401
BRD9	-0.820683	-2.60341
BRDT	-1.62939	-1.05491
BRMS1	-2.41697	-0.774971
BRMS1L	-1.21124	-1.01637
BRPF1	-3.14331	-2.39914
BRPF3	-2.3687	-4.09324
BRWD1	-0.152272	-1.42469
BRWD3	-0.934392	-0.824248
BTD	-0.670637	-2.42767
C14orf169	-1.11797	-0.990064
CARM1	-1.66106	-0.251845
CBX1	-0.657194	-0.330453
CBX2	-0.884327	-2.39268
CBX3	-0.934149	-1.83627
CBX4	-1.04315	-0.512389
CBX5	-1.05899	-1.13861
CBX6	-1.32525	-1.7554
CBX7	-1.11076	-0.519967
CBX8	-0.471006	-1.11506
CCDC101	-1.56822	-0.189619
CCDC79	-0.475317	-0.418948
CDC42	-6.47796	-1.80585
CDH1	-1.60466	-2.52173
CDH2	-0.356895	-0.441934
CDK1	-1.83056	-0.29402
CDK9	-0.963211	-1.3287
CDY1	-1.56073	-1.46511
CDY1B	-1.58037	-3.45707
CDY2A	-0.747465	-0.945992
CDYL	-0.85494	-1.74759
CDYL2	-0.491194	-0.429247
CEBPA	-1.51318	-1.549
CEBPB	-0.400865	-0.404192
CEBPG	-1.44524	-1.55924
CECR2	-3.90533	-1.26565
CENPA	-1.45485	-1.16685
CENPW	-4.25653	-0.548476
CHAF1A	-13.7628	-9.69886
CHAF1B	-1.24284	-1.95499
CHD1	-1.00827	-2.47626
CHD2	-2.12671	-2.11043
CHD3	-4.71769	-6.64145
CHD4	-19.8856	-24.8481
CHD5	-1.69509	-1.27244
CHD6	-0.297704	-0.0657341
CHD7	-0.959597	-0.422394
CHD8	-1.73546	-0.875493
CHD9	-1.00609	-0.495011
CHRAC1	-0.644987	-1.34219
CHRD	-1.68006	-1.08429
CLOCK	-0.152448	-0.764286
CREBBP	-1.82462	-0.16288
CSNK1A1	-5.35743	-4.47276
CSNK2A1	-1.36759	-1.17529
CTBP1	-1.13634	-0.799239
CTBP2	-1.32841	-0.877341
CTCF	-5.26624	-4.36395
CTCFL	-0.443507	-1.32997
CTNNB1	-4.48699	-0.0868891
CXXC1	-3.92205	-4.75641
DDX58	-1.73078	-0.765192
DICER1	-2.4799	-0.708015
DIDO1	-0.0938782	-0.614188
DIMT1	-2.49695	-6.77651
DMAP1	-1.06598	-1.57403
DMTF1	-2.20249	-1.17364
DNAJC1	-0.383069	-0.929234
DNAJC2	-3.26709	-2.3097
DNMT1	-4.89638	-5.06141
DNMT3A	-0.978021	-1.03658
DNMT3B	-1.49713	-0.848401
DNMT3L	-0.840726	-0.828045
DOT1L	-0.315148	-0.222565
DPF1	-0.417057	-1.17288
DPF2	-0.356738	-1.3029
DPF3	-0.946174	-0.686629
DROSHA	-1.45584	-2.27917
EED	-5.5228	-6.38993
EGFR	-0.145728	-0.324684
EHMT1	-7.05085	-2.61972
EHMT2	-2.87896	-0.984368
EIF4A1	-7.76463	-11.3716
EIF4E	-9.59948	-3.97193
ELP3	-1.7672	-1.23274
EP300	-16.7022	-1.09183
EP400	-3.35143	-1.97235
EPC1	-1.01977	-1.6348
ESR1	-0.754737	-0.646792
EWSR1	-9.597	-10.0057
EZH1	-2.22699	-0.965572
EZH2	-8.33337	-5.95411
FBXO10	-1.20289	-3.48538
FBXO11	-0.595106	-0.447588
FLI1	-0.97303	-1.5322
FLT3	-2.7652	-1.08998
FMR1	-0.335605	-0.190295
FN1	-0.76122	-1.14329
FOXC2	-1.03112	-0.402109
FOXP3	-1.80182	-0.220002
FST	-0.907116	-2.70323
FTO	-0.473174	-0.674734
FTSJ2	-1.47206	-1.54511
FTSJ3	-2.54649	-4.60588
FTSJD2	-1.0297	-1.67702
FXR2	-0.453256	-0.770598
G2E3	-0.366416	-0.16955
GATA1	-2.01183	-3.19901
GATA3	-3.58871	-1.75678
GLYR1	-0.963131	-2.07327
GPR132	-1.55198	-0.716611
GSC	-1.24267	-2.37786
GSG2	-1.1418	-0.983214
GTF3C4	-1.98649	-0.647347
H2AFX	-0.820661	-0.736014
H2AFY	-0.627175	-1.90234
H2AFZ	-2.94988	-0.299492
HACE1	-0.761372	-2.55994
HAT1	-0.63516	-1.98347
HCFC1	-1.68791	-3.62679
HDAC1	-5.74816	-0.388851
HDAC10	-0.619899	-0.364328
HDAC11	-1.03702	-0.396827
HDAC2	-0.759284	-1.32112
HDAC3	-1.43379	-0.960417
HDAC4	-1.04106	-0.588841
HDAC5	-0.530806	-2.62962
HDAC6	-0.241528	-0.279011
HDAC7	-0.221896	-1.08531
HDAC8	-0.622036	-0.715646
HDAC9	-3.21857	-2.14006
HDGF	-0.689615	-0.828565
HDGFL1	-1.43296	-1.06578
HDGFRP2	-0.97929	-0.829386
HDGFRP3	-0.59351	-1.68658
HECTD1	-4.28097	-1.05164
HECTD2	-0.515773	-0.251662
HECTD3	-1.98469	-1.31588
HECTD4	-0.714997	-2.48521
HECW1	-0.844522	-2.11525
HECW2	-2.49863	-0.538999
HELLS	-1.27225	-0.978471
HENMT1	-0.154188	-0.126605
HERC1	-0.153732	-0.447765
HERC2	-0.72235	-0.634716
HERC3	-1.61741	-0.646527
HERC4	-1.0629	-0.730883
HERC5	-0.461495	-1.6565
HERC6	-1.28028	-1.31777
HIF1AN	-0.501012	-1.59778
HIST1H1A	-0.122814	-1.13583
HIST1H1B	-1.01951	-0.994456
HIST1H1C	-0.873589	-0.298131
HIST1H1D	-1.25899	-1.24122
HIST1H1E	-3.03254	-1.85008
HIST1H1T	-0.490362	-0.399112
HIST3H3	-3.65309	-1.38553
HLTF	-2.79893	-1.79328
HMG20B	-2.65448	-0.849696
HMGA1	-0.89007	-0.378197
HMGA2	-1.39977	-0.477133
HMGB1	-1.27773	-1.75457
HMGB2	-0.662626	-1.3122
HMGB3	-0.972323	-0.48211
HMGB4	-1.59006	-2.09922
HMGN1	-1.8432	-0.303127
HMGN2	-5.2443	-2.72549
HMGN3	-0.192674	-0.691702
HMGN5	-0.94778	-1.42964
HR	-1.31841	-1.52912
HRAS	-1.73427	-1.09572
HSPBAP1	-0.847589	-0.111827
HUWE1	-11.986	-8.36889
ID1	-0.464929	-0.840752
ID2	-4.11933	-2.41159
IDH1	-2.07035	-3.52283
IDH2	-0.88766	-0.391254
IKZF2	-2.20649	-4.01138
IKZF4	-0.629775	-0.901037
ING1	-0.679406	-0.752264
ING2	-1.32545	-0.452364
ING3	-1.68089	-1.58133
ING4	-2.41867	-1.27873
ING5	-0.868615	-0.535823
INO80	-6.04385	-1.20178
INO80B	-1.87336	-1.50097
INO80C	-0.494077	-0.34011
INO80D	-2.28886	-0.0931351
INO80E	-1.73631	-0.508655
INTS12	-2.73169	-2.79234
IRF3	-0.619973	-0.67406
IRF4	-0.474548	-0.505125
IRF5	-1.88031	-2.1169
IRF7	-0.833009	-0.376003
ITCH	-0.96808	-0.522938
JAK2	-0.437672	-0.218049
JARID2	-2.31727	-2.16456
JHDM1D	-1.35093	-0.229627
JMJD1C	-0.879379	-0.946363
JMJD4	-1.05273	-0.810271
JMJD6	-1.40348	-1.69037
JMJD7	-2.53251	-0.538207
JMJD8	-2.01552	-1.44612
KAT2A	-1.72037	-1.03197
KAT2B	-0.52617	-0.990721
KAT5	-0.320596	-0.687527
KAT6A	-3.39828	-0.540176
KAT6B	-1.039	-1.20647
KAT7	-0.577084	-1.13124
KAT8	-1.36407	-1.21708
KDM1A	-6.18092	-1.75855
KDM1B	-1.39058	-3.07009
KDM2A	-10.1265	-14.3993
KDM2B	-5.01288	-0.771918
KDM3A	-0.877304	-0.602853
KDM3B	-0.583934	-0.38973
KDM4A	-1.41412	-2.21376
KDM4B	-2.47374	-0.489915
KDM4C	-3.70966	-3.23392
KDM4D	-1.30992	-1.0673
KDM4E	-1.74975	-1.83576
KDM5A	-0.289599	-1.61361
KDM5B	-0.390963	-0.501912
KDM5C	-1.24716	-2.92715
KDM5D	-1.94536	-1.5548
KDM6A	-4.61035	-1.25899
KDM6B	-3.79716	-2.00284
KDM8	-1.02487	-1.08425
KIAA0317	-1.05314	-0.609182
KIAA2026	-0.142363	-0.191155
KLF8	-1.01711	-0.27746
KRAS	-1.50048	-1.60436
L3MBTL1	-1.09088	-0.553633
L3MBTL2	-1.901	-3.02286
L3MBTL3	-0.264135	-1.07511
L3MBTL4	-1.57372	-2.53264
LBR	-0.786461	-0.870628
LEFTY1	-0.436707	-0.634885
LRP11	-1.30651	-1.34808
Luc	-0.200439	-0.0408417
MAF	-0.966666	-0.689959
MAVS	-0.474974	-0.498097
MBD1	-0.625814	-0.232476
MBD2	-5.32053	-3.08913
MBD3	-2.51493	-0.84478
MBD3L1	-1.08557	-0.279628
MBD3L2	-1.36309	-0.552548
MBD3L3	-0.58227	-0.453386
MBD4	-2.03987	-0.570235
MBD5	-1.81328	-0.660301
MBD6	-0.541485	-0.196535
MBTD1	-2.24607	-2.44025
MCRS1	-2.13581	-0.165986
MECOM	-1.54905	-3.18822
MEPCE	-0.86445	-0.303949
METTL1	-0.3622	-0.522728
METTL14	-0.727534	-0.708412
METTL2A	-1.13093	-1.88584
METTL3	-1.17221	-1.9564
MINA	-0.712267	-1.64649
MLL	-3.3687	-1.6706
MLL2	-2.37721	-3.71266
MLL3	-1.34345	-1.41102
MLL4	-1.5227	-2.02994
MLL5	-1.69937	-3.22906
MLLT10	-2.40625	-0.470111
MLLT6	-1.39687	-1.13909
MORF4L1	-0.334563	-0.415254
MPHOSPH8	-0.243112	-1.34515
MSH6	-1.20022	-0.627764
MST1	-1.15051	-0.652749
MTA1	-4.29237	-0.855304
MTA2	-1.05737	-1.1846
MTAP	-2.38165	-1.09705
MTF2	-0.515144	-2.18639
MTOR	-2.35636	-8.24172
MUM1	-0.400481	-0.74298
MXI1	-0.225742	-0.985383
MYB	-0.476278	-0.598454
MYBL1	-1.41304	-0.704079
MYBL2	-13.6783	-7.16879
MYC	-1.30131	-1.65062
MYCL1	-1.60677	-1.11818
MYCN	-0.338999	-0.202469
MYD88	-1.31316	-1.25931
MYSM1	-0.350595	-1.16915
NAB2	-2.15835	-0.693459
NAMPT	-1.24612	-1.62647
NCOA1	-0.872388	-1.33104
NCOA2	-9.69955	-1.61917
NCOA3	-1.24266	-0.479357
NCOA4	-1.02867	-1.83114
NCOA5	-0.77345	-1.00057
NCOA6	-5.06615	-2.40479
NCOR1	-0.559078	-3.58858
NCOR2	-5.74745	-3.41752
NEDD4	-0.244065	-0.0623783
NEDD4L	-0.655489	-1.90778
NFKB1	-0.288784	-1.57233
NFKB2	-0.653469	-0.848801
NFRKB	-5.28967	-0.69967
NOG	-0.914492	-0.200698
NR1H2	-0.53569	-0.520445
NR1H3	-2.23488	-1.47015
NR2C2	-3.07909	-1.34766
NR4A1	-1.29786	-0.548932
NR4A2	-0.9677	-0.894642
NR4A3	-1.41379	-2.76234
NRAS	-1.88392	-1.81578
NRIP1	-0.699069	-0.908585
NSD1	-4.15676	-1.07171
NSUN2	-0.662278	-1.21
OGT	-4.30113	-1.2705
P2RY6	-0.657636	-0.891099
PARP1	-0.366634	-1.49991
PARP2	-0.680571	-0.357421
PARP3	-2.32996	-0.913135
PARP4	-0.560314	-1.67448
PARP8	-0.291229	-0.910196
PBRM1	-1.53366	-2.39835
PCGF1	-2.41389	-0.418094
PCGF2	-0.111691	-0.72723
PCGF5	-1.10724	-1.54752
PCGF6	-0.0962488	-0.207534
PELP1	-2.5274	-1.73821
PHC1	-2.06642	-4.1026
PHC2	-1.39469	-0.232137
PHC3	-0.347586	-1.44725
PHF1	-0.585511	-0.716688
PHF10	-0.668416	-0.888275
PHF11	-1.65345	-0.736253
PHF12	-1.09751	-3.79839
PHF13	-1.31084	-1.07049
PHF14	-1.04957	-0.48532
PHF15	-1.73269	-1.18243
PHF16	-0.149775	-0.539361
PHF17	-1.22863	-1.63746
PHF19	-1.36302	-2.68137
PHF2	-0.628152	-0.683433
PHF20	-4.47634	-2.55962
PHF20L1	-0.287249	-0.622943
PHF21A	-0.648609	-1.30181
PHF21B	-0.597535	-1.02061
PHF23	-2.67139	-2.60707
PHF3	-0.638767	-0.753316
PHF5A	-19.3449	-20.3308
PHF6	-0.244951	-0.660531
PHF7	-2.27888	-2.69464
PHF8	-4.25591	-1.20727
PHIP	-3.66698	-0.867964
PHRF1	-2.4462	-3.08553
PIM1	-4.29323	-0.681267
PLK1	-5.50027	-2.52278
POLR2A	-16.4542	-6.90934
PRDM1	-0.520656	-1.36624
PRDM10	-0.517211	-0.625503
PRDM11	-0.43636	-0.109228
PRDM12	-2.65403	-1.06735
PRDM13	-0.499996	-1.37606
PRDM14	-1.02758	-1.17053
PRDM15	-0.389501	-0.482797
PRDM16	-0.959479	-1.59293
PRDM2	-1.29928	-1.02964
PRDM4	-2.2688	-2.47432
PRDM5	-1.06478	-1.029
PRDM6	-0.563447	-0.310242
PRDM7	-1.64529	-2.36326
PRDM8	-0.993123	-0.642897
PRDM9	-0.948293	-1.68554
PRKDC	-1.32929	-4.17312
PRMT1	-9.83906	-5.42343
PRMT10	-1.08311	-0.688628
PRMT2	-1.13493	-1.35819
PRMT3	-0.15045	-0.439533
PRMT5	-6.38887	-2.40634
PRMT6	-0.674425	-0.95677
PRMT7	-0.435655	-1.29137
PRMT8	-0.242743	-1.37699
PSIP1	-1.30146	-1.50362
PSMA3	-20.8142	-20.7495
PTEN	-0.1721	-0.0502288
PWWP2A	-0.633344	-0.758549
PWWP2B	-0.375561	-2.48764
PYGO1	-1.11327	-0.866679
PYGO2	-1.92645	-1.42271
RAC1	-0.665439	-0.804108
RAG2	-1.69473	-2.34758
RAI1	-0.903261	-0.781708
RB1	-0.364735	-0.0417941
RBBP4	-4.67324	-3.31601
RBBP5	-1.00404	-0.944551
RBBP7	-0.220747	-0.0281102
RCOR1	-6.87692	-3.73714
RCOR2	-1.23722	-4.08386
RCOR3	-0.0690182	-0.31964
REL	-0.646527	-0.72235
RELA	-1.59773	-1.57007
RELB	-0.531503	-0.465961
REST	-0.622943	-1.19392
RING1	-6.17046	-0.391037
RIPK2	-0.640281	-0.666668
RLIM	-2.4881	-2.20645
RNF17	-0.359942	-0.512965
RNF2	-0.489706	-0.684503
RNF20	-5.38053	-0.379963
RNF31	-0.471802	-0.927006
RNF40	-6.21184	-2.33879
RNMT	-1.57947	-1.11033
RORA	-0.677094	-0.359935
RORC	-1.78331	-1.55652
RPH3A	-0.796405	-0.869714
RPS6KA4	-0.25193	-0.663789
RPS6KA5	-1.58877	-0.600776
RSF1	-1.1579	-0.90474
RUNX1	-1.22097	-2.1035
RUVBL1	-9.15316	-7.9577
RUVBL2	-8.40483	-9.36504
SAP130	-4.38037	-4.49844
SAP30	-1.22164	-1.4982
SAP30L	-0.6271	-0.859551
SCMH1	-1.23312	-0.266529
SCML1	-1.50463	-0.49449
SCML2	-1.04827	-1.40463
SERPINE1	-0.48211	-0.207206
SETBP1	-1.2993	-0.876401
SETD1A	-0.272298	-1.93939
SETD1B	-0.425135	-0.671533
SETD2	-0.0267967	-1.51103
SETD3	-1.0439	-0.415543
SETD4	-0.901519	-0.27026
SETD5	-2.00757	-2.00904
SETD6	-0.319118	-0.164455
SETD7	-0.905415	-1.05273
SETD8	-0.298811	-0.560196
SETDB1	-0.435021	-0.188508
SETDB2	-0.371774	-0.995678
SETMAR	-1.38455	-0.846923
SFMBT1	-0.63265	-0.371762
SFMBT2	-0.767305	-0.683972
SFPQ	-24.506	-9.99904
SHPRH	-1.9271	-0.693823
SIN3A	-4.29518	-3.06268
SIRT1	-0.378596	-0.617384
SIRT2	-0.514455	-0.692586
SIRT3	-0.88989	-1.25648
SIRT4	-1.80021	-1.12976
SIRT5	-0.723221	-0.790031
SIRT6	-2.3013	-0.532097
SIRT7	-0.28521	-0.445214
SMAD1	-0.206363	-0.571724
SMAD2	-1.44556	-0.936291
SMAD3	-0.579385	-0.486369
SMAD4	-0.444523	-2.5249
SMAD5	-0.394508	-1.90733
SMAD6	-0.795308	-0.677074
SMAD7	-2.93201	-1.02107
SMAD9	-0.111369	-0.997723
SMARCA1	-0.728337	-1.28386
SMARCA2	-2.91984	-1.70594
SMARCA4	-4.51685	-2.05726
SMARCA5	-12.7629	-8.40385
SMARCAD1	-0.98948	-3.71805
SMARCAL1	-1.14754	-0.614627
SMARCB1	-7.53745	-2.34564
SMARCC1	-2.45495	-2.23327
SMARCC2	-0.619478	-1.28538
SMARCD1	-0.410749	-1.80607
SMARCD2	-0.749056	-0.838463
SMARCD3	-1.21447	-0.748524
SMARCE1	-6.69065	-3.67918
SMN1	-3.06205	-7.57018
SMNDC1	-3.10598	-3.76725
SMURF1	-2.50249	-1.64596
SMURF2	-4.28603	-2.9237
SMYD1	-0.287852	-0.108281
SMYD2	-1.47604	-1.80008
SMYD3	-0.454998	-0.532913
SMYD4	-0.467677	-1.27194
SMYD5	-0.595931	-2.17711
SNAI1	-1.69585	-1.90644
SNAI2	-0.530293	-0.895643
SNAP29	-0.297367	-0.379562
SNAPC4	-0.122141	-0.498619
SND1	-0.340057	-1.21176
SOST	-0.568397	-0.670193
SOX9	-0.260075	-1.70281
SP100	-0.431989	-1.76789
SP110	-0.904559	-1.25235
SP140	-2.06682	-2.86611
SP140L	-0.502165	-0.64501
SPEN	-0.616889	-1.47085
SRCAP	-2.72756	-1.21473
SRM	-1.86963	-0.739473
SSRP1	-3.13494	-3.44169
STAT1	-0.372974	-0.403934
STAT3	-0.735767	-1.47928
STAT4	-0.7844	-0.873589
STK31	-0.271499	-0.662768
STK4	-0.309131	-0.421983
SUDS3	-4.38049	-3.2084
SUPT16H	-7.87451	-4.29864
SUV39H1	-1.86775	-1.13318
SUV39H2	-0.387402	-0.434732
SUV420H1	-0.0405501	-0.302002
SUV420H2	-1.07611	-4.08333
SUZ12	-6.4389	-5.76137
TADA2A	-1.2515	-1.91699
TADA2B	-0.606315	-0.504265
TAF1	-1.23034	-1.61705
TAF1L	-1.55466	-2.43576
TAF3	-3.07489	-1.15995
TBX21	-0.164949	-1.31476
TCF19	-1.90778	-2.37091
TCF20	-1.02419	-1.4286
TCF3	-0.616307	-0.673618
TCF4	-0.650099	-1.34165
TDRD1	-2.16108	-1.10267
TDRD10	-2.608	-1.7393
TDRD12	-1.26664	-1.10728
TDRD3	-1.93162	-0.416913
TDRD5	-0.302594	-2.39396
TDRD6	-0.548066	-0.902102
TDRD7	-3.85766	-1.36408
TDRD9	-0.506191	-0.650153
TDRKH	-0.293165	-0.513598
TELO2	-0.860902	-0.342409
TERF1	-4.96893	-3.63785
TERF2	-1.7012	-1.474
TERF2IP	-0.783702	-2.07931
TERT	-2.10316	-1.93342
TET1	-0.706417	-0.802932
TET2	-4.16658	-2.16517
TET3	-1.42116	-0.354124
TFPT	-1.02283	-0.693776
TGFB1	-4.47424	-3.41488
TGFBR1	-1.40268	-0.754365
TGFBR2	-0.936972	-1.21978
TGS1	-1.46841	-2.33446
TICAM1	-0.720931	-1.52832
TMLHE	-1.13005	-0.839762
TNFAIP3	-0.697875	-1.02281
TNFRSF1A	-1.88193	-0.894703
TOPORS	-1.01835	-2.92266
TP53	-0.092136	-0.0475463
TP53BP1	-0.90545	-1.34813
TRADD	-0.470346	-0.570648
TRDMT1	-0.0368202	-0.990378
TRIM24	-0.640881	-0.491647
TRIM28	-2.8236	-2.52807
TRIM33	-0.937829	-1.02591
TRIM66	-1.23526	-2.09312
TRIP12	-5.90378	-2.59383
TRRAP	-9.76121	-3.80474
TWIST1	-2.73889	-1.91766
TWIST2	-0.607008	-0.528599
TYW5	-1.94811	-2.06876
UBE2E1	-1.73704	-0.725836
UBE3A	-0.218817	-1.32885
UBE3B	-2.98173	-0.991782
UBE3C	-0.127529	-0.293665
UBR7	-0.279903	-1.65048
UCHL5	-3.02588	-4.17016
UHRF1	-1.22479	-1.39742
UHRF2	-1.02349	-0.599729
UTY	-0.758356	-1.38993
VIM	-0.755845	-2.04182
VPRBP	-0.546814	-1.07769
VPS72	-1.42703	-3.37975
WDR5	-1.47719	-0.765387
WHSC1	-2.89116	-1.13935
WHSC1L1	-3.18638	-1.59572
WHSC2	-1.6854	-1.64694
WWP1	-1.79149	-0.666982
XBP1	-0.586963	-0.63265
YEATS4	-0.988705	-0.773749
ZCWPW1	-1.09851	-0.608036
ZCWPW2	-1.08372	-1.10433
ZEB1	-1.70318	-1.43466
ZEB2	-0.923278	-0.540198
ZGPAT	-1.15147	-0.629876
ZMYND11	-4.07677	-0.653953
ZMYND8	-1.04258	-1.16283
ZZZ3	-0.430477	-2.03492
