# Supplementary material for: ERG signaling in prostate cancer is driven through PRMT5-dependent methylation of the Androgen Receptor
Source: eLife. 2016 May 16;5:e13964. doi: 10.7554/eLife.13964 (PMC4909395; doi:10.7554/eLife.13964)
Supplement: Supplementary file 2. — DOI: http://dx.doi.org/10.7554/eLife.13964.016 [file elife-13964-supp2.xlsx]

## Sheet: Legend
Supplementary Table Legend:
1. PROTEIN_AC: Representative Internationl Protein Index (IPI) protein accession number
2. GENE_NAME: Entrez gene name associated with IPI protein accession number
3. DESCRIPTION: Protein description associated with IPI protein accession number
4. PROTEIN_PROBABILITY: ProteinProphet-derived protein probability
5. SPECTRUM_COUNT: Number of total redundant Mascot-derived peptide spectrum matches for this protein
6. UNIQUE_PEP_COUNT: Number of unique peptide sequences matched to this protein

## Sheet: Mass spectrometry data
Supplementary file 2: List of candidate ERG protein interactors identified by Mass Spectrometry analysis of an ERG pulldown
1. PROTEIN_AC: Representative Internationl Protein Index (IPI) protein accession number
2. GENE_NAME: Entrez gene name associated with IPI protein accession number
3. DESCRIPTION: Protein description associated with IPI protein accession number
4. PROTEIN_PROBABILITY: ProteinProphet-derived protein probability
5. SPECTRUM_COUNT: Number of total redundant Mascot-derived peptide spectrum matches
	for this protein
6. UNIQUE_PEP_COUNT: Number of unique peptide sequences matched to this protein
In red are all interactors that were also hits in the shRNA screen (from Supplemental file 1).
			PROTEIN_	SPECTRUM_	UNIQUE_PEP_
PROTEIN_AC	GENE_NAME	DESCRIPTION	PROBABILITY	COUNT	COUNT
IPI00438229.2	TRIM28	Isoform 1 of Transcription intermediary factor 1-beta	1	463	40
IPI00011654.2	TUBB	Tubulin beta chain	1	350	32
IPI00007752.1	TUBB2C	Tubulin beta-2C chain	1	288	29
IPI00013475.1	TUBB2A	Tubulin beta-2A chain	1	265	28
IPI00003865.1	HSPA8	Isoform 1 of Heat shock cognate 71 kDa protein	1	263	43
IPI00844215.1	SPTAN1	Isoform 1 of Spectrin alpha chain: brain	1	259	97
IPI00218343.4	TUBA1C	Tubulin alpha-1C chain	1	231	34
IPI00007765.5	HSPA9	Stress-70 protein: mitochondrial	1	228	40
IPI00023598.2	TUBB4	Tubulin beta-4 chain	0.9999	222	21
IPI00026781.2	FASN	Fatty acid synthase	1	190	77
IPI00477536.3	FLNB	filamin B isoform 3	1	184	78
IPI00900293.1	FLNB	filamin B isoform 1	0.9975	184	78
IPI00007750.1	TUBA4A	Tubulin alpha-4A chain	1	183	27
IPI00784154.1	HSPD1	60 kDa heat shock protein: mitochondrial	1	182	34
IPI00021439.1	ACTB	Actin: cytoplasmic 1	1	174	24
IPI00396485.3	EEF1A1	Elongation factor 1-alpha 1	1	160	22
IPI00296337.2	PRKDC	Isoform 1 of DNA-dependent protein kinase catalytic subunit	1	156	84
IPI00414676.6	HSP90AB1	Heat shock protein HSP 90-beta	1	135	45
IPI00011569.2	ACACA	Isoform 1 of Acetyl-CoA carboxylase 1	1	127	73
IPI00018522.4	PRMT1	HMT1 hnRNP methyltransferase-like 2 isoform 1	1	122	26
IPI00219018.7	GAPDH	Glyceraldehyde-3-phosphate dehydrogenase	1	120	23
IPI00220625.1	AKAP9	Isoform 3 of A-kinase anchor protein 9	1	114	67
IPI00014424.1	EEF1A2	Elongation factor 1-alpha 2	1	113	14
IPI00419585.9	PPIA	Peptidyl-prolyl cis-trans isomerase A	1	112	17
IPI00003362.2	HSPA5	HSPA5 protein	1	111	31
IPI00301263.2	CAD	CAD protein	1	108	58
IPI00019502.3	MYH9	Isoform 1 of Myosin-9	1	107	70
IPI00397526.3	MYH10	Isoform 1 of Myosin-10	1	107	70
IPI00844172.1	MYO6	Myosin	1	103	41
IPI00382470.3	HSP90AA1	Isoform 2 of Heat shock protein HSP 90-alpha	1	103	37
IPI00179330.6	UBB;RPS27A;UBC	ubiquitin and ribosomal protein S27a precursor	1	98	9
IPI00024067.4	CLTC	Isoform 1 of Clathrin heavy chain 1	1	97	53
IPI00217223.1	PAICS	Multifunctional protein ADE2	1	95	25
IPI00027230.3	HSP90B1	Endoplasmin	1	92	33
IPI00465248.5	ENO1	Isoform alpha-enolase of Alpha-enolase	1	89	28
IPI00009329.2	UTRN	Utrophin	1	85	51
IPI00013976.3	LAMB1	Laminin subunit beta-1	1	81	37
IPI00013894.1	STIP1	Stress-induced-phosphoprotein 1	1	81	26
IPI00554711.3	JUP	Junction plakoglobin	1	77	27
IPI00219217.3	LDHB	L-lactate dehydrogenase B chain	1	74	14
IPI00020984.2	CANX	cDNA FLJ55574: highly similar to Calnexin	1	73	22
IPI00298281.4	LAMC1	Laminin subunit gamma-1	1	72	31
IPI00020557.1	LRP1	Prolow-density lipoprotein receptor-related protein 1	1	71	45
IPI00166010.6	CNOT1	Isoform 1 of CCR4-NOT transcription complex subunit 1	1	71	42
IPI00186290.6	EEF2	Elongation factor 2	1	69	35
IPI00645078.1	UBA1	Ubiquitin-like modifier-activating enzyme 1	1	69	27
IPI00304925.5	HSPA1A;HSPA1B	Heat shock 70 kDa protein 1	1	69	31
IPI00465028.7	RCTPI1;TPI1	triosephosphate isomerase 1 isoform 2	1	68	18
IPI00001159.10	GCN1L1	Translational activator GCN1	1	68	35
IPI00023647.4	UBA6	Isoform 1 of Ubiquitin-like modifier-activating enzyme 6	1	67	33
IPI00473014.5	DSTN	Destrin	1	67	18
IPI00005614.6	SPTBN1	Isoform Long of Spectrin beta chain: brain 1	1	66	49
IPI00006196.3	NUMA1	Isoform 2 of Nuclear mitotic apparatus protein 1	1	64	33
IPI00303476.1	ATP5B	ATP synthase subunit beta: mitochondrial	1	64	20
IPI00217544.4	ERG	Isoform 5 of Transcriptional regulator ERG	0.9649	61	14
IPI00291006.2	MDH2	Malate dehydrogenase: mitochondrial	1	61	15
IPI00479186.7	PKM2	Isoform M2 of Pyruvate kinase isozymes M1/M2	1	59	31
IPI00011937.1	PRDX4	Peroxiredoxin-4	1	58	14
IPI00010796.1	P4HB	Protein disulfide-isomerase	1	58	20
IPI00016006.2	GPHN	Isoform 1 of Gephyrin	1	58	18
IPI00011284.1	COMT	Isoform Membrane-bound of Catechol O-methyltransferase	1	55	20
IPI00444262.3	NCL	cDNA FLJ45706 fis: clone FEBRA2028457: highly similar to Nucleolin	1	55	14
IPI00643920.3	TKT	cDNA FLJ54957: highly similar to Transketolase	1	54	17
IPI00456969.1	DYNC1H1	Cytoplasmic dynein 1 heavy chain 1	1	54	31
IPI00413451.1	SERPINB6	Putative uncharacterized protein DKFZp686I04222	1	53	15
IPI00012011.6	CFL1	Cofilin-1	1	53	17
IPI00289983.3	ACPP	Isoform 2 of Prostatic acid phosphatase	1	52	14
IPI00299402.1	PC	Pyruvate carboxylase: mitochondrial	1	51	32
IPI00001639.2	KPNB1	Importin subunit beta-1	1	51	19
IPI00011416.2	ECH1	Delta(3:5)-Delta(2:4)-dienoyl-CoA isomerase: mitochondrial	1	50	19
IPI00031522.2	HADHA	Trifunctional enzyme subunit alpha: mitochondrial	1	50	24
IPI00000874.1	PRDX1	Peroxiredoxin-1	1	50	15
IPI00291510.3	IMPDH2	Inosine-5'-monophosphate dehydrogenase 2	1	49	18
IPI00022977.1	CKB	Creatine kinase B-type	1	49	14
IPI00013452.10	EPRS	Bifunctional aminoacyl-tRNA synthetase	1	48	27
IPI00025273.1	GART	Isoform Long of Trifunctional purine biosynthetic protein adenosine-3	1	48	25
IPI00063234.1	PRKAR2A	Protein kinase: cAMP-dependent: regulatory: type II: alpha: isoform CRA_b	1	47	17
IPI00478003.1	A2M	Alpha-2-macroglobulin	1	46	7
IPI00012645.1	SPTBN2	Isoform 1 of Spectrin beta chain: brain 2	1	46	42
IPI00015018.1	PPA1	Inorganic pyrophosphatase	1	45	22
IPI00219005.3	FKBP4	FK506-binding protein 4	1	45	24
IPI00022774.3	VCP	Transitional endoplasmic reticulum ATPase	1	45	28
IPI00011200.5	PHGDH	D-3-phosphoglycerate dehydrogenase	1	44	16
IPI00029778.3	TP53BP1	Isoform 1 of Tumor suppressor p53-binding protein 1	1	44	18
IPI00013808.1	ACTN4	Alpha-actinin-4	1	44	29
IPI00016610.2	PCBP1	Poly(rC)-binding protein 1	1	42	10
IPI00298547.3	PARK7	Protein DJ-1	1	41	12
IPI00220299.1	FLAD1	Isoform 1 of FAD synthetase	1	41	21
IPI00012585.1	HEXB	Beta-hexosaminidase subunit beta	1	41	17
IPI00000816.1	YWHAE	14-3-3 protein epsilon	1	41	16
IPI00015856.5	DNPEP	cDNA FLJ56420: highly similar to Aspartyl aminopeptidase	1	41	17
IPI00220834.8	XRCC5	ATP-dependent DNA helicase 2 subunit 2	1	40	26
IPI00003269.1	ACTBL2	Beta-actin-like protein 2	0.9989	40	9
IPI00030363.1	ACAT1	Acetyl-CoA acetyltransferase: mitochondrial	1	40	14
IPI00025426.2	PZP	Isoform 1 of Pregnancy zone protein	1	39	4
IPI00299571.5	PDIA6	Isoform 2 of Protein disulfide-isomerase A6	1	39	20
IPI00027497.5	GPI	Glucose-6-phosphate isomerase	1	39	14
IPI00025252.1	PDIA3	Protein disulfide-isomerase A3	1	38	18
IPI00021263.3	YWHAZ	14-3-3 protein zeta/delta	1	37	12
IPI00010418.5	MYO1C	Isoform 2 of Myosin-Ic	1	37	19
IPI00215948.4	CTNNA1	Isoform 1 of Catenin alpha-1	1	37	28
IPI00293464.5	DDB1;LOC100290337	DNA damage-binding protein 1	1	37	28
IPI00024915.2	PRDX5	Isoform Mitochondrial of Peroxiredoxin-5: mitochondrial	1	36	12
IPI00828189.1	PCMT1	Isoform 2 of Protein-L-isoaspartate(D-aspartate) O-methyltransferase	1	36	12
IPI00008223.3	RAD23B	UV excision repair protein RAD23 homolog B	1	36	8
IPI00100160.3	CAND1	Isoform 1 of Cullin-associated NEDD8-dissociated protein 1	1	35	26
IPI00644127.2	IARS	Isoleucyl-tRNA synthetase: cytoplasmic	1	35	25
IPI00305282.2	RAD50	Isoform 1 of DNA repair protein RAD50	1	34	29
IPI00337335.7	MYH14	Isoform 1 of Myosin-14	1	34	27
IPI00479786.5	KHSRP	KH-type splicing regulatory protein	1	34	13
IPI00396203.6	TBCD	Isoform 1 of Tubulin-specific chaperone D	1	34	24
IPI00026216.4	NPEPPS	Puromycin-sensitive aminopeptidase	1	34	23
IPI00012048.1	NME1	Isoform 1 of Nucleoside diphosphate kinase A	1	33	9
IPI00216049.1	HNRNPK	Isoform 1 of Heterogeneous nuclear ribonucleoprotein K	1	33	8
IPI00000877.1	HYOU1	Hypoxia up-regulated protein 1	1	33	19
IPI00305267.2	GOLGA3	Isoform 1 of Golgin subfamily A member 3	1	32	28
IPI00024403.1	CPNE3	Copine-3	1	32	18
IPI00783097.3	GARS	Glycyl-tRNA synthetase	1	32	17
IPI00169383.3	PGK1	Phosphoglycerate kinase 1	1	32	16
IPI00333533.3	AR	androgen receptor isoform 1	1	32	9
IPI00440493.2	ATP5A1	ATP synthase subunit alpha: mitochondrial	1	31	20
IPI00218342.10	MTHFD1	C-1-tetrahydrofolate synthase: cytoplasmic	1	31	21
IPI00008530.1	RPLP0	60S acidic ribosomal protein P0	1	31	14
IPI00376005.2	EIF5A	Isoform 2 of Eukaryotic translation initiation factor 5A-1	1	31	14
IPI00024919.3	PRDX3	Thioredoxin-dependent peroxide reductase: mitochondrial	1	30	9
IPI00011107.2	IDH2	Isocitrate dehydrogenase [NADP]: mitochondrial	1	30	19
IPI00003881.5	HNRNPF	Heterogeneous nuclear ribonucleoprotein F	1	30	10
IPI00032187.5	NISCH	Isoform 1 of Nischarin	1	30	18
IPI00220301.5	PRDX6	Peroxiredoxin-6	1	30	13
IPI00018146.1	YWHAQ	14-3-3 protein theta	1	30	13
IPI00000690.1	AIFM1	Isoform 1 of Apoptosis-inducing factor 1: mitochondrial	1	29	19
IPI00012066.2	PCBP2	poly(rC) binding protein 2 isoform b	1	29	8
IPI00479217.1	HNRNPU	Isoform Short of Heterogeneous nuclear ribonucleoprotein U	1	29	13
IPI00335168.9	MYL6B;MYL6	Isoform Non-muscle of Myosin light polypeptide 6	1	29	7
IPI00033494.3	MYL12B	Myosin regulatory light chain 12B	1	29	10
IPI00299512.4	NF1	Isoform 2 of Neurofibromin	1	28	22
IPI00301364.3	SKP1	Isoform 1 of S-phase kinase-associated protein 1	1	28	9
IPI00017292.1	CTNNB1	Isoform 1 of Catenin beta-1	1	28	13
IPI00550069.3	RNH1	Ribonuclease inhibitor	1	28	15
IPI00302925.4	CCT8	59 kDa protein	1	28	17
IPI00219446.5	PEBP1	Phosphatidylethanolamine-binding protein 1	1	28	12
IPI00045496.1	USP28	Isoform 1 of Ubiquitin carboxyl-terminal hydrolase 28	1	27	13
IPI00020416.8	TPP2	Tripeptidyl-peptidase 2	1	27	24
IPI00377045.3	LAMA3	Laminin alpha-3 chain variant 1	1	27	16
IPI00024466.2	UGGT1	Isoform 1 of UDP-glucose:glycoprotein glucosyltransferase 1	1	27	24
IPI00218493.7	HPRT1	Hypoxanthine-guanine phosphoribosyltransferase	1	27	13
IPI00072377.1	SET	Isoform 1 of Protein SET	1	27	8
IPI00292657.3	PTGR1	Prostaglandin reductase 1	1	27	14
IPI00031461.2	GDI2	cDNA FLJ60299: highly similar to Rab GDP dissociation inhibitor beta	1	26	18
IPI00013881.6	HNRNPH1	Heterogeneous nuclear ribonucleoprotein H	1	26	7
IPI00026513.6	RPIA	Ribose-5-phosphate isomerase	1	26	12
IPI00183208.3	FBXO22;FBXO22OS	Isoform 1 of F-box only protein 22	1	26	12
IPI00302592.2	FLNA	Isoform 2 of Filamin-A	1	26	20
IPI00290566.1	TCP1	T-complex protein 1 subunit alpha	1	26	20
IPI00027350.3	PRDX2	Peroxiredoxin-2	1	26	7
IPI00337741.4	APEH	Acylamino-acid-releasing enzyme	1	26	15
IPI00000875.7	TUT1;EEF1G	cDNA FLJ56389: highly similar to Elongation factor 1-gamma	1	25	14
IPI00220740.1	NPM1	Isoform 2 of Nucleophosmin	1	25	9
IPI00012102.1	GNS	N-acetylglucosamine-6-sulfatase	1	25	8
IPI00375441.2	FUBP1	Isoform 1 of Far upstream element-binding protein 1	1	25	10
IPI00220642.7	YWHAG	14-3-3 protein gamma	1	25	9
IPI00024933.3	RPL12	Isoform 1 of 60S ribosomal protein L12	1	25	6
IPI00783665.4	LAMA5	Laminin subunit alpha-5	1	25	19
IPI00006662.1	APOD	Apolipoprotein D	1	25	8
IPI00002966.2	HSPA4	Heat shock 70 kDa protein 4	1	24	21
IPI00744692.1	TALDO1	Transaldolase	1	24	12
IPI00337544.7	PDE4DIP	Isoform 2 of Myomegalin	1	24	15
IPI00216318.5	YWHAB	Isoform Long of 14-3-3 protein beta/alpha	1	24	8
IPI00013214.2	MCM3	MCM3 minichromosome maintenance deficient 3 (S. cerevisiae): isoform CRA_b	1	24	12
IPI00644712.4	XRCC6	ATP-dependent DNA helicase 2 subunit 1	1	24	17
IPI00216691.5	PFN1	Profilin-1	1	24	8
IPI00023673.1	LGALS3BP	Galectin-3-binding protein	1	24	8
IPI00218319.3	TPM3	Isoform 2 of Tropomyosin alpha-3 chain	1	24	14
IPI00030275.5	TRAP1	Heat shock protein 75 kDa: mitochondrial	1	24	10
IPI00298961.3	XPO1	Exportin-1	1	24	18
IPI00013508.5	ACTN1	Alpha-actinin-1	1	24	14
IPI00301051.3	NHLRC2	Isoform 1 of NHL repeat-containing protein 2	1	24	14
IPI00301609.8	NEK9	Serine/threonine-protein kinase Nek9	1	23	15
IPI00011229.1	CTSD	Cathepsin D	1	23	12
IPI00003964.4	USP9X	ubiquitin specific protease 9: X-linked isoform 4	1	23	22
IPI00010720.1	CCT5	T-complex protein 1 subunit epsilon	1	23	14
IPI00001734.3	C8orf62	Phosphoserine aminotransferase	1	23	15
IPI00016287.5	THNSL1	Threonine synthase-like 1	1	23	15
IPI00030702.1	IDH3A	Isoform 1 of Isocitrate dehydrogenase [NAD] subunit alpha: mitochondrial	1	23	13
IPI00290142.5	CTPS	CTP synthase 1	1	23	12
IPI00301109.4	PPA2	Isoform 1 of Inorganic pyrophosphatase 2: mitochondrial	0.9848	22	11
IPI00304814.4	GPX4	Isoform Mitochondrial of Phospholipid hydroperoxide glutathione peroxidase: mitochondrial	1	22	12
IPI00298994.6	TLN1	Talin-1	1	22	15
IPI00012007.6	AHCY	Adenosylhomocysteinase	1	22	16
IPI00000581.6	OTUB1	cDNA FLJ56307: highly similar to Ubiquitin thioesterase protein OTUB1	1	22	12
IPI00009032.1	SSB	Lupus La protein	1	22	10
IPI00008524.1	PABPC1	Isoform 1 of Polyadenylate-binding protein 1	1	22	15
IPI00646304.4	PPIB	Peptidyl-prolyl cis-trans isomerase B	1	22	13
IPI00031420.3	UGDH	UDP-glucose 6-dehydrogenase	1	22	11
IPI00299048.6	IQGAP2	Isoform 1 of Ras GTPase-activating-like protein IQGAP2	1	22	22
IPI00022744.5	CSE1L	Isoform 1 of Exportin-2	1	22	10
IPI00216319.3	YWHAH	14-3-3 protein eta	1	22	8
IPI00012268.3	PSMD2	26S proteasome non-ATPase regulatory subunit 2	0.9984	22	20
IPI00020599.1	CALR	Calreticulin	1	22	14
IPI00009104.7	RUVBL2	RuvB-like 2	1	21	16
IPI00401276.6	PDE4DIP	Isoform 7 of Myomegalin	0.9998	21	12
IPI00025849.1	ANP32A;LOC723972	Acidic leucine-rich nuclear phosphoprotein 32 family member A	1	21	10
IPI00619951.3	TPD52	tumor protein D52 isoform 2	1	21	9
IPI00302927.6	CCT4;ILK-2	T-complex protein 1 subunit delta	1	21	14
IPI00011454.1	GANAB	Isoform 2 of Neutral alpha-glucosidase AB	1	21	19
IPI00788907.2	PXMP2;PGAM5	Isoform 1 of Phosphoglycerate mutase family member 5	1	21	9
IPI00027223.2	IDH1	Isocitrate dehydrogenase [NADP] cytoplasmic	1	21	11
IPI00297779.7	CCT2	T-complex protein 1 subunit beta	1	21	12
IPI00182469.4	CTNND1	Isoform 1AB of Catenin delta-1	1	21	7
IPI00003965.5	USP7	Ubiquitin carboxyl-terminal hydrolase 7	1	21	18
IPI00017855.1	ACO2	Aconitate hydratase: mitochondrial	1	20	17
IPI00385631.7	ZZEF1	Isoform 1 of Zinc finger ZZ-type and EF-hand domain-containing protein 1	1	20	16
IPI00220362.5	HSPE1	10 kDa heat shock protein: mitochondrial	1	20	8
IPI00004839.1	CRKL	Crk-like protein	1	20	13
IPI00031517.1	MCM6	DNA replication licensing factor MCM6	1	20	17
IPI00218782.3	CAPZB	cDNA FLJ60094: highly similar to F-actin capping protein subunit beta	1	20	16
IPI00295386.7	CBR1	Carbonyl reductase [NADPH] 1	1	20	8
IPI00004902.1	ETFB	Isoform 1 of Electron transfer flavoprotein subunit beta	1	20	10
IPI00031242.9	SEC16A	Isoform 5 of Protein transport protein Sec16A	1	19	10
IPI00027626.3	CCT6A	T-complex protein 1 subunit zeta	1	19	14
IPI00021917.1	RIPK2	Isoform 1 of Receptor-interacting serine/threonine-protein kinase 2	1	19	11
IPI00293655.3	DDX1	ATP-dependent RNA helicase DDX1	1	19	15
IPI00010810.1	ETFA	Electron transfer flavoprotein subunit alpha: mitochondrial	1	19	10
IPI00940046.1	ASAH1	cDNA FLJ40980 fis: clone UTERU2014464: highly similar to ACID CERAMIDASE	1	19	9
IPI00019848.2	HCFC1	Isoform 1 of Host cell factor	1	19	12
IPI00307524.7	AS3MT	Arsenite methyltransferase	1	19	13
IPI00396435.3	DHX15	Putative pre-mRNA-splicing factor ATP-dependent RNA helicase DHX15	1	19	13
IPI00013933.2	DSP	Isoform DPI of Desmoplakin	1	19	13
IPI00299635.7	BIRC6	baculoviral IAP repeat-containing 6	1	19	15
IPI00018246.5	HK1	Isoform 1 of Hexokinase-1	1	19	17
IPI00011253.3	RPS3	40S ribosomal protein S3	1	19	11
IPI00006482.1	ATP1A1	Isoform Long of Sodium/potassium-transporting ATPase subunit alpha-1	1	19	13
IPI00295851.4	COPB1	Coatomer subunit beta	1	18	18
IPI00140420.4	SND1	Staphylococcal nuclease domain-containing protein 1	1	18	15
IPI00013698.2	ASAH1	Isoform 1 of Acid ceramidase	0.9999	18	9
IPI00295813.3	KIAA1324	Isoform 1 of UPF0577 protein KIAA1324	1	18	15
IPI00018931.6	VPS35	Vacuolar protein sorting-associated protein 35	1	18	17
IPI00386854.6	HNRNPA2B1	Putative uncharacterized protein HNRNPA2B1	1	18	8
IPI00027442.4	AARS	Alanyl-tRNA synthetase: cytoplasmic	1	18	13
IPI00179298.5	HUWE1	482 kDa protein	1	18	15
IPI00019912.3	HSD17B4	Peroxisomal multifunctional enzyme type 2	1	18	11
IPI00797771.1	C20orf117	Isoform 2 of Uncharacterized protein C20orf117	1	18	11
IPI00026665.2	QARS	cDNA FLJ75085: highly similar to Homo sapiens glutaminyl-tRNA synthetase (QARS): mRNA	0.9559	18	16
IPI00027851.2	HEXA	cDNA FLJ53927: highly similar to Beta-hexosaminidase alpha chain	1	18	13
IPI00218236.6	PPP1CB	Serine/threonine-protein phosphatase PP1-beta catalytic subunit	1	18	10
IPI00018465.1	CCT7	T-complex protein 1 subunit eta	1	18	13
IPI00181893.1	PHKB	Isoform 4 of Phosphorylase b kinase regulatory subunit beta	1	18	15
IPI00448630.1	SARM1	Isoform 1 of Sterile alpha and TIR motif-containing protein 1	1	18	16
IPI00218733.6	SOD1	Superoxide dismutase [Cu-Zn]	1	18	10
IPI00029629.3	TRIM25	Tripartite motif-containing protein 25	1	18	10
IPI00021338.2	DLAT	Dihydrolipoyllysine-residue acetyltransferase component of pyruvate dehydrogenase complex: mitochondrial	1	17	11
IPI00033130.3	SAE1	SUMO-activating enzyme subunit 1	1	17	13
IPI00294536.2	STRAP	cDNA FLJ51909: highly similar to Serine-threonine kinase receptor-associatedprotein	1	17	14
IPI00328753.1	KTN1	Isoform 1 of Kinectin	1	17	12
IPI00017454.4	TUBA4B	Putative tubulin-like protein alpha-4B	0.9989	17	2
IPI00010471.5	LCP1	Plastin-2	1	17	13
IPI00031008.1	TNC	Isoform 1 of Tenascin	1	17	15
IPI00009904.1	PDIA4	Protein disulfide-isomerase A4	1	17	13
IPI00028888.1	HNRNPD	Isoform 1 of Heterogeneous nuclear ribonucleoprotein D0	1	17	7
IPI00412880.2	CARM1	Isoform 1 of Histone-arginine methyltransferase CARM1	1	17	14
IPI00220766.5	GLO1	Lactoylglutathione lyase	1	17	10
IPI00018398.4	PSMC3	26S protease regulatory subunit 6A	1	17	14
IPI00215914.5	ARF1	ADP-ribosylation factor 1	1	17	8
IPI00218474.6	ENO3	Isoform 1 of Beta-enolase	1	17	5
IPI00012202.1	WDR77	Methylosome protein 50	1	17	12
IPI00853369.1	PLXNB2	Plexin-B2	1	17	13
IPI00023234.3	UBA2	SUMO-activating enzyme subunit 2	1	17	14
IPI00604664.5	NDUFS1	NADH-ubiquinone oxidoreductase 75 kDa subunit	1	17	10
IPI00221234.7	ALDH7A1	aldehyde dehydrogenase 7 family: member A1	1	17	13
IPI00797186.1	MON2	Isoform 4 of Protein MON2 homolog	1	17	17
IPI00031564.1	GGCT	Isoform 1 of Gamma-glutamylcyclotransferase	1	17	11
IPI00299904.3	MCM7	Isoform 1 of DNA replication licensing factor MCM7	1	17	14
IPI00413344.3	CFL2	Cofilin-2	0.9943	17	6
IPI00021290.5	ACLY	ATP-citrate synthase	1	17	12
IPI00216298.6	TXN	Thioredoxin	1	17	6
IPI00027423.3	PPP1CA	protein phosphatase 1: catalytic subunit: alpha isoform 3	1	16	9
IPI00549189.4	THOP1	Thimet oligopeptidase	1	16	14
IPI00002606.5	SCIN	Isoform 1 of Adseverin	1	16	16
IPI00177728.3	CNDP2	Cytosolic non-specific dipeptidase	1	16	12
IPI00020672.4	DPP3	Isoform 1 of Dipeptidyl-peptidase 3	1	16	13
IPI00002255.5	LRBA	Lipopolysaccharide-responsive and beige-like anchor protein	1	16	11
IPI00172636.5	CAMK2D	Isoform Delta 6 of Calcium/calmodulin-dependent protein kinase type II delta chain	1	16	8
IPI00289499.3	ATIC	Bifunctional purine biosynthesis protein PURH	1	16	16
IPI00027107.5	TUFM	Tu translation elongation factor: mitochondrial precursor	1	16	11
IPI00246975.8	GSTM3	Glutathione S-transferase Mu 3	1	16	11
IPI00006721.4	OPA1	Isoform 1 of Dynamin-like 120 kDa protein: mitochondrial	1	16	13
IPI00219913.10	USP14	Ubiquitin carboxyl-terminal hydrolase 14	1	16	11
IPI00021187.4	RUVBL1	Isoform 1 of RuvB-like 1	1	16	11
IPI00329633.5	TARS	Threonyl-tRNA synthetase: cytoplasmic	1	16	15
IPI00554752.3	PRKAR2B	cAMP-dependent protein kinase type II-beta regulatory subunit	1	16	8
IPI00024284.5	HSPG2	Basement membrane-specific heparan sulfate proteoglycan core protein	1	16	9
IPI00022078.3	NDRG1	Protein NDRG1	1	16	8
IPI00011285.1	CAPN1	Calpain-1 catalytic subunit	1	16	14
IPI00016801.1	GLUD1	Glutamate dehydrogenase 1: mitochondrial	1	16	12
IPI00025491.1	EIF4A1;SNORA67	Eukaryotic initiation factor 4A-I	1	16	12
IPI00332371.9	PFKL	Isoform 1 of 6-phosphofructokinase: liver type	1	16	14
IPI00096066.2	SUCLG2	Succinyl-CoA ligase [GDP-forming] subunit beta: mitochondrial	1	16	13
IPI00215918.3	ARF4	ADP-ribosylation factor 4	1	15	9
IPI00219352.4	CBS	Isoform 1 of Cystathionine beta-synthase	1	15	10
IPI00002535.2	FKBP2	FK506-binding protein 2	1	15	5
IPI00217966.8	LDHA	L-lactate dehydrogenase	1	15	10
IPI00294840.6	AIM1	Absent in melanoma 1 protein	1	15	11
IPI00022443.1	AFP	Alpha-fetoprotein	1	15	3
IPI00479722.2	PSME1	Proteasome activator complex subunit 1	1	15	8
IPI00291646.3	MTHFD1L	Methylenetetrahydrofolate dehydrogenase (NADP+ dependent) 1-like	1	15	14
IPI00843975.1	EZR	Ezrin	1	15	13
IPI00010105.1	EIF6	Eukaryotic translation initiation factor 6	1	15	9
IPI00549730.3	APIP	Isoform 1 of APAF1-interacting protein	1	15	7
IPI00026182.5	CAPZA2	F-actin-capping protein subunit alpha-2	1	15	8
IPI00296099.6	THBS1	Thrombospondin-1	1	15	7
IPI00328328.3	EIF4A2	Isoform 1 of Eukaryotic initiation factor 4A-II	1	15	11
IPI00029744.1	SSBP1	Single-stranded DNA-binding protein: mitochondrial	1	15	7
IPI00376503.2	PYCR1	pyrroline-5-carboxylate reductase 1 isoform 2	1	15	8
IPI00021890.1	HSD17B8	Estradiol 17-beta-dehydrogenase 8	1	15	8
IPI00028514.1	FOLH1	Isoform PSMA-1 of Glutamate carboxypeptidase 2	0.9668	15	11
IPI00008454.1	DNAJB11	DnaJ homolog subfamily B member 11	1	15	8
IPI00007797.3	FABP5L2;FABP5;FABP5L9;FABP5L7	Fatty acid-binding protein: epidermal	1	15	9
IPI00908564.1	-	cDNA FLJ57619: highly similar to Delta 3:5-delta 2:4-dienoyl-CoA isomerase: mitochondrial	0.9999	15	7
IPI00305152.6	SEC31A	Isoform 3 of Protein transport protein Sec31A	1	15	9
IPI00027255.1	MYL6B	Myosin light chain 6B	0.9998	14	5
IPI00171903.2	HNRNPM	Isoform 1 of Heterogeneous nuclear ribonucleoprotein M	1	14	7
IPI00173946.7	TANC1	Isoform 1 of Protein TANC1	1	14	10
IPI00054042.1	GTF2I	Isoform 1 of General transcription factor II-I	1	14	9
IPI00027252.6	PHB2	Prohibitin-2	1	14	11
IPI00007927.4	SMC2	Isoform 1 of Structural maintenance of chromosomes protein 2	1	14	14
IPI00784156.1	AP2B1	Isoform 1 of AP-2 complex subunit beta	1	14	13
IPI00157790.7	KIAA0368	KIAA0368 protein	1	14	10
IPI00555565.1	HSP90AB4P	Putative heat shock protein HSP 90-beta 4	0.9709	14	6
IPI00025366.4	CS	Citrate synthase: mitochondrial	1	14	8
IPI00006451.7	NSF	Vesicle-fusing ATPase	1	14	14
IPI00007102.3	GLOD4	Uncharacterized protein C17orf25	1	14	10
IPI00005724.1	LANCL1	LanC-like protein 1	1	14	9
IPI00005969.3	CAPZA1	F-actin-capping protein subunit alpha-1	1	14	5
IPI00742682.2	TPR	Nucleoprotein TPR	1	14	14
IPI00021828.1	CSTB	Cystatin-B	1	14	6
IPI00030207.1	GMDS	GDP-mannose 4:6 dehydratase	1	14	12
IPI00006608.1	APP	Isoform APP770 of Amyloid beta A4 protein (Fragment)	1	13	7
IPI00028296.1	CAMK1	Calcium/calmodulin-dependent protein kinase type 1	1	13	7
IPI00012535.1	DNAJA1	DnaJ homolog subfamily A member 1	1	13	8
IPI00005087.1	TMOD3	Tropomodulin-3	1	13	11
IPI00026154.3	PRKCSH	cDNA FLJ59211: highly similar to Glucosidase 2 subunit beta	1	13	5
IPI00294578.1	TGM2	Isoform 1 of Protein-glutamine gamma-glutamyltransferase 2	1	13	11
IPI00017367.6	RDX	Radixin: isoform CRA_a	0.9999	13	11
IPI00072534.2	UNC45A	Isoform 1 of Protein unc-45 homolog A	1	13	12
IPI00007423.1	ANP32B	Isoform 1 of Acidic leucine-rich nuclear phosphoprotein 32 family member B	1	13	7
IPI00172460.4	AK2	Isoform 3 of Adenylate kinase 2: mitochondrial	1	13	8
IPI00183572.4	DOCK7	Isoform 2 of Dedicator of cytokinesis protein 7	1	13	11
IPI00008982.1	ALDH18A1	Isoform Long of Delta-1-pyrroline-5-carboxylate synthetase	1	13	11
IPI00021370.1	UBE2K	Isoform 1 of Ubiquitin-conjugating enzyme E2 K	1	13	9
IPI00384297.2	CBR4	Isoform 1 of Carbonyl reductase family member 4	1	13	5
IPI00643041.3	RANP1;RAN	GTP-binding nuclear protein Ran	1	13	6
IPI00015911.1	DLD	Dihydrolipoyl dehydrogenase: mitochondrial	1	13	9
IPI00219585.4	PFKM	Isoform 2 of 6-phosphofructokinase: muscle type	1	13	10
IPI00006252.3	AIMP1	Aminoacyl tRNA synthetase complex-interacting multifunctional protein 1	1	13	12
IPI00293126.1	TBCB	Tubulin-folding cofactor B	1	13	8
IPI00294739.1	SAMHD1	Isoform 1 of SAM domain and HD domain-containing protein 1	1	13	13
IPI00093057.6	CPOX	Coproporphyrinogen-III oxidase: mitochondrial	1	13	8
IPI00449162.1	APIP	Isoform 2 of APAF1-interacting protein	0.9985	13	6
IPI00216951.2	DARS	Aspartyl-tRNA synthetase: cytoplasmic	1	13	13
IPI00296141.4	DPP7	Dipeptidyl-peptidase 2	1	13	8
IPI00414197.3	WDR26	Isoform 1 of WD repeat-containing protein 26	1	12	9
IPI00029997.1	PGLS	6-phosphogluconolactonase	1	12	10
IPI00010154.3	GDI1	Rab GDP dissociation inhibitor alpha	1	12	7
IPI00024990.6	ALDH6A1	Methylmalonate-semialdehyde dehydrogenase [acylating]: mitochondrial	1	12	11
IPI00297593.4	USP34	Isoform 1 of Ubiquitin carboxyl-terminal hydrolase 34	1	12	7
IPI00289535.6	PMPCB	cDNA FLJ78497	1	12	9
IPI00024664.1	USP5	Isoform Long of Ubiquitin carboxyl-terminal hydrolase 5	1	12	10
IPI00182944.2	CAMK2B	Isoform 3 of Calcium/calmodulin-dependent protein kinase type II beta chain	1	12	8
IPI00294879.1	RANGAP1	Ran GTPase-activating protein 1	1	12	12
IPI00007402.3	IPO7	Importin-7	1	12	9
IPI00011603.2	PSMD3	26S proteasome non-ATPase regulatory subunit 3	1	12	10
IPI00154742.6	IGLV1-44;LOC100290481;IGL@;IGLC3;IGLV1-40;IGLV2-14;IGLV2-11;LOC100290557;IGLC1;LOC100293277;IGLV3-21;IGLC2;LOC100293440	IGL@ protein	0.9999	12	1
IPI00177817.4	ATP2A2	Isoform SERCA2A of Sarcoplasmic/endoplasmic reticulum calcium ATPase 2	1	12	11
IPI00441473.3	PRMT5	Protein arginine N-methyltransferase 5	1	12	10
IPI00011609.4	UBE3A	Isoform II of Ubiquitin-protein ligase E3A	1	12	12
IPI00012837.1	KIF5B	Kinesin-1 heavy chain	1	12	12
IPI00016077.1	GBAS	Protein NipSnap homolog 2	1	12	8
IPI00009030.1	LAMP2	Isoform LAMP-2A of Lysosome-associated membrane glycoprotein 2	1	12	3
IPI00420014.2	SNRNP200	Isoform 1 of U5 small nuclear ribonucleoprotein 200 kDa helicase	1	12	9
IPI00465315.6	CYCS	Cytochrome c	1	12	5
IPI00848226.1	GNB2L1	Guanine nucleotide-binding protein subunit beta-2-like 1	1	12	10
IPI00011274.3	HNRPDL	Isoform 1 of Heterogeneous nuclear ribonucleoprotein D-like	0.996	12	3
IPI00291928.8	RAB14	Ras-related protein Rab-14	1	11	9
IPI00029079.5	GMPS	GMP synthase [glutamine-hydrolyzing]	1	11	10
IPI00844578.1	DHX9	ATP-dependent RNA helicase A	1	11	8
IPI00215919.5	ARF5	ADP-ribosylation factor 5	1	11	6
IPI00290770.3	CCT3	chaperonin containing TCP1: subunit 3 isoform b	1	11	11
IPI00872762.2	SUCLG1	Succinyl-CoA ligase [GDP-forming] subunit alpha: mitochondrial	1	11	7
IPI00296053.3	FH	Isoform Mitochondrial of Fumarate hydratase: mitochondrial	1	11	9
IPI00007074.5	YARS	Tyrosyl-tRNA synthetase: cytoplasmic	1	11	11
IPI00430812.6	CNBP	Isoform 1 of Cellular nucleic acid-binding protein	1	11	4
IPI00016342.1	RAB7A	Ras-related protein Rab-7a	1	11	9
IPI00002460.3	ANXA7	Putative uncharacterized protein ANXA7	1	11	8
IPI00020956.1	HDGF	Hepatoma-derived growth factor	1	11	9
IPI00479143.2	PCNT	Pericentrin	1	11	10
IPI00217960.1	PRKACA	Isoform 2 of cAMP-dependent protein kinase catalytic subunit alpha	1	11	8
IPI00646105.3	PYCRL	pyrroline-5-carboxylate reductase-like	1	11	8
IPI00383046.3	CMBL	Carboxymethylenebutenolidase homolog	1	11	9
IPI00217766.3	SCARB2	Lysosome membrane protein 2	1	11	9
IPI00554737.3	PPP2R1A	Serine/threonine-protein phosphatase 2A 65 kDa regulatory subunit A alpha isoform	1	11	10
IPI00018350.3	MCM5	DNA replication licensing factor MCM5	1	11	11
IPI00026105.1	SCP2	Isoform SCPx of Non-specific lipid-transfer protein	1	11	8
IPI00106642.4	SDF2L1	Dihydropyrimidinase-like 2	1	11	9
IPI00009923.1	P4HA1	Isoform 1 of Prolyl 4-hydroxylase subunit alpha-1	1	11	11
IPI00008529.1	RPLP2	60S acidic ribosomal protein P2	1	11	6
IPI00419373.1	HNRNPA3	Isoform 1 of Heterogeneous nuclear ribonucleoprotein A3	1	11	6
IPI00018206.3	GOT2	Aspartate aminotransferase: mitochondrial	1	11	10
IPI00098902.4	OGDH	2-oxoglutarate dehydrogenase E1 component: mitochondrial	1	11	9
IPI00002745.1	CTSZ	Cathepsin Z	1	11	7
IPI00023728.1	GGH	Gamma-glutamyl hydrolase	1	11	5
IPI00024911.1	ERP29	Endoplasmic reticulum protein ERp29	1	11	8
IPI00306290.5	XPOT	Exportin-T	1	11	10
IPI00396370.6	EIF3B	Isoform 1 of Eukaryotic translation initiation factor 3 subunit B	1	11	11
IPI00018873.1	NAMPT	Nicotinamide phosphoribosyltransferase	1	11	7
IPI00293735.2	IKBKAP	Elongator complex protein 1	1	11	10
IPI00009342.1	IQGAP1	Ras GTPase-activating-like protein IQGAP1	1	11	7
IPI00010896.3	CLIC1	Chloride intracellular channel protein 1	1	11	7
IPI00793443.2	IPO5	Isoform 1 of Importin-5	1	11	10
IPI00024913.2	PWP2;C21orf33	Isoform Long of ES1 protein homolog: mitochondrial	1	11	7
IPI00013468.1	BUB3	Mitotic checkpoint protein BUB3	1	11	9
IPI00003326.4	ARL2	ADP-ribosylation factor-like protein 2	1	11	8
IPI00219029.3	GOT1	Aspartate aminotransferase: cytoplasmic	1	11	8
IPI00021700.3	PCNA	Proliferating cell nuclear antigen	1	10	7
IPI00031169.1	RAB2A	Ras-related protein Rab-2A	1	10	8
IPI00003519.1	EFTUD2	116 kDa U5 small nuclear ribonucleoprotein component	1	10	9
IPI00658109.1	CKMT1A;CKMT1B	Isoform 1 of Creatine kinase U-type: mitochondrial	1	10	4
IPI00002520.1	SHMT2	Serine hydroxymethyltransferase: mitochondrial	1	10	10
IPI00017964.1	SNRPD3	Small nuclear ribonucleoprotein Sm D3	1	10	3
IPI00018342.5	AK1	Adenylate kinase isoenzyme 1	1	10	5
IPI00002412.1	PPT1	Palmitoyl-protein thioesterase 1	1	10	7
IPI00412216.2	VPS13C	vacuolar protein sorting 13C protein isoform 2B	1	10	7
IPI00026670.3	TCEB2	Transcription elongation factor B polypeptide 2	1	10	5
IPI00329801.12	ANXA5	Annexin A5	1	10	9
IPI00107104.1	CXorf26	UPF0368 protein Cxorf26	1	10	9
IPI00024993.4	ECHS1	Enoyl-CoA hydratase: mitochondrial	1	10	7
IPI00479523.5	TRIO	Isoform 2 of Triple functional domain protein	1	10	8
IPI00029048.2	TTLL12	Tubulin--tyrosine ligase-like protein 12	1	10	10
IPI00220857.3	CAST	Isoform 2 of Calpastatin	1	10	7
IPI00004247.2	PHKA1	Isoform 1 of Phosphorylase b kinase regulatory subunit alpha: skeletal muscle isoform	1	10	9
IPI00010346.1	NLN	Neurolysin: mitochondrial	1	10	8
IPI00216975.1	TPM4	Isoform 2 of Tropomyosin alpha-4 chain	1	10	7
IPI00004671.2	GOLGB1	Golgin subfamily B member 1	1	10	10
IPI00376119.1	PRKACB	Isoform 2 of cAMP-dependent protein kinase catalytic subunit beta	0.9999	10	7
IPI00103467.4	ALDH1B1	Aldehyde dehydrogenase X: mitochondrial	1	10	6
IPI00003815.3	ARHGDIA	Rho GDP-dissociation inhibitor 1	1	10	5
IPI00334601.5	DHX32	Isoform 2 of Putative pre-mRNA-splicing factor ATP-dependent RNA helicase DHX32	1	10	9
IPI00305692.5	TXNL1	Thioredoxin-like protein 1	1	10	7
IPI00031812.3	YBX1	Nuclease-sensitive element-binding protein 1	0.9999	10	5
IPI00009335.2	C8orf30A	Brain protein 16	1	10	7
IPI00219622.3	PSMA2	Proteasome subunit alpha type-2	1	10	7
IPI00419237.3	LAP3	Isoform 1 of Cytosol aminopeptidase	1	10	5
IPI00170509.5	CAMKK2	Isoform 3 of Calcium/calmodulin-dependent protein kinase kinase 2	1	10	7
IPI00007731.1	BAG5	Isoform 1 of BAG family molecular chaperone regulator 5	1	10	6
IPI00298860.6	LTF	cDNA FLJ78440: highly similar to Human lactoferrin	1	10	2
IPI00375370.1	SEC13	Protein SEC13 homolog	1	10	6
IPI00895852.1	CNBP	zinc finger protein 9 isoform 5	1	10	4
IPI00014230.1	C1QBP	Complement component 1 Q subcomponent-binding protein: mitochondrial	1	10	5
IPI00006207.2	LRRFIP1	Isoform 2 of Leucine-rich repeat flightless-interacting protein 1	1	10	5
IPI00179953.2	NASP	Isoform 1 of Nuclear autoantigenic sperm protein	1	10	5
IPI00017334.1	PHB	Prohibitin	1	10	8
IPI00289819.4	IGF2R	Cation-independent mannose-6-phosphate receptor	1	10	9
IPI00299000.5	PA2G4	Proliferation-associated protein 2G4	1	10	8
IPI00014311.5	CUL2	cDNA FLJ56037: highly similar to Cullin-2	1	10	9
IPI00005780.3	OGT	Isoform 3 of UDP-N-acetylglucosamine--peptide N-acetylglucosaminyltransferase 110 kDa subunit	1	10	9
IPI00032140.4	SERPINH1	Serpin H1	1	10	5
IPI00411559.2	SMC4	Isoform 1 of Structural maintenance of chromosomes protein 4	1	9	9
IPI00783982.1	COPG	Coatomer subunit gamma	1	9	9
IPI00018349.5	MCM4	DNA replication licensing factor MCM4	1	9	5
IPI00166749.3	PMPCA	Mitochondrial-processing peptidase subunit alpha	1	9	7
IPI00465439.5	ALDOA	Fructose-bisphosphate aldolase A	1	9	6
IPI00004795.1	CLNS1A	Methylosome subunit pICln	1	9	5
IPI00647082.1	TBC1D13	TBC1 domain family: member 13	1	9	8
IPI00019540.1	SAPS3	Isoform 4 of Serine/threonine-protein phosphatase 6 regulatory subunit 3	1	9	7
IPI00411706.1	ESD	S-formylglutathione hydrolase	1	9	8
IPI00219468.4	PFN2	Isoform IIa of Profilin-2	1	9	5
IPI00219420.3	SMC3	Structural maintenance of chromosomes protein 3	1	9	7
IPI00023048.4	EEF1D	Isoform 1 of Elongation factor 1-delta	1	9	8
IPI00644674.1	NUBP2	Cytosolic Fe-S cluster assembly factor NUBP2	1	9	7
IPI00062037.1	DYNLL2	Dynein light chain 2: cytoplasmic	1	9	5
IPI00018786.1	C2orf44	Isoform 1 of WD repeat-containing protein C2orf44	1	9	5
IPI00024821.1	PSMD14	26S proteasome non-ATPase regulatory subunit 14	1	9	7
IPI00328257.4	AP1B1	Isoform A of AP-1 complex subunit beta-1	0.9973	9	8
IPI00022314.1	SOD2	Superoxide dismutase [Mn]: mitochondrial	1	9	6
IPI00296635.5	GBE1	1:4-alpha-glucan-branching enzyme	1	9	9
IPI00022793.5	HADHB	Trifunctional enzyme subunit beta: mitochondrial	1	9	9
IPI00021435.3	PSMC2	26S protease regulatory subunit 7	1	9	9
IPI00293276.10	MIF	Macrophage migration inhibitory factor	1	9	2
IPI00019599.1	UBE2V1	Isoform 1 of Ubiquitin-conjugating enzyme E2 variant 1	0.991	9	6
IPI00182938.8	AHCYL1	Isoform 1 of Putative adenosylhomocysteinase 2	1	9	6
IPI00395627.3	CACYBP	Isoform 1 of Calcyclin-binding protein	1	9	8
IPI00017726.1	HSD17B10	Isoform 1 of 3-hydroxyacyl-CoA dehydrogenase type-2	1	9	6
IPI00008964.3	RAB1B	Ras-related protein Rab-1B	1	9	5
IPI00024801.1	RNF41	E3 ubiquitin-protein ligase NRDP1	1	9	6
IPI00007401.2	IPO8	Importin-8	1	9	6
IPI00006754.1	DCAF7	WD repeat-containing protein 68	1	9	7
IPI00024175.3	PSMA7	Isoform 1 of Proteasome subunit alpha type-7	1	9	7
IPI00008380.1	PPP2CA	Serine/threonine-protein phosphatase 2A catalytic subunit alpha isoform	1	9	7
IPI00021983.1	NCSTN	Isoform 1 of Nicastrin	1	9	5
IPI00184330.5	MCM2	DNA replication licensing factor MCM2	1	9	7
IPI00021347.1	UBE2L3	Ubiquitin-conjugating enzyme E2 L3	1	9	3
IPI00293396.5	AP1G1	adaptor-related protein complex 1: gamma 1 subunit isoform a	1	9	9
IPI00299155.5	PSMA4	Proteasome subunit alpha type-4	0.9289	9	5
IPI00645172.1	CARKD	Isoform 2 of Carbohydrate kinase domain-containing protein	1	9	8
IPI00019600.3	UBE2V2	Ubiquitin-conjugating enzyme E2 variant 2	1	9	7
IPI00219156.7	RPL30	60S ribosomal protein L30	1	9	5
IPI00884105.2	LAMP1	Lysosome-associated membrane glycoprotein 1	1	9	4
IPI00034049.1	UPF1	Isoform 1 of Regulator of nonsense transcripts 1	1	9	7
IPI00005040.1	ACADM	Medium-chain specific acyl-CoA dehydrogenase: mitochondrial	1	9	8
IPI00220271.3	AKR1A1	Alcohol dehydrogenase [NADP+]	1	9	8
IPI00220219.6	COPB2	Coatomer subunit beta'	1	9	9
IPI00031801.4	CSDA	Isoform 1 of DNA-binding protein A	0.9999	9	4
IPI00016346.1	PROSC	Proline synthetase co-transcribed bacterial homolog protein	1	9	6
IPI00010844.2	LGALS8	Isoform 1 of Galectin-8	1	9	4
IPI00007928.4	PRPF8	Pre-mRNA-processing-splicing factor 8	1	9	9
IPI00294398.1	HADH	Isoform 1 of Hydroxyacyl-coenzyme A dehydrogenase: mitochondrial	1	9	5
IPI00334587.1	HNRNPAB	Isoform 2 of Heterogeneous nuclear ribonucleoprotein A/B	1	9	4
IPI00217561.2	ITGB1	Isoform Beta-1C of Integrin beta-1	1	8	8
IPI00478231.2	RHOA	Transforming protein RhoA	1	8	7
IPI00418169.3	ANXA2	Isoform 2 of Annexin A2	1	8	7
IPI00216003.4	CUL5	Cullin-5	1	8	7
IPI00024709.1	IKBKB	Inhibitor of nuclear factor kappa-B kinase subunit beta	1	8	7
IPI00939845.1	PANK4	Pantothenate kinase 4	1	8	6
IPI00000230.6	TPM1	tropomyosin 1 alpha chain isoform 2	0.9958	8	5
IPI00007058.1	CORO1B	Coronin-1B	1	8	5
IPI00032826.1	ST13	Hsc70-interacting protein	1	8	6
IPI00020906.1	IMPA1	Inositol monophosphatase	1	8	6
IPI00026305.1	HOOK1	Protein Hook homolog 1	1	8	7
IPI00006025.1	SART3	Isoform 1 of Squamous cell carcinoma antigen recognized by T-cells 3	0.9999	8	4
IPI00419258.4	HMGB1	High mobility group protein B1	1	8	4
IPI00012503.1	PSAP	Isoform Sap-mu-0 of Proactivator polypeptide	1	8	4
IPI00216057.5	SORD	Sorbitol dehydrogenase	1	8	7
IPI00025084.3	CAPNS1	Calpain small subunit 1	1	8	4
IPI00334190.4	STOML2	Stomatin-like protein 2	1	8	5
IPI00017376.2	SEC23B	Protein transport protein Sec23B	1	8	7
IPI00014898.3	PLEC1	Isoform 1 of Plectin-1	1	8	7
IPI00908752.1	CMPK1	cDNA FLJ53966: moderately similar to Homo sapiens cytidylate kinase (CMPK): mRNA	1	8	5
IPI00335385.4	DCPS	Scavenger mRNA-decapping enzyme DcpS	1	8	7
IPI00259102.2	EPDR1	Isoform 1 of Mammalian ependymin-related protein 1	1	8	4
IPI00456642.3	HECTD3	Isoform 1 of Probable E3 ubiquitin-protein ligase HECTD3	1	8	8
IPI00021808.3	HARS	Histidyl-tRNA synthetase: cytoplasmic	1	8	8
IPI00020042.2	PSMC4	Isoform 1 of 26S protease regulatory subunit 6B	1	8	8
IPI00783987.2	C3	Complement C3 (Fragment)	1	8	6
IPI00107555.4	PFN2	Profilin	0.9405	8	5
IPI00292953.6	RAI14	Isoform 2 of Ankycorbin	1	8	7
IPI00003925.6	PDHB	Isoform 1 of Pyruvate dehydrogenase E1 component subunit beta: mitochondrial	1	8	7
IPI00008240.2	MARS	Methionyl-tRNA synthetase: cytoplasmic	1	8	5
IPI00300074.3	FARSB	Phenylalanyl-tRNA synthetase beta chain	1	8	6
IPI00418382.1	OPLAH	5-oxoprolinase	1	8	8
IPI00429538.1	YPEL5	Protein yippee-like 5	1	8	6
IPI00006552.2	CNOT7	CCR4-NOT transcription complex subunit 7	1	8	4
IPI00106502.5	KEAP1	Kelch-like ECH-associated protein 1	1	8	8
IPI00306301.2	PDHA1	Mitochondrial PDHA1	1	8	7
IPI00293088.6	GAA	Lysosomal alpha-glucosidase	1	8	7
IPI00024580.4	MCCC1	Methylcrotonoyl-CoA carboxylase subunit alpha: mitochondrial	1	8	8
IPI00235003.10	FAS	Tumor necrosis factor receptor superfamily: member 6 isoform 1 variant (Fragment)	1	8	4
IPI00216230.3	TMPO	Lamina-associated polypeptide 2: isoform alpha	0.9999	8	6
IPI00030706.1	AHSA1	Activator of 90 kDa heat shock protein ATPase homolog 1	1	8	4
IPI00008164.2	PREP	Prolyl endopeptidase	1	8	7
IPI00178440.3	EEF1B2	Elongation factor 1-beta	1	8	5
IPI00026519.1	PPIF	Peptidyl-prolyl cis-trans isomerase: mitochondrial	1	8	6
IPI00029400.2	ZRANB2	Isoform 1 of Zinc finger Ran-binding domain-containing protein 2	1	8	4
IPI00216308.5	VDAC1	Voltage-dependent anion-selective channel protein 1	1	8	6
IPI00099820.4	RP5-1022P6.2	Putative glycerophosphodiester phosphodiesterase 5	1	8	7
IPI00006212.5	TMPRSS2	Transmembrane protease: serine 2	1	8	3
IPI00013877.2	HNRNPH3	Isoform 1 of Heterogeneous nuclear ribonucleoprotein H3	0.9901	8	3
IPI00305975.4	SPON2	Spondin-2	1	8	4
IPI00015029.1	PTGES3	Prostaglandin E synthase 3	1	8	5
IPI00027078.3	CPD	Carboxypeptidase D	1	8	8
IPI00014310.3	CUL1	Cullin-1	1	8	6
IPI00300567.1	DCI	Isoform 1 of 3:2-trans-enoyl-CoA isomerase: mitochondrial	1	8	5
IPI00100154.1	TOLLIP	Toll-interacting protein	1	8	7
IPI00301579.4	NPC2	cDNA FLJ59142: highly similar to Epididymal secretory protein E1	1	8	2
IPI00023860.1	NAP1L1	Nucleosome assembly protein 1-like 1	1	8	3
IPI00007427.2	AGR2	AGR2	1	8	4
IPI00060650.3	PCNP	Isoform 2 of PEST proteolytic signal-containing nuclear protein	1	8	2
IPI00555734.3	ASRGL1	Isoform 1 of L-asparaginase	1	8	5
IPI00105598.3	PSMD11	Proteasome 26S non-ATPase subunit 11 variant (Fragment)	1	8	8
IPI00003327.1	ARL3	ADP-ribosylation factor-like protein 3	1	8	6
IPI00291939.1	SMC1A	Structural maintenance of chromosomes protein 1A	1	8	8
IPI00218693.8	APRT	Adenine phosphoribosyltransferase	1	8	5
IPI00004860.2	RARS	Isoform Complexed of Arginyl-tRNA synthetase: cytoplasmic	1	8	7
IPI00398007.1	USP40	ubiquitin thioesterase 40	1	8	6
IPI00019269.3	WDR61	WD repeat-containing protein 61	1	7	7
IPI00031583.4	USO1	Putative uncharacterized protein DKFZp451D234	1	7	7
IPI00022240.3	ISCU	Isoform 1 of Iron-sulfur cluster assembly enzyme ISCU: mitochondrial	1	7	4
IPI00429190.4	RAB11A	cDNA FLJ61136: highly similar to Ras-related protein Rab-11A	1	7	5
IPI00246058.10	PDCD6IP	Programmed cell death 6-interacting protein	1	7	6
IPI00024157.1	FKBP3	FK506-binding protein 3	1	7	6
IPI00005634.3	TTC37	Tetratricopeptide repeat protein 37	1	7	7
IPI00291005.8	MDH1	Malate dehydrogenase: cytoplasmic	0.9106	7	5
IPI00221222.7	SUB1	Activated RNA polymerase II transcriptional coactivator p15	1	7	4
IPI00291136.4	COL6A1	Collagen alpha-1(VI) chain	1	7	6
IPI00410666.1	SCRIB	Isoform 3 of Protein LAP4	1	7	6
IPI00032995.1	LANCL2	LanC-like protein 2	1	7	6
IPI00021389.1	CCS	Copper chaperone for superoxide dismutase	1	7	6
IPI00514897.3	KIAA1244	Brefeldin A-inhibited guanine nucleotide-exchange protein 3	1	7	4
IPI00399053.4	NDUFAF3	NADH dehydrogenase [ubiquinone] 1 alpha subcomplex assembly factor 3	1	7	5
IPI00554521.2	FTH1	Ferritin heavy chain	1	7	5
IPI00024776.1	CLGN	Calmegin	1	7	5
IPI00028561.1	KIF5C	Isoform 1 of Kinesin heavy chain isoform 5C	0.9995	7	7
IPI00306960.3	NARS	Asparaginyl-tRNA synthetase: cytoplasmic	1	7	6
IPI00009841.6	EWSR1	Ewing sarcoma breakpoint region 1 isoform 1	0.9561	7	3
IPI00149276.1	BRE;MRPL33	Isoform 1 of BRCA1-A complex subunit BRE	1	7	5
IPI00215911.3	APEX1	DNA-(apurinic or apyrimidinic site) lyase	1	7	3
IPI00014238.2	KARS	Lysyl-tRNA synthetase	1	7	7
IPI00015836.1	APPL1	DCC-interacting protein 13-alpha	1	7	5
IPI00293260.5	DNAJC10	Isoform 1 of DnaJ homolog subfamily C member 10	1	7	7
IPI00026848.3	LRPAP1	Alpha-2-macroglobulin receptor-associated protein	1	7	5
IPI00256861.4	MACF1	Isoform 2 of Microtubule-actin cross-linking factor 1: isoforms 1/2/3/5	1	7	7
IPI00032830.2	REXO2	Isoform 1 of Oligoribonuclease: mitochondrial (Fragment)	1	7	4
IPI00022597.1	UBE2M	NEDD8-conjugating enzyme Ubc12	1	7	5
IPI00014587.1	CLTA	Isoform Brain of Clathrin light chain A	1	7	3
IPI00293867.7	DDT	D-dopachrome decarboxylase	1	7	5
IPI00291483.3	AKR1C3	Aldo-keto reductase family 1 member C3	1	7	7
IPI00005492.2	WDR5	WD repeat-containing protein 5	1	7	6
IPI00102896.1	RAB2B	Ras-related protein Rab-2B	0.9996	7	6
IPI00300341.5	TCEB1	Transcription elongation factor B polypeptide 1	1	7	5
IPI00298347.1	PTPN11	Isoform 2 of Tyrosine-protein phosphatase non-receptor type 11	1	7	7
IPI00027485.3	EIF4E	Eukaryotic translation initiation factor 4E	1	7	5
IPI00010860.1	PSMD9	Isoform p27-L of 26S proteasome non-ATPase regulatory subunit 9	1	7	5
IPI00032406.1	DNAJA2	DnaJ homolog subfamily A member 2	1	7	5
IPI00441344.2	GLB1	Isoform 1 of Beta-galactosidase	1	7	5
IPI00010863.5	ATOX1	Copper transport protein ATOX1	1	7	5
IPI00022227.1	KLK2	Isoform 1 of Kallikrein-2	1	7	4
IPI00003765.1	CAPN7	Calpain-7	1	7	7
IPI00419979.3	LOC646214;PAK2	Serine/threonine-protein kinase PAK 2	1	7	5
IPI00938023.1	LOC392352	similar to TRIMCyp	0.9843	7	4
IPI00451941.6	TSEN34	cDNA FLJ54848: highly similar to tRNA-splicing endonuclease subunit Sen34	1	7	5
IPI00008791.1	CIAO1	Probable cytosolic iron-sulfur protein assembly protein CIAO1	1	7	6
IPI00307155.7	ROCK2	Rho-associated protein kinase 2	1	7	7
IPI00893541.1	PDIA3	14 kDa protein	1	7	4
IPI00140827.3	LOC728825	SMT3 suppressor of mif two 3 homolog 2 isoform b precursor	1	7	3
IPI00299608.3	PSMD1	Isoform 1 of 26S proteasome non-ATPase regulatory subunit 1	1	7	5
IPI00001716.5	PUS1	Isoform 2 of tRNA pseudouridine synthase A	1	7	6
IPI00009328.4	EIF4A3	Eukaryotic initiation factor 4A-III	1	7	7
IPI00023919.4	PSMC5	26S protease regulatory subunit 8	1	7	6
IPI00234368.1	ADK	Isoform Short of Adenosine kinase	1	7	7
IPI00257508.4	DPYSL2	Dihydropyrimidinase-related protein 2	0.9458	7	7
IPI00291175.7	VCL	Isoform 1 of Vinculin	1	7	7
IPI00644697.2	HEBP2	HEBP2 protein (Fragment)	1	7	5
IPI00293564.5	HMGCL	Hydroxymethylglutaryl-CoA lyase: mitochondrial	1	7	7
IPI00006052.3	PFDN2	Prefoldin subunit 2	1	7	4
IPI00013679.1	DUT	Isoform 1 of Deoxyuridine 5'-triphosphate nucleotidohydrolase: mitochondrial	1	7	5
IPI00218568.7	PCBD1	Pterin-4-alpha-carbinolamine dehydratase	1	7	5
IPI00007024.1	FAM96B	UPF0195 protein FAM96B	1	7	4
IPI00220993.1	CNP	Isoform CNPI of 2':3'-cyclic-nucleotide 3'-phosphodiesterase	1	7	6
IPI00549467.3	NIT2	Nitrilase homolog 2	1	7	7
IPI00044761.4	PUS7	Pseudouridylate synthase 7 homolog	1	7	7
IPI00171438.2	MUTED;TXNDC5	Thioredoxin domain-containing protein 5	1	7	7
IPI00216592.2	HNRNPC	Isoform C1 of Heterogeneous nuclear ribonucleoproteins C1/C2	1	7	5
IPI00420108.5	DLSTP;DLST	Dihydrolipoyllysine-residue succinyltransferase component of 2-oxoglutarate dehydrogenase complex: mitochondrial	1	7	5
IPI00028004.2	PSMB3	Proteasome subunit beta type-3	1	7	4
IPI00217540.7	KDM1	Isoform 2 of Lysine-specific histone demethylase 1	1	7	5
IPI00794316.1	PWP2	24 kDa protein	0.9144	7	4
IPI00304082.8	ISOC1	Isochorismatase domain-containing protein 1	1	7	5
IPI00333215.1	TCEA1	Isoform 1 of Transcription elongation factor A protein 1	1	7	4
IPI00220503.9	DCTN2	dynactin 2	1	7	5
IPI00152695.2	WDR82	WD repeat-containing protein 82	1	6	6
IPI00412497.2	DYNLRB1	Dynein: light chain: roadblock-type 1	1	6	5
IPI00306369.3	NSUN2	tRNA (cytosine-5-)-methyltransferase NSUN2	1	6	6
IPI00008527.3	RPLP1	60S acidic ribosomal protein P1	1	6	3
IPI00394788.4	AARS2	Probable alanyl-tRNA synthetase: mitochondrial	1	6	6
IPI00018236.2	GM2A	Ganglioside GM2 activator	1	6	5
IPI00220150.4	IDH3G	Isocitrate dehydrogenase [NAD] subunit gamma: mitochondrial	1	6	6
IPI00000203.1	LRP6	Low-density lipoprotein receptor-related protein 6	1	6	5
IPI00216048.9	PITPNA	Phosphatidylinositol transfer protein alpha isoform	1	6	6
IPI00329143.1	TSEN54	Isoform 1 of tRNA-splicing endonuclease subunit Sen54	1	6	6
IPI00004237.1	PHKA2	Phosphorylase b kinase regulatory subunit alpha: liver isoform	1	6	5
IPI00065671.1	UCK2	Isoform 1 of Uridine-cytidine kinase 2	1	6	5
IPI00021124.3	NKIRAS2	Isoform 1 of NF-kappa-B inhibitor-interacting Ras-like protein 2	1	6	4
IPI00020194.1	TAF15	Isoform Short of TATA-binding protein-associated factor 2N	1	6	2
IPI00063729.4	THOC3	THO complex subunit 3	1	6	6
IPI00170972.2	C9orf64	UPF0553 protein C9orf64	1	6	6
IPI00220113.1	MAP4	Isoform 2 of Microtubule-associated protein 4	1	6	4
IPI00396321.1	LRRC59	Leucine-rich repeat-containing protein 59	1	6	4
IPI00239077.5	HINT1	Histidine triad nucleotide-binding protein 1	1	6	4
IPI00554786.5	TXNRD1	Isoform 5 of Thioredoxin reductase 1: cytoplasmic	1	6	6
IPI00013774.1	HDAC1	Histone deacetylase 1	0.9997	6	5
IPI00011916.1	AIMP2	Aminoacyl tRNA synthetase complex-interacting multifunctional protein 2	1	6	4
IPI00375676.5	FTL	Ferritin	1	6	4
IPI00185533.7	SEH1L	Isoform A of Nucleoporin SEH1	1	6	5
IPI00009010.3	TRMT112	TRM112-like protein	1	6	5
IPI00410067.2	ZC3HAV1	Isoform 1 of Zinc finger CCCH-type antiviral protein 1	1	6	5
IPI00011511.1	CECR5	Isoform 2 of Cat eye syndrome critical region protein 5	1	6	4
IPI00179964.5	PTBP1	Isoform 1 of Polypyrimidine tract-binding protein 1	1	6	3
IPI00291783.3	GEMIN5	Gem-associated protein 5	1	6	6
IPI00009790.1	PFKP	6-phosphofructokinase type C	1	6	5
IPI00220648.5	PMVK	Phosphomevalonate kinase	1	6	5
IPI00219518.7	ARL1	ADP-ribosylation factor-like protein 1	1	6	5
IPI00170935.1	LRRC47	Leucine-rich repeat-containing protein 47	1	6	4
IPI00328361.7	SARS2	Seryl-tRNA synthetase: mitochondrial	1	6	6
IPI00921849.1	-	cDNA FLJ57046: highly similar to Lysosomal alpha-glucosidase	1	6	6
IPI00783378.3	UBE2O	Ubiquitin-conjugating enzyme E2 O	1	6	6
IPI00183938.6	TTC27	Tetratricopeptide repeat protein 27	1	6	6
IPI00016786.1	CDC42	Isoform 2 of Cell division control protein 42 homolog	1	6	3
IPI00020127.1	RPA1	Replication protein A 70 kDa DNA-binding subunit	1	6	6
IPI00019755.3	GSTO1	Glutathione S-transferase omega-1	1	6	6
IPI00017596.3	MAPRE1	Microtubule-associated protein RP/EB family member 1	1	6	5
IPI00221240.3	LNPEP	Isoform 2 of Leucyl-cystinyl aminopeptidase	0.9998	6	4
IPI00016862.1	GSR	Isoform Mitochondrial of Glutathione reductase: mitochondrial	1	6	6
IPI00024381.1	CLP1	Polyribonucleotide 5'-hydroxyl-kinase Clp1	1	6	6
IPI00329635.4	FLCN	Isoform 1 of Folliculin	1	6	5
IPI00005161.3	ARPC2	Actin-related protein 2/3 complex subunit 2	1	6	6
IPI00012970.1	PPP6C	Serine/threonine-protein phosphatase 6 catalytic subunit	1	6	6
IPI00329536.2	EEA1	Early endosome antigen 1	0.9952	6	5
IPI00554538.6	TPP1	60 kDa protein	1	6	5
IPI00022228.2	HDLBP	Vigilin	1	6	6
IPI00303832.6	RTF1	Paf1/RNA polymerase II complex component	0.9658	6	4
IPI00007935.5	PDLIM5	PDZ and LIM domain protein 5	1	6	3
IPI00026625.1	NUP155	Isoform 1 of Nuclear pore complex protein Nup155	1	6	6
IPI00745419.2	UROS	Uroporphyrinogen III synthase	1	6	5
IPI00414320.2	ANXA11	cDNA FLJ55482: highly similar to Annexin A11	1	6	6
IPI00297473.2	TRAF3	TNF receptor-associated factor 3	0.9799	6	2
IPI00217852.6	PM20D2	Peptidase M20 domain-containing protein 2	1	6	5
IPI00026328.3	TXNDC12	Thioredoxin domain-containing protein 12	1	6	5
IPI00220342.5	DDAH1	N(G):N(G)-dimethylarginine dimethylaminohydrolase 1	1	6	4
IPI00019329.1	DYNLL1	Dynein light chain 1: cytoplasmic	1	6	4
IPI00304417.7	IDH3B	Isocitrate dehydrogenase 3: beta subunit isoform a precursor	1	6	6
IPI00021926.4	PSMC6	26S protease regulatory subunit S10B	1	6	3
IPI00026689.4	CDC2	Putative uncharacterized protein DKFZp686L20222	1	6	6
IPI00294653.2	DOPEY2	Isoform 1 of Protein dopey-2	1	6	5
IPI00005102.3	SMS	Isoform 1 of Spermine synthase	1	6	4
IPI00180386.5	GYG1	Isoform GN-1L of Glycogenin-1	1	6	4
IPI00018452.3	CPNE1	Copine-1	1	6	5
IPI00025874.2	RPN1	Dolichyl-diphosphooligosaccharide--protein glycosyltransferase subunit 1 precursor	1	6	5
IPI00297579.4	CBX3	Chromobox protein homolog 3	1	6	6
IPI00219065.2	AGL	Isoform 5 of Glycogen debranching enzyme	1	6	5
IPI00032179.3	SERPINC1	Antithrombin-III	0.9998	6	3
IPI00219861.3	ACP1	Isoform 1 of Low molecular weight phosphotyrosine protein phosphatase	1	6	6
IPI00291922.2	PSMA5	Proteasome subunit alpha type-5	1	6	5
IPI00168479.3	APOA1BP	cDNA FLJ56357: highly similar to Homo sapiens apolipoprotein A-I binding protein (APOA1BP): mRNA	1	6	4
IPI00852685.1	DIAPH1	Isoform 1 of Protein diaphanous homolog 1	1	6	6
IPI00215920.8	ARF6	ADP-ribosylation factor 6	1	6	5
IPI00296215.2	EPCAM	Epithelial cell adhesion molecule	1	6	3
IPI00293975.5	-	16 kDa protein	1	6	6
IPI00301034.2	NADK	Putative uncharacterized protein NADK	1	6	5
IPI00075248.11	CALM3;CALM2;CALM1;C2orf61	Calmodulin	1	6	4
IPI00023510.1	RAB5A	Ras-related protein Rab-5A	1	6	5
IPI00179057.6	CUL4B	Isoform 1 of Cullin-4B	1	6	6
IPI00029623.1	PSMA6	Proteasome subunit alpha type-6	1	6	6
IPI00453476.2	-	29 kDa protein	1	6	2
IPI00009960.6	IMMT	Isoform 1 of Mitochondrial inner membrane protein	1	6	6
IPI00465429.3	RUFY1	Isoform 2 of RUN and FYVE domain-containing protein 1	1	6	5
IPI00376798.3	RPL11	Isoform 1 of 60S ribosomal protein L11	1	6	3
IPI00550308.1	CPNE1;RBM12	RNA-binding protein 12	1	6	4
IPI00102425.1	RPRD1A	Isoform 1 of Regulation of nuclear pre-mRNA domain-containing protein 1A	1	6	6
IPI00219097.4	HMGB2	High mobility group protein B2	0.9467	6	4
IPI00418741.6	FUK	Isoform 1 of L-fucose kinase	1	6	6
IPI00304435.3	NIPSNAP1	Protein NipSnap homolog 1	1	6	4
IPI00000643.1	BAG2	BAG family molecular chaperone regulator 2	1	6	5
IPI00001466.2	EML4	Echinoderm microtubule-associated protein-like 4	1	5	5
IPI00215790.6	RPL38	60S ribosomal protein L38	1	5	5
IPI00784614.1	2015-09-09	septin 9 isoform a	1	5	4
IPI00334159.6	VBP1	Von Hippel-Lindau binding protein 1	1	5	4
IPI00019966.5	C5orf22	Isoform 1 of UPF0489 protein C5orf22	1	5	4
IPI00215743.3	RRBP1	Isoform 3 of Ribosome-binding protein 1	1	5	5
IPI00015351.2	C1orf128	Isoform 1 of UPF0424 protein C1orf128	1	5	4
IPI00419194.2	IAH1	Isoamyl acetate-hydrolyzing esterase 1 homolog	1	5	5
IPI00478758.2	C10orf119	Isoform 1 of UPF0557 protein C10orf119	1	5	4
IPI00293845.5	RIF1	Isoform 1 of Telomere-associated protein RIF1	1	5	4
IPI00431405.2	C5orf33	Isoform 2 of UPF0465 protein C5orf33	1	5	4
IPI00027493.1	LOC442497;SLC3A2	Isoform 2 of 4F2 cell-surface antigen heavy chain	1	5	5
IPI00183508.3	TWF1	twinfilin 1	1	5	4
IPI00295857.7	COPA	Isoform 1 of Coatomer subunit alpha	0.9999	5	5
IPI00220487.4	ATP5H	Isoform 1 of ATP synthase subunit d: mitochondrial	1	5	4
IPI00438923.3	CRYZL1	Quinone oxidoreductase-like protein 1	1	5	4
IPI00023530.7	CDK5	Cell division protein kinase 5	1	5	5
IPI00217952.6	GFPT1	Isoform 1 of Glucosamine--fructose-6-phosphate aminotransferase [isomerizing] 1	1	5	4
IPI00216348.1	DYNC1I2	Isoform 2C of Cytoplasmic dynein 1 intermediate chain 2	1	5	3
IPI00010460.2	AIP	AH receptor-interacting protein	1	5	3
IPI00328319.8	RBBP4	Histone-binding protein RBBP4	1	5	5
IPI00216932.4	ACSS1	Isoform 1 of Acetyl-coenzyme A synthetase 2-like: mitochondrial	1	5	5
IPI00304589.4	TNKS1BP1	Isoform 1 of 182 kDa tankyrase-1-binding protein	1	5	2
IPI00221178.1	TPD52L2	Isoform 2 of Tumor protein D54	1	5	4
IPI00329338.3	PCYT1A	Choline-phosphate cytidylyltransferase A	1	5	4
IPI00640981.3	UBR4	Isoform 4 of E3 ubiquitin-protein ligase UBR4	0.9994	5	5
IPI00478410.2	ATP5C1	Isoform Liver of ATP synthase subunit gamma: mitochondrial	1	5	3
IPI00103994.4	LARS	Leucyl-tRNA synthetase: cytoplasmic	1	5	5
IPI00152998.3	LRRC40	Leucine-rich repeat-containing protein 40	1	5	5
IPI00027831.1	GRWD1	Glutamate-rich WD repeat-containing protein 1	1	5	3
IPI00000335.1	HINT2	Histidine triad nucleotide-binding protein 2	1	5	2
IPI00872350.2	GALC	Isoform 1 of Galactocerebrosidase	1	5	5
IPI00654777.2	EIF3F	HCG1784554: isoform CRA_a	1	5	5
IPI00017375.2	SEC23A	Protein transport protein Sec23A	1	5	4
IPI00644472.2	HDHD2	Isoform 2 of Haloacid dehalogenase-like hydrolase domain-containing protein 2	1	5	2
IPI00005159.3	ACTR2	Actin-related protein 2	1	5	5
IPI00289601.10	HDAC2	Isoform 2 of Histone deacetylase 2	1	5	4
IPI00025341.2	BDH1	D-beta-hydroxybutyrate dehydrogenase: mitochondrial	1	5	5
IPI00025019.3	PSMB1	Proteasome subunit beta type-1	1	5	5
IPI00013917.3	RPS12	40S ribosomal protein S12	1	5	3
IPI00328154.4	UBA3	NEDD8-activating enzyme E1 catalytic subunit	1	5	3
IPI00449906.4	ARHGEF7	cDNA FLJ56152: highly similar to Rho guanine nucleotide exchange factor 7	1	5	5
IPI00414717.1	GLG1	Isoform 2 of Golgi apparatus protein 1	1	5	4
IPI00514832.2	TRIM56	Isoform 1 of Tripartite motif-containing protein 56	0.9736	5	4
IPI00004437.1	ANKRD10	Isoform 2 of Ankyrin repeat domain-containing protein 10	1	5	2
IPI00477505.3	ANKRD28	Isoform 1 of Serine/threonine-protein phosphatase 6 regulatory ankyrin repeat subunit A	1	5	4
IPI00003704.4	RBM4	Isoform 1 of RNA-binding protein 4	1	5	3
IPI00383449.2	RAB15	Isoform 2 of Ras-related protein Rab-15	0.9001	5	1
IPI00006167.1	PPM1G	Protein phosphatase 1G	1	5	3
IPI00000513.1	CDH1	Cadherin 1: type 1: E-cadherin (Epithelial): isoform CRA_c	1	5	2
IPI00167546.3	C2orf69	UPF0565 protein C2orf69	1	5	4
IPI00294158.1	BLVRA	Biliverdin reductase A	1	5	5
IPI00101987.6	C19orf62	Isoform 1 of BRCA1-A complex subunit MERIT40	1	5	4
IPI00218914.5	ALDH1A1	Retinal dehydrogenase 1	1	5	3
IPI00008485.1	ACO1	Cytoplasmic aconitate hydratase	1	5	4
IPI00300562.2	RAB3B	Ras-related protein Rab-3B	1	5	4
IPI00013847.4	UQCRC1	Cytochrome b-c1 complex subunit 1: mitochondrial	1	5	5
IPI00395887.4	TMX1	Thioredoxin-related transmembrane protein 1	1	5	5
IPI00004358.4	PYGB	Glycogen phosphorylase: brain form	1	5	5
IPI00384051.6	PSME2	Putative uncharacterized protein PSME2	1	5	4
IPI00429191.3	ETF1	Eukaryotic peptide chain release factor subunit 1	1	5	4
IPI00073772.5	FBP1	Fructose-1:6-bisphosphatase 1	1	5	4
IPI00219525.10	PGD	6-phosphogluconate dehydrogenase: decarboxylating	1	5	5
IPI00030243.1	PSME3	Isoform 1 of Proteasome activator complex subunit 3	1	5	3
IPI00550523.5	ATL3	Isoform 1 of Atlastin-3	1	5	4
IPI00018953.1	DPP4	Dipeptidyl peptidase 4	1	5	5
IPI00017344.3	RAB5B	Ras-related protein Rab-5B	1	5	4
IPI00007346.1	PPIH	Peptidyl-prolyl cis-trans isomerase H	0.9737	5	3
IPI00217232.2	SUCLA2	Isoform 2 of Succinyl-CoA ligase [ADP-forming] subunit beta: mitochondrial	1	5	5
IPI00300371.5	SF3B3	Isoform 1 of Splicing factor 3B subunit 3	1	5	5
IPI00376344.3	MYO1B	Isoform 1 of Myosin-Ib	1	5	5
IPI00019178.2	PSPH	Phosphoserine phosphatase	1	5	5
IPI00029159.5	MRE11A	cDNA FLJ38069 fis: clone CTONG2015434: highly similar to DOUBLE-STRAND BREAK REPAIR PROTEIN MRE11A	1	5	5
IPI00004534.4	PFAS	Phosphoribosylformylglycinamidine synthase	1	5	4
IPI00219526.6	PGM1	Isoform 1 of Phosphoglucomutase-1	1	5	4
IPI00014263.1	EIF4H	Isoform Long of Eukaryotic translation initiation factor 4H	1	5	3
IPI00024364.2	TNPO1	Isoform 1 of Transportin-1	1	5	4
IPI00007675.6	DYNC1LI1	Cytoplasmic dynein 1 light intermediate chain 1	1	5	4
IPI00029056.2	SEPHS1	Selenide: water dikinase 1	1	5	5
IPI00293613.2	TBK1	Serine/threonine-protein kinase TBK1	1	5	5
IPI00005656.1	RGL2	Ral guanine nucleotide dissociation stimulator-like 2	1	5	4
IPI00329719.1	MYO1D	Isoform 1 of Myosin-Id	1	5	5
IPI00008730.2	SCGN	Secretagogin	1	5	5
IPI00029019.7	UBAP2L	Isoform 2 of Ubiquitin-associated protein 2-like	1	5	3
IPI00103087.2	GEMIN6	Gem-associated protein 6	1	5	5
IPI00009958.6	COPS5	COP9 signalosome complex subunit 5	1	5	4
IPI00871617.1	BRCC3	Isoform 1 of Lys-63-specific deubiquitinase BRCC36	1	5	5
IPI00013004.1	PDXK	Isoform 1 of Pyridoxal kinase	1	5	4
IPI00009253.2	NAPA	Alpha-soluble NSF attachment protein	1	5	5
IPI00646689.1	TXNDC17	Thioredoxin domain-containing protein 17	1	5	4
IPI00419721.1	EPM2AIP1	EPM2A-interacting protein 1	1	5	5
IPI00014312.1	CUL3	Isoform 1 of Cullin-3	1	5	5
IPI00029557.3	GRPEL1	GrpE protein homolog 1: mitochondrial	1	5	3
IPI00297045.5	MKLN1	Isoform 1 of Muskelin	1	5	5
IPI00305490.5	HAUS8	Isoform 1 of HAUS augmin-like complex subunit 8	1	5	4
IPI00010201.4	PSMD8	proteasome 26S non-ATPase subunit 8	0.9999	5	2
IPI00477962.3	UAP1L1	Isoform 1 of UDP-N-acetylhexosamine pyrophosphorylase-like protein 1	1	5	2
IPI00044388.3	INPP4A	Isoform 3 of Type I inositol-3:4-bisphosphate 4-phosphatase	1	5	5
IPI00375380.4	PSMD13	proteasome 26S non-ATPase subunit 13 isoform 2	1	5	5
IPI00002459.4	ANXA6	annexin VI isoform 2	1	5	5
IPI00642211.3	RNPEP	Aminopeptidase B	1	5	3
IPI00873472.1	SEC24A	Isoform 1 of Protein transport protein Sec24A	1	5	3
IPI00219084.2	RELA	Isoform 2 of Transcription factor p65	1	5	5
IPI00014577.1	RAB18	Ras-related protein Rab-18	1	5	5
IPI00293434.2	SRP14	Signal recognition particle 14 kDa protein	1	5	2
IPI00479997.4	STMN1	Stathmin	1	5	4
IPI00295209.5	SNX5	Sorting nexin-5	1	5	5
IPI00645702.1	CTPS2	CTP synthase 2	1	5	4
IPI00301421.5	ZC3HC1	Isoform 1 of Nuclear-interacting partner of ALK	1	5	4
IPI00010706.1	GSS	Glutathione synthetase	1	5	4
IPI00157144.2	GYS1	glycogen synthase 1 (muscle) isoform 2	1	5	5
IPI00013404.1	SMAD4	Mothers against decapentaplegic homolog 4	1	5	4
IPI00012303.3	SELENBP1	cDNA FLJ55757: highly similar to Selenium-binding protein 1	0.9999	5	5
IPI00306436.1	STAT3	Isoform Del-701 of Signal transducer and activator of transcription 3	1	5	4
IPI00642494.2	UPRT	Isoform 1 of Uracil phosphoribosyltransferase	1	5	4
IPI00414819.2	SKIV2L	Helicase SKI2W	1	5	5
IPI00294911.1	SDHB	Succinate dehydrogenase [ubiquinone] iron-sulfur subunit: mitochondrial	1	5	5
IPI00010157.1	MAT2A	S-adenosylmethionine synthetase isoform type-2	1	5	5
IPI00328243.2	PLD3	Phospholipase D3	1	5	4
IPI00027834.3	HNRNPL	Heterogeneous nuclear ribonucleoprotein L	1	5	4
IPI00026268.3	GNB1	Guanine nucleotide-binding protein G(I)/G(S)/G(T) subunit beta-1	1	5	2
IPI00182933.5	CYB5A	Isoform 2 of Cytochrome b5	1	4	3
IPI00329629.6	DNAJC7	DnaJ homolog subfamily C member 7	1	4	4
IPI00746165.2	WDR1	Isoform 1 of WD repeat-containing protein 1	1	4	4
IPI00333763.7	GLRX5	Glutaredoxin-related protein 5	1	4	3
IPI00386755.2	ERO1L	ERO1-like protein alpha	1	4	4
IPI00384689.3	PDXDC1	Isoform 1 of Pyridoxal-dependent decarboxylase domain-containing protein 1	1	4	4
IPI00009659.3	RPRD1B	Regulation of nuclear pre-mRNA domain-containing protein 1B	1	4	3
IPI00304692.1	RBMX	Heterogeneous nuclear ribonucleoprotein G	0.9999	4	3
IPI00010748.2	RBCK1	Isoform 3 of RanBP-type and C3HC4-type zinc finger-containing protein 1	1	4	3
IPI00384708.2	PDSS2	Isoform 1 of Decaprenyl-diphosphate synthase subunit 2	1	4	4
IPI00215720.1	FMR1	Isoform 1 of Fragile X mental retardation 1 protein	0.9994	4	4
IPI00018968.2	NAE1	NEDD8-activating enzyme E1 regulatory subunit	1	4	4
IPI00218993.1	HSPH1	Isoform Beta of Heat shock protein 105 kDa	1	4	4
IPI00014825.8	KCTD9	BTB/POZ domain-containing protein KCTD9	1	4	4
IPI00018783.1	ITPA	Inosine triphosphate pyrophosphatase	1	4	4
IPI00004798.4	CRISP3	cDNA FLJ75207	1	4	2
IPI00024145.2	VDAC2	Isoform 2 of Voltage-dependent anion-selective channel protein 2	1	4	3
IPI00300096.4	RAB35	Ras-related protein Rab-35	0.9971	4	1
IPI00013297.1	PDAP1	28 kDa heat- and acid-stable phosphoprotein	1	4	3
IPI00219613.4	PITRM1	Isoform 1 of Presequence protease: mitochondrial	0.9998	4	3
IPI00550689.3	C22orf28	UPF0027 protein C22orf28	1	4	4
IPI00382790.3	SHARPIN	Isoform 2 of Sharpin	1	4	4
IPI00604711.3	KIF1A	Isoform 1 of Kinesin-like protein KIF1A	0.9998	4	2
IPI00215780.5	RPS19	40S ribosomal protein S19	1	4	4
IPI00027505.2	ITGAV	Isoform 1 of Integrin alpha-V	1	4	4
IPI00008475.1	HMGCS1	Hydroxymethylglutaryl-CoA synthase: cytoplasmic	1	4	4
IPI00032342.4	TRIP12	TRIP12 protein	0.9985	4	2
IPI00305469.4	CRK	v-crk sarcoma virus CT10 oncogene homolog isoform b	1	4	4
IPI00164061.2	CNOT6L	Isoform 1 of CCR4-NOT transcription complex subunit 6-like	1	4	4
IPI00418262.5	ALDOC	Fructose-bisphosphate aldolase	0.9998	4	4
IPI00297251.3	MGRN1	Isoform 2 of Probable E3 ubiquitin-protein ligase MGRN1	1	4	3
IPI00030116.2	PGM3	cDNA FLJ55543: highly similar to Phosphoacetylglucosamine mutase	1	4	4
IPI00009540.1	MALT1	Isoform 1 of Mucosa-associated lymphoid tissue lymphoma translocation protein 1	1	4	4
IPI00218775.2	FKBP5	FK506-binding protein 5	0.9998	4	4
IPI00025285.3	ATP6V1G1	V-type proton ATPase subunit G 1	1	4	3
IPI00001593.1	PRCP	Lysosomal Pro-X carboxypeptidase	1	4	4
IPI00011643.1	SPINT1	Isoform 2 of Kunitz-type protease inhibitor 1	1	4	3
IPI00291328.3	NDUFV2	NADH dehydrogenase [ubiquinone] flavoprotein 2: mitochondrial	1	4	2
IPI00746777.3	ADH5P4;ADH5	Alcohol dehydrogenase class-3	1	4	4
IPI00028083.1	EIF2B2	Translation initiation factor eIF-2B subunit beta	1	4	3
IPI00023137.1	TOR1B	Torsin-1B	1	4	4
IPI00154645.8	TBC1D15	TBC1 domain family: member 15 isoform 1	1	4	3
IPI00001710.3	C11orf2	Isoform 1 of Protein fat-free homolog	1	4	4
IPI00021016.3	TSFM	Isoform 1 of Elongation factor Ts: mitochondrial	1	4	4
IPI00412224.2	BRWD2	Bromodomain and WD repeat-containing protein 2	0.9852	4	3
IPI00374563.3	AGRN	Agrin	0.9734	4	2
IPI00641181.5	MARCKSL1	MARCKS-related protein	1	4	2
IPI00473047.2	PRKAG1	cDNA FLJ40287 fis: clone TESTI2027909: highly similar to 5'-AMP-ACTIVATED PROTEIN KINASE: GAMMA-1 SUBUNIT	1	4	4
IPI00413293.6	TOR1A	Torsin family 1: member A (Torsin A): isoform CRA_a	1	4	4
IPI00251783.2	ANKRD17	Isoform 3 of Ankyrin repeat domain-containing protein 17	1	4	4
IPI00019380.1	NCBP1	Nuclear cap-binding protein subunit 1	1	4	4
IPI00013939.3	RPA2	Isoform 1 of Replication protein A 32 kDa subunit	1	4	3
IPI00013862.7	DTYMK	Thymidylate kinase	1	4	4
IPI00218728.4	PAFAH1B1	Isoform 1 of Platelet-activating factor acetylhydrolase IB subunit alpha	0.9999	4	4
IPI00024673.2	MAPK9	Isoform Alpha-2 of Mitogen-activated protein kinase 9	1	4	4
IPI00008274.7	CAP1	Isoform 1 of Adenylyl cyclase-associated protein 1	0.9999	4	4
IPI00743663.3	TRAF6	TNF receptor-associated factor 6	1	4	4
IPI00010090.1	GCLM	Glutamate--cysteine ligase regulatory subunit	1	4	3
IPI00464978.1	IRS2	Insulin receptor substrate 2 insertion mutant (Fragment)	0.9999	4	2
IPI00303105.3	SUMO1	Small ubiquitin-related modifier 1	0.9998	4	2
IPI00257882.7	PEPD	Xaa-Pro dipeptidase	1	4	4
IPI00219678.3	EIF2S1	Eukaryotic translation initiation factor 2 subunit 1	1	4	4
IPI00009931.3	HDHD3	Haloacid dehalogenase-like hydrolase domain-containing protein 3	1	4	4
IPI00024661.5	SEC24C	Protein transport protein Sec24C	1	4	3
IPI00003949.1	UBE2N	Ubiquitin-conjugating enzyme E2 N	1	4	3
IPI00215768.3	GCLC	Glutamate--cysteine ligase catalytic subunit	1	4	4
IPI00640703.3	XPO5	Isoform 1 of Exportin-5	1	4	4
IPI00418497.1	TIMM50	Isoform 2 of Mitochondrial import inner membrane translocase subunit TIM50	1	4	3
IPI00031023.1	FLII	Protein flightless-1 homolog	1	4	4
IPI00010697.2	ITGA6	Isoform Alpha-6X1X2B of Integrin alpha-6	1	4	4
IPI00016910.1	EIF3CL;EIF3C	Eukaryotic translation initiation factor 3 subunit C	0.9886	4	4
IPI00019450.2	TROVE2	Isoform Long of 60 kDa SS-A/Ro ribonucleoprotein	1	4	4
IPI00056357.3	C19orf10	UPF0556 protein C19orf10	1	4	3
IPI00414629.2	UNC119B	Protein unc-119 homolog B	1	4	4
IPI00021831.1	PRKAR1A	cAMP-dependent protein kinase type I-alpha regulatory subunit	1	4	4
IPI00220739.3	PGRMC1	Membrane-associated progesterone receptor component 1	1	4	4
IPI00783271.1	LRPPRC	Leucine-rich PPR motif-containing protein: mitochondrial	1	4	4
IPI00443909.1	CNPY2	Isoform 1 of Protein canopy homolog 2	1	4	4
IPI00002894.2	POLD1	DNA polymerase delta catalytic subunit	0.9977	4	4
IPI00297084.7	DDOST	Dolichyl-diphosphooligosaccharide--protein glycosyltransferase 48 kDa subunit	1	4	4
IPI00328715.4	MTDH	Protein LYRIC	1	4	2
IPI00014177.3	2015-09-02	Septin-2	0.9163	4	4
IPI00305383.1	UQCRC2	Cytochrome b-c1 complex subunit 2: mitochondrial	1	4	4
IPI00549357.3	FOXRED1	Isoform 1 of FAD-dependent oxidoreductase domain-containing protein 1	0.9958	4	3
IPI00023542.6	TMED9	Transmembrane emp24 domain-containing protein 9	0.9948	4	3
IPI00034319.2	CUTA	Isoform A of Protein CutA	1	4	2
IPI00017895.3	GPD2	Isoform 1 of Glycerol-3-phosphate dehydrogenase: mitochondrial	1	4	4
IPI00386533.3	EIF4G1	eukaryotic translation initiation factor 4 gamma: 1 isoform 4	1	4	3
IPI00071703.2	GFM2	Elongation factor G 2: mitochondrial precursor	0.9995	4	4
IPI00003482.1	DECR1	2:4-dienoyl-CoA reductase: mitochondrial	1	4	4
IPI00011913.1	HNRNPA0	Heterogeneous nuclear ribonucleoprotein A0	1	4	3
IPI00719622.1	RPS28	40S ribosomal protein S28	1	4	3
IPI00103484.3	EDARADD	Isoform A of Ectodysplasin-A receptor-associated adapter protein	1	4	1
IPI00783034.4	C17orf70	Isoform 1 of Fanconi anemia-associated protein of 100 kDa	1	4	4
IPI00005038.1	HRSP12	Ribonuclease UK114	1	4	4
IPI00016605.3	C1orf123	UPF0587 protein C1orf123	0.9979	4	4
IPI00216106.3	OLA1	Isoform 3 of Obg-like ATPase 1	1	4	1
IPI00154473.5	GFM1	Elongation factor G 1: mitochondrial	1	4	4
IPI00019997.1	LIN7C	Lin-7 homolog C	0.9799	4	3
IPI00185374.4	PSMD12	26S proteasome non-ATPase regulatory subunit 12	1	4	3
IPI00015947.5	DNAJB1	DnaJ homolog subfamily B member 1	1	4	4
IPI00220710.5	ACOT9	Isoform 1 of Acyl-coenzyme A thioesterase 9: mitochondrial	1	4	4
IPI00291093.3	POLR2E	DNA-directed RNA polymerases I: II: and III subunit RPABC1	1	4	3
IPI00298520.4	ARCN1	Coatomer subunit delta variant 2	1	4	4
IPI00219381.5	NDUFA2	NADH dehydrogenase [ubiquinone] 1 alpha subcomplex subunit 2	1	4	4
IPI00026516.1	OXCT1	Succinyl-CoA:3-ketoacid-coenzyme A transferase 1: mitochondrial	1	4	3
IPI00168112.2	PDDC1	Isoform 1 of Parkinson disease 7 domain-containing protein 1	1	4	4
IPI00012575.1	PIR	Pirin	1	4	4
IPI00031804.1	VDAC3	Isoform 1 of Voltage-dependent anion-selective channel protein 3	0.9769	4	2
IPI00742124.2	UBXN7	UBX domain-containing protein 7	1	4	3
IPI00218465.10	PLAA	Phospholipase A-2-activating protein	1	4	3
IPI00009505.1	SNTB2	Isoform 1 of Beta-2-syntrophin	1	4	3
IPI00289462.1	MOCS1	Isoform MOCS1B of Molybdenum cofactor biosynthesis protein 1	1	4	3
IPI00003217.3	PSMB7	Proteasome subunit beta type-7	1	4	2
IPI00219301.7	MARCKS	Myristoylated alanine-rich C-kinase substrate	0.9786	4	2
IPI00000873.3	VARS	Valyl-tRNA synthetase	1	4	4
IPI00644409.2	GDA	Guanine deaminase	1	4	3
IPI00026546.1	PAFAH1B2	Platelet-activating factor acetylhydrolase IB subunit beta	1	4	3
IPI00015897.2	CHORDC1	Isoform 1 of Cysteine and histidine-rich domain-containing protein 1	1	4	3
IPI00026942.5	ERLIN2	Isoform 1 of Erlin-2	1	4	4
IPI00217439.6	CDAN1	Isoform 1 of Codanin-1	1	4	4
IPI00290928.2	GNA13	Guanine nucleotide-binding protein subunit alpha-13	1	4	4
IPI00154451.9	MMS19	cDNA FLJ55586: highly similar to MMS19-like protein	1	4	3
IPI00029723.1	FSTL1	Follistatin-related protein 1	0.9999	4	3
IPI00217296.2	PPP2R4	Isoform 3 of Serine/threonine-protein phosphatase 2A regulatory subunit B'	1	4	2
IPI00102997.1	WRNIP1	Isoform 2 of ATPase WRNIP1	1	4	3
IPI00005648.1	SAFB2	Scaffold attachment factor B2	0.9985	4	3
IPI00003766.4	ETHE1	Protein ETHE1: mitochondrial	1	4	3
IPI00220014.2	IDI1	Isoform 2 of Isopentenyl-diphosphate Delta-isomerase 1	1	4	3
IPI00003921.2	EPB41	Isoform 1 of Protein 4.1	0.9985	4	2
IPI00006991.1	CDKN1B	Cyclin-dependent kinase inhibitor 1B	1	4	2
IPI00003817.3	ARHGDIB	Rho GDP-dissociation inhibitor 2	1	4	3
IPI00032409.1	ROBLD3	Isoform 1 of Mitogen-activated protein-binding protein-interacting protein	1	4	3
IPI00465022.9	SMCHD1	Isoform 2 of Structural maintenance of chromosomes flexible hinge domain-containing protein 1	0.9983	4	4
IPI00221300.2	EIF2B1	Translation initiation factor eIF-2B subunit alpha	1	4	4
IPI00019376.7	2015-09-11	cDNA FLJ53374: highly similar to Septin-11	1	4	3
IPI00045921.1	ATAD3B	TOB3	1	4	4
IPI00008418.6	DIABLO	Diablo homolog: mitochondrial precursor	1	4	2
IPI00156374.6	IPO4	Isoform 1 of Importin-4	1	4	4
IPI00013415.1	RPS7	40S ribosomal protein S7	1	4	3
IPI00383751.1	-	CALRETICULIN=CALCIUM binding protein (Fragment)	1	4	3
IPI00027443.5	CARS	cysteinyl-tRNA synthetase isoform c	1	4	4
IPI00014194.3	C2orf29	Uncharacterized protein C2orf29	0.9999	4	4
IPI00060031.3	ARL8A	ADP-ribosylation factor-like protein 8A	0.998	4	4
IPI00514002.4	STARD9	Isoform 1 of StAR-related lipid transfer protein 9	0.976	4	3
IPI00553006.1	PARS2	Probable prolyl-tRNA synthetase: mitochondrial	1	4	3
IPI00470891.2	CSDE1	Isoform Long of Cold shock domain-containing protein E1	0.9999	4	4
IPI00015148.3	RAP1B	Ras-related protein Rap-1b	1	4	4
IPI00306516.1	TIMM44	Mitochondrial import inner membrane translocase subunit TIM44	1	4	3
IPI00029046.1	MLEC	Malectin	0.9993	4	3
IPI00412771.1	CD2AP	CD2-associated protein	0.9999	4	3
IPI00010440.5	HAX1	cDNA FLJ53021: highly similar to HS1-associating protein X-1	0.9902	3	2
IPI00304163.4	C12orf10	C12orf10 protein	1	3	3
IPI00032957.1	UBE2I	SUMO-conjugating enzyme UBC9	0.9999	3	3
IPI00292020.3	SRM	Spermidine synthase	1	3	3
IPI00745568.2	TIPRL	Isoform 1 of TIP41-like protein	1	3	3
IPI00298935.4	KDM3B	Isoform 1 of Lysine-specific demethylase 3B	1	3	3
IPI00009943.2	TPT1	Tumor protein: translationally-controlled 1	0.9991	3	3
IPI00179589.4	-	14 kDa protein	1	3	2
IPI00182757.10	KIAA1967	Isoform 1 of Protein KIAA1967	1	3	3
IPI00220171.5	MAPT	Isoform Fetal-tau of Microtubule-associated protein tau	0.9603	3	3
IPI00411291.1	PEX1	Peroxisome biogenesis factor 1	0.9738	3	3
IPI00011126.6	PSMC1	26S protease regulatory subunit 4	0.9985	3	2
IPI00014151.3	PSMD6	26S proteasome non-ATPase regulatory subunit 6	0.9985	3	2
IPI00304409.3	CARHSP1	Calcium-regulated heat stable protein 1	1	3	2
IPI00023101.1	RQCD1	Cell differentiation protein RCD1 homolog	1	3	3
IPI00218803.3	FBLN1	Isoform B of Fibulin-1	0.9758	3	2
IPI00902969.2	GFER	FAD-linked sulfhydryl oxidase ALR	1	3	2
IPI00015954.1	SAR1A	GTP-binding protein SAR1a	1	3	3
IPI00013895.1	S100A11	Protein S100-A11	1	3	3
IPI00020332.1	ARG2	Arginase-2: mitochondrial	1	3	3
IPI00166638.3	C8orf82	Isoform 1 of UPF0598 protein C8orf82	1	3	3
IPI00220637.5	SARS	Seryl-tRNA synthetase: cytoplasmic	1	3	3
IPI00026944.3	NID1	Isoform 1 of Nidogen-1	1	3	3
IPI00174390.3	PDE12	Isoform 1 of 2':5'-phosphodiesterase 12	0.9995	3	2
IPI00550746.4	NUDC	Nuclear migration protein nudC	1	3	3
IPI00169285.6	PLBD2	Putative phospholipase B-like 2	1	3	3
IPI00419433.2	RAB11FIP1	Isoform 1 of Rab11 family-interacting protein 1	0.9999	3	2
IPI00893336.1	hCG_1745121	notch1-induced protein isoform b	1	3	3
IPI00177938.2	TLE3	Isoform 2 of Transducin-like enhancer protein 3	1	3	3
IPI00216410.1	CASP2	Isoform ICH-1S of Caspase-2	1	3	3
IPI00375638.7	SAPS2	Isoform 2 of Serine/threonine-protein phosphatase 6 regulatory subunit 2	0.9988	3	2
IPI00170796.1	VPS29	Isoform 1 of Vacuolar protein sorting-associated protein 29	1	3	3
IPI00009268.2	ACY1	cDNA FLJ60317: highly similar to Aminoacylase-1	1	3	3
IPI00384280.5	PCYOX1	Prenylcysteine oxidase 1	1	3	3
IPI00165506.4	POLDIP2	Polymerase delta-interacting protein 2	1	3	3
IPI00007722.2	AMPD2	Adenosine monophosphate deaminase 2	0.9922	3	3
IPI00099996.2	RG9MTD1	Mitochondrial ribonuclease P protein 1	0.9998	3	3
IPI00027717.1	GEMIN4	Component of gems 4	1	3	3
IPI00217143.3	SDHA	57 kDa protein	1	3	1
IPI00185146.5	IPO9	Importin-9	1	3	3
IPI00165230.1	DAZAP1	Isoform 1 of DAZ-associated protein 1	1	3	2
IPI00163230.5	COPS6	COP9 signalosome complex subunit 6	1	3	2
IPI00028635.5	RPN2	Dolichyl-diphosphooligosaccharide--protein glycosyltransferase subunit 2	0.9998	3	2
IPI00028412.1	SSSCA1	Sjoegren syndrome/scleroderma autoantigen 1	0.9814	3	2
IPI00033600.1	PPP1R7	Isoform 1 of Protein phosphatase 1 regulatory subunit 7	1	3	3
IPI00382958.1	MTAP	MTAP protein	0.9999	3	2
IPI00002186.5	ARFGEF2	Brefeldin A-inhibited guanine nucleotide-exchange protein 2	0.9945	3	2
IPI00028055.4	TMED10	Transmembrane emp24 domain-containing protein 10	1	3	2
IPI00005198.2	ILF2	Interleukin enhancer-binding factor 2	1	3	2
IPI00027175.1	SRI	Sorcin	1	3	2
IPI00009662.2	NT5DC2	Isoform 1 of 5'-nucleotidase domain-containing protein 2	0.9999	3	3
IPI00218918.5	ANXA1	Annexin A1	0.9996	3	3
IPI00305289.2	KIF11	Kinesin-like protein KIF11	1	3	3
IPI00414909.1	NAGA	Alpha-N-acetylgalactosaminidase	1	3	3
IPI00016669.1	RHEB	GTP-binding protein Rheb	1	3	3
IPI00024281.1	SIP1	Isoform 1 of Survival of motor neuron protein-interacting protein 1	1	3	2
IPI00005179.1	POLR1C	Isoform 1 of DNA-directed RNA polymerases I and III subunit RPAC1	1	3	3
IPI00336016.3	CARS2	Probable cysteinyl-tRNA synthetase: mitochondrial	1	3	3
IPI00152658.1	NEK7	Serine/threonine-protein kinase Nek7	1	3	2
IPI00292168.3	ASF1A	Histone chaperone ASF1A	1	3	2
IPI00291419.6	ACAT2	cDNA FLJ53975: highly similar to Acetyl-CoA acetyltransferase: cytosolic	1	3	2
IPI00306398.7	NUDCD1	Isoform 2 of NudC domain-containing protein 1	0.9999	3	3
IPI00008219.1	RAD23A	UV excision repair protein RAD23 homolog A	1	3	2
IPI00017412.1	RFC2	Isoform 1 of Replication factor C subunit 2	0.9998	3	3
IPI00061507.2	C11orf54	Isoform 3 of Ester hydrolase C11orf54	1	3	3
IPI00005631.2	GCC2	Isoform 1 of GRIP and coiled-coil domain-containing protein 2	0.9878	3	3
IPI00018871.2	ARL8B	cDNA FLJ56285: highly similar to ADP-ribosylation factor-like protein 8B	0.9997	3	3
IPI00017672.4	NP	cDNA FLJ25678 fis: clone TST04067: highly similar to PURINE NUCLEOSIDE PHOSPHORYLASE	1	3	3
IPI00004506.3	KCTD5	BTB/POZ domain-containing protein KCTD5	1	3	3
IPI00219604.3	MAP2K1	Dual specificity mitogen-activated protein kinase kinase 1	1	3	3
IPI00012833.1	PPP4C	Serine/threonine-protein phosphatase 4 catalytic subunit	0.9985	3	2
IPI00007694.5	PPME1	Isoform 1 of Protein phosphatase methylesterase 1	1	3	3
IPI00294728.1	DMXL1	DmX-like protein 1	1	3	3
IPI00470924.2	TMTC3	Isoform 2 of Transmembrane and TPR repeat-containing protein 3	0.9931	3	2
IPI00019463.3	EIF2AK2	Interferon-induced: double-stranded RNA-activated protein kinase	1	3	3
IPI00290420.2	HPGD	hydroxyprostaglandin dehydrogenase 15-(NAD) isoform 2	1	3	3
IPI00166123.4	TTC5	Tetratricopeptide repeat protein 5	0.9999	3	3
IPI00002548.3	STON1	Stonin-1	0.9101	3	3
IPI00031708.1	FAH	Fumarylacetoacetase	1	3	3
IPI00013897.1	ADAM10	Disintegrin and metalloproteinase domain-containing protein 10	1	3	3
IPI00305551.3	GNA11	Guanine nucleotide-binding protein subunit alpha-11	1	3	3
IPI00394834.3	VWA2	Isoform 1 of von Willebrand factor A domain-containing protein 2	0.9491	3	3
IPI00026492.3	GCAT	2-amino-3-ketobutyrate coenzyme A ligase: mitochondrial	1	3	3
IPI00012831.2	HBXIP	hepatitis B virus x-interacting protein	1	3	2
IPI00419263.3	PECI	Isoform 2 of Peroxisomal 3:2-trans-enoyl-CoA isomerase	1	3	3
IPI00100213.2	RRM2B	Isoform 1 of Ribonucleoside-diphosphate reductase subunit M2 B	1	3	3
IPI00939159.2	CAP1	Adenylyl cyclase-associated protein	0.9999	3	3
IPI00160021.2	NFU1	HIRA interacting protein 5 isoform 1	1	3	3
IPI00022276.3	MRPS28	28S ribosomal protein S28: mitochondrial	1	3	3
IPI00023591.1	PURA	Transcriptional activator protein Pur-alpha	0.9999	3	3
IPI00022348.2	PML	Isoform PML-1 of Probable transcription factor PML	0.9992	3	2
IPI00029534.1	PPAT	Amidophosphoribosyltransferase	1	3	3
IPI00549666.1	GRPEL2	GrpE protein homolog 2: mitochondrial	1	3	3
IPI00017469.1	SPR	Sepiapterin reductase	1	3	3
IPI00182728.2	VPS4B	Vacuolar protein sorting-associated protein 4B	0.9972	3	3
IPI00022694.3	PSMD4	Isoform Rpn10A of 26S proteasome non-ATPase regulatory subunit 4	1	3	3
IPI00024317.1	GCDH	Isoform Long of Glutaryl-CoA dehydrogenase: mitochondrial	0.9875	3	3
IPI00465361.4	RPL13	60S ribosomal protein L13	0.9999	3	3
IPI00016725.2	GTF3C4	General transcription factor 3C polypeptide 4	1	3	3
IPI00006164.4	ILKAP	Integrin-linked kinase-associated serine/threonine phosphatase 2C	1	3	3
IPI00024674.2	MAP2K4	Mitogen-activated protein kinase kinase 4: isoform CRA_c	1	3	3
IPI00339384.5	RDH11	Isoform 1 of Retinol dehydrogenase 11	1	3	3
IPI00007682.2	ATP6V1A	V-type proton ATPase catalytic subunit A	1	3	3
IPI00009922.3	C14orf156	SRA stem-loop-interacting RNA-binding protein: mitochondrial	1	3	3
IPI00074258.3	MASTL	Isoform 1 of Microtubule-associated serine/threonine-protein kinase-like	0.9999	3	3
IPI00791573.1	SUGT1	Isoform 2 of Suppressor of G2 allele of SKP1 homolog	1	3	2
IPI00005745.1	SPTLC1	Serine palmitoyltransferase 1	1	3	3
IPI00022156.3	ZNF765	Isoform 1 of Zinc finger protein 765	0.9905	3	3
IPI00013871.1	RRM1	Ribonucleoside-diphosphate reductase large subunit	1	3	3
IPI00254162.2	PTBP2	cDNA FLJ55936: highly similar to Polypyrimidine tract-binding protein 2	0.9828	3	2
IPI00555956.2	PSMB4	Proteasome subunit beta type-4	1	3	3
IPI00024896.2	PBLD	Phenazine biosynthesis-like domain-containing protein	0.9976	3	3
IPI00026964.2	UQCRFS1	Cytochrome b-c1 complex subunit Rieske: mitochondrial	0.9483	3	3
IPI00021327.3	GRB2	Isoform 1 of Growth factor receptor-bound protein 2	0.9999	3	2
IPI00293167.4	SDF2	Stromal cell-derived factor 2	0.9968	3	1
IPI00022431.2	AHSG	cDNA FLJ55606: highly similar to Alpha-2-HS-glycoprotein	0.9958	3	1
IPI00029054.1	NT5C2	Cytosolic purine 5'-nucleotidase	0.9852	3	3
IPI00412987.10	GMFB	Glia maturation factor: beta	1	3	3
IPI00026833.4	ADSS	Adenylosuccinate synthetase isozyme 2	1	3	2
IPI00013272.1	GOLGA4	Isoform 1 of Golgin subfamily A member 4	0.9997	3	3
IPI00015609.1	DCAF16	Uncharacterized protein C4orf30	1	3	3
IPI00026359.4	CAB39L	Calcium-binding protein 39-like	0.9988	3	2
IPI00376195.5	ISCA2	Iron-sulfur cluster assembly 2 homolog: mitochondrial	1	3	3
IPI00410714.5	HBA2;HBA1	Hemoglobin subunit alpha	1	3	3
IPI00180128.4	BZW1	Isoform 2 of Basic leucine zipper and W2 domain-containing protein 1	1	3	3
IPI00013257.1	SSBP4	Single-stranded DNA-binding protein 4	0.9747	3	1
IPI00022608.1	SORL1	Sortilin-related receptor	0.9999	3	3
IPI00024920.1	ATP5D	ATP synthase subunit delta: mitochondrial	0.9998	3	2
IPI00411426.3	VPS26A	Vacuolar protein sorting-associated protein 26A	1	3	3
IPI00009950.1	LMAN2	Vesicular integral-membrane protein VIP36	1	3	3
IPI00010407.5	RAP1GAP	Putative uncharacterized protein RAP1GAP	0.9996	3	3
IPI00288958.7	KIAA1632	Isoform 2 of UPF0493 protein KIAA1632	1	3	3
IPI00021794.8	CTSA	Lysosomal protective protein	1	3	3
IPI00304655.2	KIAA1712	Uncharacterized protein KIAA1712	0.9954	3	3
IPI00012795.3	EIF3I	Eukaryotic translation initiation factor 3 subunit I	1	3	2
IPI00017763.6	NAP1L4	cDNA FLJ59403: highly similar to Nucleosome assembly protein 1-like 4	0.9998	3	3
IPI00028946.2	RTN3	Isoform 3 of Reticulon-3	1	3	2
IPI00017704.3	COTL1	Coactosin-like protein	0.9992	3	2
IPI00007052.6	FIS1	Mitochondrial fission 1 protein	1	3	2
IPI00003479.3	MAPK1	Mitogen-activated protein kinase 1	1	3	3
IPI00017283.2	IARS2	Isoleucyl-tRNA synthetase: mitochondrial	0.9999	3	3
IPI00013212.1	CSK	Tyrosine-protein kinase CSK	1	3	3
IPI00003031.3	ISOC2	Isoform 2 of Isochorismatase domain-containing protein 2: mitochondrial	1	3	3
IPI00002569.3	EIF4EBP1	Eukaryotic translation initiation factor 4E-binding protein 1	1	3	2
IPI00789008.1	FLOT2	Flotillin-2	1	3	2
IPI00217920.6	ALDH16A1	Isoform 1 of Aldehyde dehydrogenase family 16 member A1	1	3	3
IPI00783434.1	MAN2C1	Alpha-mannosidase 2C1	0.9812	3	3
IPI00303962.3	PPCDC	Isoform 1 of Phosphopantothenoylcysteine decarboxylase	1	3	2
IPI00012369.1	MAD2L1	Mitotic spindle assembly checkpoint protein MAD2A	1	3	3
IPI00409601.1	RALGAPB	Isoform 1 of Protein KIAA1219	1	3	3
IPI00305461.3	ITIH2	Inter-alpha-trypsin inhibitor heavy chain H2	0.9998	3	3
IPI00025796.3	NDUFS3	NADH dehydrogenase [ubiquinone] iron-sulfur protein 3: mitochondrial	1	3	3
IPI00031836.3	DRG1	Developmentally-regulated GTP-binding protein 1	1	3	3
IPI00003565.1	PSMD10	26S proteasome non-ATPase regulatory subunit 10	1	3	3
IPI00395903.1	TMEM106B	Transmembrane protein 106B	1	3	2
IPI00215637.5	DDX3X	ATP-dependent RNA helicase DDX3X	1	3	3
IPI00465142.2	KIAA0528	Isoform 1 of Uncharacterized protein KIAA0528	1	3	3
IPI00032959.3	GPD1L	Glycerol-3-phosphate dehydrogenase 1-like protein	0.9999	3	3
IPI00031820.3	FARSA	Phenylalanyl-tRNA synthetase alpha chain	1	3	2
IPI00007673.4	CHCHD2	Coiled-coil-helix-coiled-coil-helix domain-containing protein 2: mitochondrial	1	3	3
IPI00002922.5	TBL1XR1	F-box-like/WD repeat-containing protein TBL1XR1	1	3	2
IPI00084571.4	MRPL39	Isoform 2 of 39S ribosomal protein L39: mitochondrial	1	3	3
IPI00295741.4	CTSB	Cathepsin B	1	3	3
IPI00021346.1	UBE2E1	Ubiquitin-conjugating enzyme E2 E1	1	3	2
IPI00219330.2	ILF3	Isoform 5 of Interleukin enhancer-binding factor 3	1	3	3
IPI00012989.2	MAN2B1	Lysosomal alpha-mannosidase	0.9999	3	3
IPI00019383.2	GALK1	cDNA FLJ56840: highly similar to Galactokinase	1	3	3
IPI00007611.1	ATP5O	ATP synthase subunit O: mitochondrial	1	3	2
IPI00015077.1	EIF1	Eukaryotic translation initiation factor 1	1	3	3
IPI00021277.2	NUBP1	Isoform 1 of Cytosolic Fe-S cluster assembly factor NUBP1	1	3	3
IPI00607685.1	NUDT4P1;NUDT4	Isoform 1 of Diphosphoinositol polyphosphate phosphohydrolase 2	1	3	3
IPI00031131.4	C20orf3	Isoform 1 of Adipocyte plasma membrane-associated protein	1	3	3
IPI00301936.4	ELAVL1	cDNA FLJ60076: highly similar to ELAV-like protein 1	1	3	3
IPI00216874.2	LYSMD2	Isoform 1 of LysM and putative peptidoglycan-binding domain-containing protein 2	1	3	3
IPI00337415.9	GNAI1	Guanine nucleotide-binding protein G(i): alpha-1 subunit	0.9999	3	2
IPI00297982.7	EIF2S3	Eukaryotic translation initiation factor 2 subunit 3	1	3	3
IPI00059762.5	LYPLAL1	Isoform 1 of Lysophospholipase-like protein 1	1	3	3
IPI00414554.5	ARPC5L	Actin-related protein 2/3 complex subunit 5-like protein	1	3	3
IPI00296863.3	DCTD	Isoform 1 of Deoxycytidylate deaminase	1	3	2
IPI00171844.3	COPS4	COP9 signalosome complex subunit 4	0.9508	3	2
IPI00647650.3	EIF3H	Eukaryotic translation initiation factor 3: subunit 3 gamma: 40kDa: isoform CRA_b	1	3	3
IPI00220578.3	GNAI3	Guanine nucleotide-binding protein G(k) subunit alpha	0.9998	3	3
IPI00002134.4	PSMD5	26S proteasome non-ATPase regulatory subunit 5	1	3	3
IPI00148063.1	HEBP1	Heme-binding protein 1	1	3	3
IPI00010740.1	SFPQ	Isoform Long of Splicing factor: proline- and glutamine-rich	1	3	3
IPI00328082.3	TARSL2	Isoform 1 of Probable threonyl-tRNA synthetase 2: cytoplasmic	0.952	3	3
IPI00644529.1	ZNF615;ZNF432	Isoform 1 of Zinc finger protein 615	0.9773	3	2
IPI00296913.1	NUDT5	ADP-sugar pyrophosphatase	1	3	3
IPI00005904.3	DDX20	Probable ATP-dependent RNA helicase DDX20	0.9998	3	3
IPI00216008.4	G6PD	Isoform Long of Glucose-6-phosphate 1-dehydrogenase	1	3	3
IPI00152981.1	ACAD9	Acyl-CoA dehydrogenase family member 9: mitochondrial	1	3	3
IPI00748490.1	AARSD1	alanyl-tRNA synthetase domain containing 1 isoform 1	1	3	3
IPI00007811.1	CDK4	Cell division protein kinase 4	1	3	3
IPI00006113.1	POLR2I	DNA-directed RNA polymerase II subunit RPB9	0.9301	3	2
IPI00003588.1	EEF1E1	Eukaryotic translation elongation factor 1 epsilon-1	1	3	3
IPI00479877.4	ALDH9A1	aldehyde dehydrogenase 9A1	1	3	3
IPI00001999.2	OIP5	Protein Mis18-beta	1	3	3
IPI00480056.8	RAB4A	RAB4A: member RAS oncogene family variant	1	3	3
IPI00020928.1	TFAM	Transcription factor A: mitochondrial	1	3	3
IPI00001589.1	TIMM13	Mitochondrial import inner membrane translocase subunit Tim13	1	3	2
IPI00216767.1	PDE8B	Isoform 3 of High affinity cAMP-specific and IBMX-insensitive 3':5'-cyclic phosphodiesterase 8B	1	3	3
IPI00003927.5	PPID	40 kDa peptidyl-prolyl cis-trans isomerase	0.9422	3	2
IPI00006443.3	CRYL1	Isoform 1 of Lambda-crystallin homolog	0.9988	3	3
IPI00002552.2	AP1M2	Isoform 1 of AP-1 complex subunit mu-2	1	2	2
IPI00551062.2	CNPY3	Isoform 1 of Protein canopy homolog 3	1	2	2
IPI00329321.3	LYRM7	LYR motif-containing protein 7	0.9994	2	2
IPI00216508.3	SNX3	Isoform 2 of Sorting nexin-3	0.9972	2	1
IPI00010348.1	DNASE2	Deoxyribonuclease-2-alpha	0.9998	2	2
IPI00002324.6	MAT2B	Isoform 1 of Methionine adenosyltransferase 2 subunit beta	0.9975	2	2
IPI00017448.1	RPS21;LOC100291837	40S ribosomal protein S21	0.9997	2	2
IPI00410214.1	BPNT1	Isoform 1 of 3'(2'):5'-bisphosphate nucleotidase 1	0.9014	2	2
IPI00072541.4	PCID2	Isoform 3 of PCI domain-containing protein 2	0.9992	2	2
IPI00004406.1	UPP1	Isoform 1 of Uridine phosphorylase 1	1	2	2
IPI00032825.2	TMED7;TMED7-TICAM2;TICAM2	Transmembrane emp24 domain-containing protein 7	1	2	2
IPI00106687.4	LXN	Latexin	1	2	2
IPI00003842.3	MAP2	Isoform 1 of Microtubule-associated protein 2	0.9709	2	1
IPI00017297.1	MATR3	Matrin-3	0.9985	2	2
IPI00008579.3	FARS2	Phenylalanyl-tRNA synthetase: mitochondrial	1	2	2
IPI00022542.1	ROCK1	Rho-associated protein kinase 1	0.9645	2	2
IPI00154567.5	SPATA20	Isoform 2 of Spermatogenesis-associated protein 20	0.9145	2	2
IPI00419531.2	CPSF2	Cleavage and polyadenylation specificity factor subunit 2	0.9972	2	2
IPI00335280.3	RPE;hCG_2024410	Isoform 1 of Ribulose-phosphate 3-epimerase	0.9999	2	2
IPI00452731.6	NDUFA7	NADH dehydrogenase [ubiquinone] 1 alpha subcomplex subunit 7	1	2	1
IPI00025647.1	FBXO21	Isoform 2 of F-box only protein 21	1	2	2
IPI00028387.3	DDRGK1	Isoform 1 of DDRGK domain-containing protein 1	0.9999	2	2
IPI00411705.2	C13orf1	Isoform 1 of Chronic lymphocytic leukemia deletion region gene 6 protein	1	2	2
IPI00020454.1	DCK	Deoxycytidine kinase	1	2	2
IPI00413324.6	RPL17	60S ribosomal protein L17	0.9991	2	2
IPI00658145.3	C7orf27	Isoform 1 of HEAT repeat-containing protein C7orf27	0.9932	2	2
IPI00303292.1	KPNA1	Importin subunit alpha-1	0.9668	2	2
IPI00025846.3	DSC2	Isoform 2A of Desmocollin-2	0.9998	2	2
IPI00006602.3	NDEL1	nudE nuclear distribution gene E homolog (A. nidulans)-like 1 isoform A	0.9985	2	1
IPI00071180.1	UBQLN1	Isoform 2 of Ubiquilin-1	0.9839	2	1
IPI00010339.3	PTS	6-pyruvoyl tetrahydrobiopterin synthase	1	2	2
IPI00147874.1	NANS	Sialic acid synthase	1	2	2
IPI00218829.9	GSPT1	Eukaryotic peptide chain release factor GTP-binding subunit ERF3A	0.9999	2	2
IPI00010948.2	TRIM26	Tripartite motif-containing protein 26	0.9997	2	2
IPI00029012.1	EIF3A	Eukaryotic translation initiation factor 3 subunit A	0.9945	2	1
IPI00031618.3	DDI2	Isoform 3 of Protein DDI1 homolog 2	1	2	2
IPI00298202.1	ACOT8	Acyl-coenzyme A thioesterase 8	0.999	2	2
IPI00015842.1	RCN1	Reticulocalbin-1	0.9985	2	2
IPI00018288.1	POLR2C	DNA-directed RNA polymerase II subunit RPB3	1	2	2
IPI00306473.1	NFIX	Isoform 3 of Nuclear factor 1 X-type	0.9985	2	2
IPI00003505.3	TRIP13	Isoform 1 of Thyroid receptor-interacting protein 13	1	2	2
IPI00037448.3	GRHPR	Glyoxylate reductase/hydroxypyruvate reductase	1	2	2
IPI00100106.1	RIC8A	resistance to inhibitors of cholinesterase 8 homolog A	0.9683	2	2
IPI00020530.1	ACOT13	Acyl-coenzyme A thioesterase 13	0.9878	2	2
IPI00001636.1	ATXN10	Ataxin-10	0.9709	2	2
IPI00827773.1	-	Cold agglutinin FS-1 L-chain (Fragment)	0.9411	2	2
IPI00061525.3	GNPNAT1	Glucosamine 6-phosphate N-acetyltransferase	1	2	2
IPI00003606.3	RNF14	E3 ubiquitin-protein ligase RNF14	1	2	2
IPI00031514.1	RFC5	Replication factor C subunit 5	1	2	2
IPI00003635.4	ERGIC1	cDNA FLJ56280: highly similar to Endoplasmic reticulum-Golgi intermediate compartment protein 1	1	2	2
IPI00012382.3	SNRPA	U1 small nuclear ribonucleoprotein A	0.9545	2	2
IPI00299254.3	EIF5B	Eukaryotic translation initiation factor 5B	0.9998	2	2
IPI00394926.1	POLD3	DNA polymerase delta subunit 3	0.9999	2	2
IPI00009901.1	NUTF2	Nuclear transport factor 2	0.9991	2	2
IPI00219512.2	UCHL5	Isoform 2 of Ubiquitin carboxyl-terminal hydrolase isozyme L5	0.9985	2	2
IPI00005663.4	HISPPD2A	Isoform 7 of Inositol hexakisphosphate and diphosphoinositol-pentakisphosphate kinase 1	0.9972	2	2
IPI00015952.2	EIF4G2	cDNA FLJ59571: highly similar to Eukaryotic translation initiation factor 4gamma 2	0.9958	2	2
IPI00377161.8	HIBCH	Isoform 2 of 3-hydroxyisobutyryl-CoA hydrolase: mitochondrial	0.9659	2	2
IPI00045207.2	NACC1	Nucleus accumbens-associated protein 1	0.9722	2	2
IPI00002816.1	CTSF	Cathepsin F	1	2	2
IPI00030919.3	MAPKSP1	Mitogen-activated protein kinase scaffold protein 1	0.999	2	2
IPI00010438.2	SNAP23	Isoform SNAP-23a of Synaptosomal-associated protein 23	0.9825	2	1
IPI00742890.5	C5orf44	Isoform 3 of UPF0533 protein C5orf44	0.9998	2	2
IPI00029665.8	MMAB	Cob(I)yrinic acid a:c-diamide adenosyltransferase: mitochondrial	0.9773	2	1
IPI00022442.2	NDUFAB1	Acyl carrier protein: mitochondrial	0.9362	2	2
IPI00329389.8	RPL6	60S ribosomal protein L6	0.9999	2	2
IPI00012891.1	PHKG2	Phosphorylase b kinase gamma catalytic chain: testis/liver isoform	0.9999	2	2
IPI00027397.3	HN1L	Isoform 1 of Hematological and neurological expressed 1-like protein	0.9998	2	2
IPI00306159.7	MECR	Trans-2-enoyl-CoA reductase: mitochondrial	1	2	2
IPI00006957.3	DHRS7	Isoform 1 of Dehydrogenase/reductase SDR family member 7	1	2	2
IPI00026271.5	RPS14	40S ribosomal protein S14	0.9985	2	2
IPI00010153.5	RPL23	60S ribosomal protein L23	0.9985	2	2
IPI00401285.1	DNLZ	DNL-type zinc finger protein	0.9773	2	2
IPI00001661.3	RCC1	regulator of chromosome condensation 1 isoform a	1	2	2
IPI00329352.3	NOMO3;NOMO1	Nodal modulator 1	1	2	2
IPI00464952.2	SFRS11	Splicing factor: arginine/serine-rich 11	0.9985	2	2
IPI00008726.4	IREB2	Iron-responsive element-binding protein 2	0.9995	2	2
IPI00019988.1	SGSH	N-sulphoglucosamine sulphohydrolase	1	2	2
IPI00101734.5	FAM105B	Protein FAM105B	0.9582	2	2
IPI00027969.1	VHL	Isoform 1 of Von Hippel-Lindau disease tumor suppressor	0.9734	2	1
IPI00016513.5	RAB10	Ras-related protein Rab-10	1	2	2
IPI00014808.1	PAFAH1B3	Platelet-activating factor acetylhydrolase IB subunit gamma	1	2	2
IPI00029473.5	C17orf75	Protein Njmu-R1	0.9997	2	2
IPI00018009.2	EDC3	Enhancer of mRNA-decapping protein 3	0.9722	2	2
IPI00549381.5	MRPL1	39S ribosomal protein L1: mitochondrial	0.9999	2	2
IPI00328658.3	ASH2L	Isoform 1 of Set1/Ash2 histone methyltransferase complex subunit ASH2	0.9905	2	2
IPI00303174.1	HGD	Homogentisate 1:2-dioxygenase	0.9958	2	1
IPI00028006.1	PSMB2	Proteasome subunit beta type-2	1	2	2
IPI00012578.1	KPNA4	Importin subunit alpha-4	1	2	2
IPI00017963.1	SNRPD2	Small nuclear ribonucleoprotein Sm D2	0.9931	2	2
IPI00000684.4	UAP1	Isoform AGX2 of UDP-N-acetylhexosamine pyrophosphorylase	1	2	2
IPI00028685.4	VSTM2L	Isoform 1 of V-set and transmembrane domain-containing protein 2-like protein	0.9139	2	1
IPI00012835.1	CTBP1	C-terminal-binding protein 1	0.9997	2	2
IPI00177428.1	CHCHD4	Isoform 2 of Mitochondrial intermembrane space import and assembly protein 40	1	2	2
IPI00244391.3	XDH	Xanthine dehydrogenase/oxidase	0.9999	2	2
IPI00169280.5	AKR7L	Isoform 1 of Aflatoxin B1 aldehyde reductase member 4	0.9996	2	2
IPI00221106.5	SF3B2	splicing factor 3B subunit 2	0.9999	2	2
IPI00014589.1	CLTB	Isoform Brain of Clathrin light chain B	1	2	2
IPI00028091.3	ACTR3	Actin-related protein 3	1	2	2
IPI00003377.1	SFRS7	Isoform 1 of Splicing factor: arginine/serine-rich 7	0.9961	2	2
IPI00291669.3	UBLCP1	Ubiquitin-like domain-containing CTD phosphatase 1	0.9996	2	2
IPI00013146.1	MRPS22	28S ribosomal protein S22: mitochondrial	1	2	2
IPI00063827.1	ABHD14B	Isoform 1 of Abhydrolase domain-containing protein 14B	1	2	2
IPI00217481.3	GPR126	Isoform 1 of Probable G-protein coupled receptor 126	0.9398	2	2
IPI00011770.1	NDUFA4	NADH dehydrogenase [ubiquinone] 1 alpha subcomplex subunit 4	1	2	2
IPI00004489.1	MOCS3	Adenylyltransferase and sulfurtransferase MOCS3	1	2	2
IPI00017816.2	ATP5S	ATP synthase subunit s: mitochondrial	0.976	2	2
IPI00444272.2	LIFR	Leukemia inhibitory factor receptor	0.9374	2	2
IPI00024658.3	OTUD7B	OTU domain-containing protein 7B	0.9139	2	2
IPI00401264.5	ERP44	Endoplasmic reticulum resident protein ERp44	1	2	2
IPI00016112.6	PXDN	Isoform 1 of Peroxidasin homolog	0.9607	2	1
IPI00011631.6	ZW10	Centromere/kinetochore protein zw10 homolog	1	2	2
IPI00005657.1	PFDN6	Prefoldin subunit 6	0.9985	2	2
IPI00375527.4	IMPDH1	inosine monophosphate dehydrogenase 1 isoform a	1	2	2
IPI00006980.1	C14orf166	UPF0568 protein C14orf166	1	2	2
IPI00217357.2	CCAR1	Isoform 1 of Cell division cycle and apoptosis regulator protein 1	0.9386	2	2
IPI00019906.1	BSG	Isoform 2 of Basigin	0.9936	2	2
IPI00299977.1	PHPT1	14 kDa phosphohistidine phosphatase	0.9999	2	2
IPI00334579.2	MRPL43	cDNA FLJ61386: highly similar to Homo sapiens mitochondrial ribosomal protein L43 (MRPL43): transcript variant 4: mRNA	1	2	2
IPI00432753.2	TOR2A	Isoform 1 of Torsin-2A	1	2	1
IPI00448095.3	DCXR	L-xylulose reductase	0.9995	2	2
IPI00012493.1	RPS20	40S ribosomal protein S20	0.9683	2	1
IPI00007280.10	ARPC5	Isoform 2 of Actin-related protein 2/3 complex subunit 5	0.9865	2	2
IPI00174438.2	FBXO45	F-box/SPRY domain-containing protein 1	0.9658	2	2
IPI00027808.1	POLR2B	DNA-directed RNA polymerase II subunit RPB2	0.9757	2	2
IPI00160369.5	PICK1	PRKCA-binding protein	0.9985	2	2
IPI00005511.1	PHF5A	PHD finger-like domain-containing protein 5A	0.9985	2	2
IPI00167515.1	PTGR2	Isoform 1 of Prostaglandin reductase 2	1	2	2
IPI00397904.6	NUP93	Nuclear pore complex protein Nup93	0.9999	2	2
IPI00152503.1	DTX3L	Protein deltex-3-like	0.9847	2	2
IPI00334907.3	PITPNB	Isoform 1 of Phosphatidylinositol transfer protein beta isoform	0.9901	2	2
IPI00026952.1	PKP3	Plakophilin-3	1	2	2
IPI00018272.3	PNPO	Pyridoxine-5'-phosphate oxidase	0.9951	2	2
IPI00295542.5	NUCB1	Nucleobindin-1	0.9996	2	2
IPI00020950.3	PPM1A	Isoform Alpha-1 of Protein phosphatase 1A	0.9492	2	2
IPI00033143.1	EIF3K	Eukaryotic translation initiation factor 3 subunit K	1	2	2
IPI00032879.1	TAF9	Adenylate kinase isoenzyme 6	0.9162	2	2
IPI00057035.3	TRMT61B	Potential tRNA (adenine-N(1)-)-methyltransferase catalytic subunit TRMT61B	1	2	2
IPI00175416.8	PLCH1	Isoform 1 of 1-phosphatidylinositol-4:5-bisphosphate phosphodiesterase eta-1	0.9773	2	2
IPI00219616.7	PRPS1	Ribose-phosphate pyrophosphokinase 1	0.9985	2	1
IPI00104341.4	EPHX2	cDNA FLJ59619: highly similar to Epoxide hydrolase 2	0.9912	2	2
IPI00479306.1	PSMB5	Proteasome subunit beta type-5	1	2	2
IPI00059764.4	ZNF428	Isoform 1 of Zinc finger protein 428	1	2	2
IPI00023779.1	NIT1	Isoform 2 of Nitrilase homolog 1	0.9943	2	2
IPI00024705.1	GIPC1	PDZ domain-containing protein GIPC1	1	2	2
IPI00790263.1	NMD3	13 kDa protein	0.9991	2	2
IPI00028413.8	ITIH3	Isoform 1 of Inter-alpha-trypsin inhibitor heavy chain H3	0.9852	2	2
IPI00010882.3	DFFA	Isoform DFF45 of DNA fragmentation factor subunit alpha (Fragment)	1	2	2
IPI00003373.1	OCLN	Occludin	0.9398	2	1
IPI00023330.3	KIAA1468	Isoform 2 of LisH domain and HEAT repeat-containing protein KIAA1468	0.9799	2	2
IPI00010130.3	GLUL	Glutamine synthetase	1	2	2
IPI00011898.3	EIF2B5	Translation initiation factor eIF-2B subunit epsilon	0.9998	2	2
IPI00017841.3	OLFM1	Isoform 1 of Noelin	0.9799	2	2
IPI00007691.1	TRAPPC4	Trafficking protein particle complex subunit 4	1	2	2
IPI00029817.1	NEU1	Sialidase-1	0.9812	2	1
IPI00030255.1	PLOD3	Procollagen-lysine:2-oxoglutarate 5-dioxygenase 3	0.9896	2	2
IPI00291262.3	CLU	Isoform 1 of Clusterin	0.9985	2	1
IPI00031821.1	ITM2B	Integral membrane protein 2B	0.9918	2	1
IPI00016832.1	PSMA1	Isoform Short of Proteasome subunit alpha type-1	1	2	2
IPI00250297.3	AASDHPPT	L-aminoadipate-semialdehyde dehydrogenase-phosphopantetheinyl transferase	0.9994	2	2
IPI00027438.2	FLOT1	Flotillin-1	0.9999	2	2
IPI00103415.1	STAT5B	Signal transducer and activator of transcription 5B	1	2	2
IPI00219153.4	RPL22	60S ribosomal protein L22	0.9891	2	1
IPI00029266.1	SNRPE	Small nuclear ribonucleoprotein E	1	2	1
IPI00012828.3	ACAA1	3-ketoacyl-CoA thiolase: peroxisomal	0.999	2	2
IPI00299263.5	ARFGAP3	ADP-ribosylation factor GTPase-activating protein 3	1	2	2
IPI00026813.1	FNTA	Isoform 1 of Protein farnesyltransferase/geranylgeranyltransferase type-1 subunit alpha	1	2	2
IPI00041959.5	PHF21A	Isoform 2 of PHD finger protein 21A	0.9672	2	2
IPI00009737.1	RRAGD	Isoform 1 of Ras-related GTP-binding protein D	1	2	2
IPI00009730.1	MID1IP1	Mid1-interacting protein 1	1	2	2
IPI00038378.5	ENOPH1	Isoform 1 of Enolase-phosphatase E1	1	2	2
IPI00297477.3	SNRPA1	U2 small nuclear ribonucleoprotein A'	0.9998	2	2
IPI00218414.5	CA2	Carbonic anhydrase 2	0.9958	2	2
IPI00011307.4	MTHFD2	Bifunctional methylenetetrahydrofolate dehydrogenase/cyclohydrolase: mitochondrial	1	2	2
IPI00003309.4	POLR2H	DNA-directed RNA polymerases I: II: and III subunit RPABC3	0.9999	2	2
IPI00000005.1	NRAS	GTPase NRas	1	2	2
IPI00007188.5	SLC25A5	ADP/ATP translocase 2	0.9997	2	2
IPI00234793.3	KCTD15	cDNA FLJ61112: highly similar to BTB/POZ domain-containing protein KCTD15	0.9985	2	2
IPI00022002.6	MRPS27	cDNA FLJ54536: highly similar to Mitochondrial 28S ribosomal protein S27	1	2	2
IPI00400983.3	KCTD21	BTB/POZ domain-containing protein KCTD21	1	2	2
IPI00001640.1	N6AMT1	N(6)-adenine-specific DNA methyltransferase 1	1	2	2
IPI00333068.4	ARPC1A;ARPC1B	Actin-related protein 2/3 complex subunit 1A	0.9929	2	2
IPI00179187.3	DNAJA3	Isoform 2 of DnaJ homolog subfamily A member 3: mitochondrial	0.9999	2	2
IPI00215884.4	SFRS1	Isoform ASF-1 of Splicing factor: arginine/serine-rich 1	0.9972	2	2
IPI00328236.7	VPS39	Isoform 1 of Vam6/Vps39-like protein	0.9999	2	2
IPI00005104.1	CHUK	Inhibitor of nuclear factor kappa-B kinase subunit alpha	1	2	2
IPI00028931.2	DSG2	Desmoglein-2	0.9446	2	1
IPI00007019.1	PPIL1	Peptidyl-prolyl cis-trans isomerase-like 1	0.9995	2	2
IPI00021785.2	COX5B	Cytochrome c oxidase subunit 5B: mitochondrial	0.9997	2	2
IPI00023727.1	KIF3C	Kinesin-like protein KIF3C	0.9439	2	2
IPI00007257.4	CLSTN1	Isoform 2 of Calsyntenin-1 (Fragment)	0.9839	2	2
IPI00305438.3	VPS16	Isoform 1 of Vacuolar protein sorting-associated protein 16 homolog	0.9999	2	2
IPI00411514.2	RABL4	Putative uncharacterized protein RABL4 (Fragment)	0.925	2	2
IPI00465308.3	PIGS	Isoform 1 of GPI transamidase component PIG-S	0.9999	2	2
IPI00217362.2	TPRKB	Isoform 3 of TP53RK-binding protein	0.9582	2	2
IPI00008438.1	RPS10	40S ribosomal protein S10	1	2	2
IPI00217023.2	MMAA	MMAA protein	0.9999	2	2
IPI00001651.4	POGK	Pogo transposable element with KRAB domain	0.9961	2	2
IPI00413778.7	FKBP1A	FKBP1A protein	1	2	2
IPI00013981.4	YES1	Proto-oncogene tyrosine-protein kinase Yes	0.9632	2	1
IPI00021167.3	PRKRA	Isoform 1 of Interferon-inducible double stranded RNA-dependent protein kinase activator A	0.9999	2	2
IPI00456758.4	RPL27A	60S ribosomal protein L27a	0.9905	2	2
IPI00033025.9	2015-09-07	51 kDa protein	1	2	2
IPI00009305.1	GNPDA1	Glucosamine-6-phosphate isomerase 1	0.9786	2	2
IPI00003438.2	DNAJC8	DnaJ homolog subfamily C member 8	0.9919	2	2
IPI00216461.5	ACYP2	Acylphosphatase-2	0.9999	2	2
IPI00645805.4	IVD	Isovaleryl-CoA dehydrogenase: mitochondrial	1	2	2
IPI00014439.4	QDPR	Dihydropteridine reductase	0.9999	2	2
IPI00514301.3	CASK	Isoform 1 of Peripheral plasma membrane protein CASK	1	2	2
IPI00549169.4	C7orf36	Uncharacterized protein C7orf36	1	2	2
IPI00329615.5	ISCA1	HESB like domain containing 2: isoform CRA_b	0.9999	2	2
IPI00221035.4	BTF3	Isoform 1 of Transcription factor BTF3	0.9996	2	2
IPI00240675.2	PDCD4	programmed cell death 4 isoform 2	1	2	2
IPI00385156.2	ISYNA1	Putative uncharacterized protein ISYNA1	1	2	2
IPI00102377.3	ANKRD27	Ankyrin repeat domain-containing protein 27	0.9632	2	2
IPI00003647.1	RAD1	Isoform 1 of Cell cycle checkpoint protein RAD1	0.9999	2	2
IPI00019495.1	DYNLT1	Dynein light chain Tctex-type 1	1	2	2
IPI00013195.1	MRPL49	39S ribosomal protein L49: mitochondrial	0.9999	2	2
IPI00020124.1	PI4K2A	Phosphatidylinositol 4-kinase type 2-alpha	0.9993	2	2
IPI00456048.4	COMMD2	COMM domain-containing protein 2	0.9547	2	2
IPI00217871.4	ALDH4A1	Delta-1-pyrroline-5-carboxylate dehydrogenase: mitochondrial	1	2	2
IPI00464999.2	HEATR6	HEAT repeat-containing protein 6	0.9905	2	2
IPI00298949.1	GAK	Cyclin G-associated kinase	0.9999	2	2
IPI00398957.5	ANKRD52	Serine/threonine-protein phosphatase 6 regulatory ankyrin repeat subunit C	0.9994	2	2
IPI00216085.3	COX6B1	Cytochrome c oxidase subunit 6B1	1	2	2
IPI00025333.4	CIAPIN1	Isoform 3 of Anamorsin	0.9993	2	2
IPI00166873.3	C9orf23	Alba-like protein C9orf23	0.9386	2	1
IPI00029485.2	DCTN1	Isoform p150 of Dynactin subunit 1	0.9999	2	2
IPI00026496.3	NPM3	Nucleoplasmin-3	0.9999	1	1
IPI00016458.2	L2HGDH	Isoform 1 of L-2-hydroxyglutarate dehydrogenase: mitochondrial	0.9972	1	1
IPI00219229.3	LSM3	U6 snRNA-associated Sm-like protein LSm3	0.9931	1	1
IPI00001091.4	AFG3L2	AFG3-like protein 2	0.962	1	1
IPI00410324.2	LSM12	Isoform 1 of Protein LSM12 homolog	0.9999	1	1
IPI00784119.1	ATP6AP1	V-type proton ATPase subunit S1	0.9734	1	1
IPI00005162.3	ARPC3	Actin-related protein 2/3 complex subunit 3	0.9557	1	1
IPI00027035.2	ZNF512;GPN1	GPN-loop GTPase 1 isoform a	0.9999	1	1
IPI00301204.2	RDH13	Retinol dehydrogenase 13	0.9931	1	1
IPI00015361.1	PFDN5	Prefoldin subunit 5	0.9985	1	1
IPI00003168.1	PRPSAP2	Phosphoribosyl pyrophosphate synthetase-associated protein 2	0.9722	1	1
IPI00178767.1	SMPDL3A	Acid sphingomyelinase-like phosphodiesterase 3a	0.9532	1	1
IPI00031647.2	PDCD2L	Programmed cell death protein 2-like	0.9865	1	1
IPI00219077.4	LTA4H	Isoform 1 of Leukotriene A-4 hydrolase	0.9945	1	1
IPI00025721.3	COPS3	COP9 signalosome complex subunit 3	0.9999	1	1
IPI00016249.4	FXR1	Isoform 1 of Fragile X mental retardation syndrome-related protein 1	0.9972	1	1
IPI00027192.6	PLOD1	cDNA: FLJ79184: highly similar to Procollagen-lysine: 2-oxoglutarate 5-dioxygenase 1	0.941	1	1
IPI00032439.1	POLR1D	Isoform 1 of DNA-directed RNA polymerases I and III subunit RPAC2	0.9865	1	1
IPI00303753.6	C1orf163	Hcp beta-lactamase-like protein C1orf163	0.9422	1	1
IPI00069693.4	-	Putative uncharacterized protein RPL14P1	0.9999	1	1
IPI00028392.3	C1orf116	Isoform 1 of Specifically androgen-regulated gene protein	0.9958	1	1
IPI00102979.2	ORAOV1	Oral cancer overexpressed protein 1	0.9985	1	1
IPI00031107.1	HSDL2	Isoform 2 of Hydroxysteroid dehydrogenase-like protein 2	0.9999	1	1
IPI00747849.2	ATP1B1	Isoform 1 of Sodium/potassium-transporting ATPase subunit beta-1	0.9865	1	1
IPI00642790.4	PLA1A	Isoform 1 of Phospholipase A1 member A	0.9999	1	1
IPI00037283.3	DNM1L	Isoform 5 of Dynamin-1-like protein	0.9483	1	1
IPI00030782.1	STAT6	Isoform 1 of Signal transducer and activator of transcription 6	0.9014	1	1
IPI00015955.5	EXOSC5	Exosome complex exonuclease RRP46	0.9972	1	1
IPI00002203.6	BCCIP	Isoform 1 of BRCA2 and CDKN1A-interacting protein	0.9722	1	1
IPI00305296.2	C12orf44	UPF0453 protein C12orf44	0.9999	1	1
IPI00025346.3	PEX14	Isoform 1 of Peroxisomal membrane protein PEX14	0.9386	1	1
IPI00478230.2	RBBP5	cDNA FLJ59722: highly similar to Retinoblastoma-binding protein 5	0.9374	1	1
IPI00031570.1	C1orf57	Nucleoside-triphosphatase C1orf57	0.9696	1	1
IPI00174852.4	MED20	Mediator of RNA polymerase II transcription subunit 20	0.9999	1	1
IPI00217471.3	HBE1	Hemoglobin subunit epsilon	0.9683	1	1
IPI00328276.1	CDK5RAP1	Isoform 1 of CDK5 regulatory subunit-associated protein 1	0.9985	1	1
IPI00436705.7	MORC3	MORC family CW-type zinc finger 3	0.9972	1	1
IPI00028957.2	UBE4A	Isoform 2 of Ubiquitin conjugation factor E4 A	0.9865	1	1
IPI00604708.1	PMS2	Postmeiotic segregation increased 2 nirs variant 5	0.9999	1	1
IPI00329679.3	ZWILCH	Isoform 1 of Protein zwilch homolog	0.9812	1	1
IPI00030781.1	STAT1	Isoform Alpha of Signal transducer and activator of transcription 1-alpha/beta	0.9985	1	1
IPI00000811.2	PSMB6	Proteasome subunit beta type-6	0.9985	1	1
IPI00329107.4	NR2C2AP	cDNA FLJ60181: highly similar to Homo sapiens TR4 orphan receptor associated protein TRA16: mRNA	0.9958	1	1
IPI00465054.2	THUMPD1	Putative uncharacterized protein DKFZp686C1054	0.962	1	1
IPI00006648.4	RABGAP1L	Isoform 7 of RAB GTPase-activating protein 1-like	0.9786	1	1
IPI00024083.3	NAAA	Isoform 1 of N-acylethanolamine-hydrolyzing acid amidase	0.9945	1	1
IPI00030320.4	DDX6	Probable ATP-dependent RNA helicase DDX6	0.9595	1	1
IPI00013888.1	ITM2A	Integral membrane protein 2A	0.9734	1	1
IPI00019812.1	PPP5C	Serine/threonine-protein phosphatase 5	0.9985	1	1
IPI00020539.1	PGPEP1	Pyroglutamyl-peptidase 1	0.9972	1	1
IPI00219889.2	UQCC	Isoform 2 of Ubiquinol-cytochrome c reductase complex chaperone CBP3 homolog	0.9139	1	1
IPI00029750.1	RPS24	Isoform 1 of 40S ribosomal protein S24	0.9786	1	1
IPI00456965.5	COQ5	Isoform 1 of Ubiquinone biosynthesis methyltransferase COQ5: mitochondrial	0.9931	1	1
IPI00007941.4	HEXIM1	Protein HEXIM1	0.9582	1	1
IPI00438170.3	SNX12	Isoform 1 of Sorting nexin-12	0.9985	1	1
IPI00032460.3	LSM2	U6 snRNA-associated Sm-like protein LSm2	0.9025	1	1
IPI00028160.1	HMBS	Isoform 1 of Porphobilinogen deaminase	0.9999	1	1
IPI00301434.4	BOLA2B;BOLA2	BolA-like protein 2	0.9985	1	1
IPI00328748.4	MANF	mesencephalic astrocyte-derived neurotrophic factor	0.9243	1	1
IPI00013676.1	SQSTM1	Phosphotyrosine independent ligand p62B for the Lck SH2 domain B-cell isoform (Fragment)	0.9999	1	1
IPI00295501.1	CNOT8	CCR4-NOT transcription complex subunit 8	0.9683	1	1
IPI00032293.1	CST3	Cystatin-C	0.9958	1	1
IPI00021954.1	GBF1	Golgi-specific brefeldin A-resistance guanine nucleotide exchange factor 1	0.9958	1	1
IPI00446874.3	ACAD8	Acyl-Coenzyme A dehydrogenase family: member 8: isoform CRA_a	0.9891	1	1
IPI00385985.1	-	Ig lambda chain V-III region LOI	0.9508	1	1
IPI00009480.1	COPS8	COP9 signalosome complex subunit 8	0.9905	1	1
IPI00098827.1	HSPB11	Heat shock protein beta-11	0.9985	1	1
IPI00107722.6	MCEE	Methylmalonyl-CoA epimerase: mitochondrial	0.9945	1	1
IPI00013809.1	GSTZ1	Maleylacetoacetate isomerase	0.9127	1	1
IPI00045051.3	PURB	Transcriptional activator protein Pur-beta	0.9786	1	1
IPI00018198.3	HAUS2	Isoform 1 of HAUS augmin-like complex subunit 2	0.9985	1	1
IPI00006713.1	DNAJC3	DnaJ homolog subfamily C member 3	0.9645	1	1
IPI00018434.1	TSG101	Isoform 1 of Tumor susceptibility gene 101 protein	0.9985	1	1
IPI00095891.2	GNAS	Isoform XLas-1 of Guanine nucleotide-binding protein G(s) subunit alpha isoforms XLas	0.9891	1	1
IPI00074225.8	AP3S2;C15orf38	UPF0552 protein C15orf38	0.9709	1	1
IPI00292140.4	CASP3	Caspase-3	0.9999	1	1
IPI00030328.1	SRR	Serine racemase	0.9972	1	1
IPI00465045.2	DIP2B	Isoform 1 of Disco-interacting protein 2 homolog B	0.9945	1	1
IPI00005158.1	LONP1	Lon protease homolog: mitochondrial	0.9945	1	1
IPI00221101.4	SI	Sucrase-isomaltase: intestinal	0.9878	1	1
IPI00217882.3	SORT1	Sortilin	0.9208	1	1
IPI00298423.3	PDHX	Pyruvate dehydrogenase protein X component: mitochondrial	0.9958	1	1
IPI00022058.3	ASAP2	Isoform 1 of Arf-GAP with SH3 domain: ANK repeat and PH domain-containing protein 2	0.9999	1	1
IPI00291313.2	NUDT8	Isoform 1 of Nucleoside diphosphate-linked moiety X motif 8: mitochondrial	0.9747	1	1
IPI00294627.3	SF1	Isoform 2 of Splicing factor 1	0.9985	1	1
IPI00100748.4	HSPBP1	cDNA FLJ55382: highly similar to Hsp70-binding protein 1	0.9683	1	1
IPI00783656.1	MRPL38	39S ribosomal protein L38: mitochondrial	0.9931	1	1
IPI00003527.5	SLC9A3R1	Na(+)/H(+) exchange regulatory cofactor NHE-RF1	0.9999	1	1
IPI00014831.1	PDK1	[Pyruvate dehydrogenase [lipoamide]] kinase isozyme 1: mitochondrial	0.9972	1	1
IPI00031424.1	PI4KA	Isoform 2 of Phosphatidylinositol 4-kinase alpha	0.9985	1	1
IPI00013949.1	SGTA	Small glutamine-rich tetratricopeptide repeat-containing protein alpha	0.9985	1	1
IPI00031563.4	DDA1	DET1- and DDB1-associated protein 1	0.9945	1	1
IPI00025239.2	NDUFS2	NADH dehydrogenase [ubiquinone] iron-sulfur protein 2: mitochondrial	0.9999	1	1
IPI00061680.1	CCDC101	SAGA-associated factor 29 homolog	0.976	1	1
IPI00103142.1	NUDCD2	NudC domain-containing protein 2	0.9839	1	1
IPI00215651.1	GUCY1B3	Isoform HSGC-2 of Guanylate cyclase soluble subunit beta-1	0.9709	1	1
IPI00016572.1	SNRPG	Small nuclear ribonucleoprotein G	0.9905	1	1
IPI00165121.2	FAM188A	18 kDa protein	0.9985	1	1
IPI00032851.1	COPZ1	Coatomer subunit zeta-1	0.9972	1	1
IPI00168603.2	CHDH	Choline dehydrogenase: mitochondrial	0.9786	1	1
IPI00025815.2	TARDBP	TDP43	0.9557	1	1
IPI00006592.1	MSRA	Peptide methionine sulfoxide reductase	0.941	1	1
IPI00025718.2	WDR4	Isoform 1 of tRNA (guanine-N(7)-)-methyltransferase subunit WDR4	0.9891	1	1
IPI00419575.6	C7orf20	Protein of unknown function DUF410 family protein	0.9891	1	1
IPI00103654.2	PPP4R2	Isoform 1 of Serine/threonine-protein phosphatase 4 regulatory subunit 2	0.9747	1	1
IPI00100775.1	C11orf67	Isoform 1 of UPF0366 protein C11orf67	0.9999	1	1
IPI00301994.6	FAHD2B	Fumarylacetoacetate hydrolase domain-containing protein 2B	0.9495	1	1
IPI00022462.2	TFRC	Transferrin receptor protein 1	0.9483	1	1
IPI00106913.4	DHRS4	peroxisomal short-chain alcohol dehydrogenase	0.9458	1	1
IPI00375631.6	ISG15	Interferon-induced 17 kDa protein	0.9434	1	1
IPI00031138.3	C2orf7	Protease-associated domain-containing protein of 21 kDa	0.9958	1	1
IPI00180954.4	CIRBP	Cold-inducible RNA-binding protein	0.9999	1	1
IPI00555812.4	GC	Vitamin D-binding protein	0.9999	1	1
IPI00217745.1	FXN	Isoform 2 of Frataxin: mitochondrial	0.9683	1	1
IPI00021537.5	OGFR	Isoform 1 of Opioid growth factor receptor	0.9208	1	1
IPI00002857.2	MAPK14	Isoform CSBP2 of Mitogen-activated protein kinase 14	0.9958	1	1
IPI00302850.4	SNRPD1	Small nuclear ribonucleoprotein Sm D1	0.922	1	1
IPI00478657.4	GRSF1	Isoform 1 of G-rich sequence factor 1	0.9918	1	1
IPI00399254.3	OTUD4	Isoform 1 of OTU domain-containing protein 4	0.9173	1	1
IPI00016634.1	C20orf11	Protein C20orf11	0.9999	1	1
IPI00477957.3	CLYBL	Isoform 1 of Citrate lyase subunit beta-like protein: mitochondrial	0.9999	1	1
IPI00060866.2	AP1S3	Isoform 1 of AP-1 complex subunit sigma-3	0.9557	1	1
IPI00018624.3	ALPK1	cDNA: FLJ22670 fis: clone HSI08684	0.9999	1	1
IPI00181135.4	BCAT2	Branched-chain-amino-acid aminotransferase	0.9508	1	1
IPI00455174.3	RALGAPA2	Isoform 3 of 250 kDa substrate of Akt	0.9999	1	1
IPI00019459.1	MAP3K7IP1	Mitogen-activated protein kinase kinase kinase 7-interacting protein 1	0.9865	1	1
IPI00550020.3	PTMS	Parathymosin	0.9734	1	1
IPI00215997.5	CD9	CD9 antigen	0.9243	1	1
IPI00413895.2	GOLGA2	Golgi autoantigen: golgin subfamily a: 2	0.9918	1	1
IPI00554777.2	ASNS	Asparagine synthetase [glutamine-hydrolyzing]	0.9734	1	1
IPI00018402.1	TBCE	Tubulin-specific chaperone E	0.9302	1	1
IPI00036742.6	KIAA1429	Isoform 1 of Protein virilizer homolog	0.9483	1	1
IPI00025616.1	POLD2	DNA polymerase delta subunit 2	0.9999	1	1
IPI00019888.1	ALDH5A1	Succinate-semialdehyde dehydrogenase: mitochondrial	0.9632	1	1
IPI00215952.4	ENTPD5	Ectonucleoside triphosphate diphosphohydrolase 5	0.9314	1	1
IPI00465044.2	RCC2	Protein RCC2	0.9891	1	1
IPI00465256.4	AK3	GTP:AMP phosphotransferase mitochondrial	0.9999	1	1
IPI00008433.4	RPS5	40S ribosomal protein S5	0.9999	1	1
IPI00007321.2	LYPLA1	cDNA FLJ60607: highly similar to Acyl-protein thioesterase 1	0.9999	1	1
IPI00027166.1	TIMP2	Metalloproteinase inhibitor 2	0.9985	1	1
IPI00293015.3	WDR8	Isoform 1 of WD repeat-containing protein 8	0.9985	1	1
IPI00041325.1	NHP2	H/ACA ribonucleoprotein complex subunit 2	0.9825	1	1
IPI00289807.3	TRNT1	Isoform 1 of tRNA-nucleotidyltransferase 1: mitochondrial	0.9865	1	1
IPI00220835.7	SEC61B	Protein transport protein Sec61 subunit beta	0.9508	1	1
IPI00847596.2	LOC388789	Conserved hypothetical protein	0.9999	1	1
IPI00171152.2	ABHD11	Isoform 4 of Abhydrolase domain-containing protein 11	0.9985	1	1
IPI00297487.1	CTSH	Cathepsin H	0.9985	1	1
IPI00014481.4	AAMP	Angio-associated migratory cell protein	0.9972	1	1
IPI00017669.5	SMARCE1	Isoform 1 of SWI/SNF-related matrix-associated actin-dependent regulator of chromatin subfamily E member 1	0.9999	1	1
IPI00008580.1	SLPI	Antileukoproteinase	0.9545	1	1
IPI00016925.1	C12orf57	Protein C10	0.9709	1	1
IPI00015839.1	RAB20	Ras-related protein Rab-20	0.9582	1	1
IPI00074605.2	NGLY1	Isoform 1 of Peptide-N(4)-(N-acetyl-beta-glucosaminyl)asparagine amidase	0.9985	1	1
IPI00002525.3	NENF	Neudesin	0.9208	1	1
IPI00328178.3	TOM1L2	Isoform 3 of TOM1-like protein 2	0.9852	1	1
IPI00012315.2	NME3	Nucleoside diphosphate kinase 3	0.9734	1	1
IPI00026215.1	FEN1	Flap endonuclease 1	0.9398	1	1
IPI00029754.1	MLH1	DNA mismatch repair protein Mlh1	0.9422	1	1
IPI00397358.4	RPS27	Ribosomal protein S27	0.9931	1	1
IPI00292228.1	GSK3A	Glycogen synthase kinase-3 alpha	0.9999	1	1
IPI00024934.4	MUT	Methylmalonyl-CoA mutase: mitochondrial	0.9985	1	1
IPI00018364.2	RAP2B	Ras-related protein Rap-2b	0.9999	1	1
IPI00026358.3	GABARAPL2	Gamma-aminobutyric acid receptor-associated protein-like 2	0.9891	1	1
IPI00884061.2	LOC552889	hypothetical protein LOC552889	0.9931	1	1
IPI00220063.5	NDUFS5	NADH dehydrogenase [ubiquinone] iron-sulfur protein 5	0.9999	1	1
IPI00023556.3	SSU72	Isoform 1 of RNA polymerase II subunit A C-terminal domain phosphatase SSU72	0.9985	1	1
IPI00295098.3	SRPRB	Signal recognition particle receptor subunit beta	0.9162	1	1
IPI00220901.4	TBC1D4	TBC1 domain family member 4	0.9958	1	1
IPI00027032.1	LYPLA2	Acyl-protein thioesterase 2	0.9471	1	1
IPI00607780.2	PRUNE2	Isoform 2 of Protein prune homolog 2	0.9985	1	1
IPI00016670.3	C11orf59	UPF0404 protein C11orf59	0.9985	1	1
IPI00217493.5	MB	Myoglobin	0.9696	1	1
IPI00298058.1	SUPT5H	Isoform 1 of Transcription elongation factor SPT5	0.9116	1	1
IPI00465233.1	EIF3L	Eukaryotic translation initiation factor 3: subunit E interacting protein	0.9208	1	1
IPI00005824.1	LIN7A	Lin-7 homolog A	0.9865	1	1
IPI00384294.3	UCKL1	Isoform 2 of Uridine-cytidine kinase-like 1	0.9825	1	1
IPI00217053.6	PRRC1	Isoform 3 of Protein PRRC1	0.957	1	1
IPI00013860.3	HIBADH	3-hydroxyisobutyrate dehydrogenase: mitochondrial	0.9999	1	1
IPI00020075.4	ABHD10	Abhydrolase domain-containing protein 10: mitochondrial	0.9999	1	1
IPI00102313.3	SRA1	Steroid receptor RNA activator 1: isoform CRA_a	0.9985	1	1
IPI00412498.2	NAPRT1	52 kDa protein	0.9985	1	1
IPI00022202.3	SLC25A3	Isoform A of Phosphate carrier protein: mitochondrial	0.9386	1	1
IPI00240812.6	PDS5B	165 kDa protein	0.9985	1	1
IPI00023939.1	RABIF	Guanine nucleotide exchange factor MSS4	0.929	1	1
IPI00026530.4	LMAN1	Protein ERGIC-53	0.9999	1	1
IPI00029695.2	SMARCB1	Isoform A of SWI/SNF-related matrix-associated actin-dependent regulator of chromatin subfamily B member 1	0.9105	1	1
IPI00024425.5	KIAA0664	147 kDa protein	0.9326	1	1
IPI00021266.1	RPL23A	60S ribosomal protein L23a	0.9734	1	1
IPI00182138.4	GRN	Isoform 2 of Granulins	0.9999	1	1
IPI00456157.5	PDSS1	Isoform 1 of Decaprenyl-diphosphate synthase subunit 1	0.9999	1	1
