# Supplementary material for: ERG signaling in prostate cancer is driven through PRMT5-dependent methylation of the Androgen Receptor
Source: eLife. 2016 May 16;5:e13964. doi: 10.7554/eLife.13964 (PMC4909395; doi:10.7554/eLife.13964)
Supplement: Supplementary file 3. — DOI: http://dx.doi.org/10.7554/eLife.13964.017 [file elife-13964-supp3.xlsx]

## Sheet: Sheet1
Supplementary file 3: PRMT5 activated pathways
Pathways significantly downregulated by PRMT5 knockdown
(see Figure 2A and Materials and Methods)
GO Pathways	p-value
c-Jun Activation	4.24x10-3
PAX5 Activation	3.17x10-2
PAX2 Activation	3.17x10-2
Oxidative stress	3.17x10-2
SP1 activation	3.17x10-2
SP3 inhibition	3.17x10-2
STAT6 activation	5.33x10-2
GATA4 activation	5.33x10-2
HNF3alpha activation	8.79x10-2
cAMP/Ca(2+)-dependent insulin secretion	8.79x10-2
