# Supplementary figures and images for: ERG signaling in prostate cancer is driven through PRMT5-dependent methylation of the Androgen Receptor
Source: eLife journal article supplement (doi:10.7554/elife.13964), 2016-05-16

Figure 2--figure supplement 2:  
ERG and PRMT5 effects on AR target genes are specific

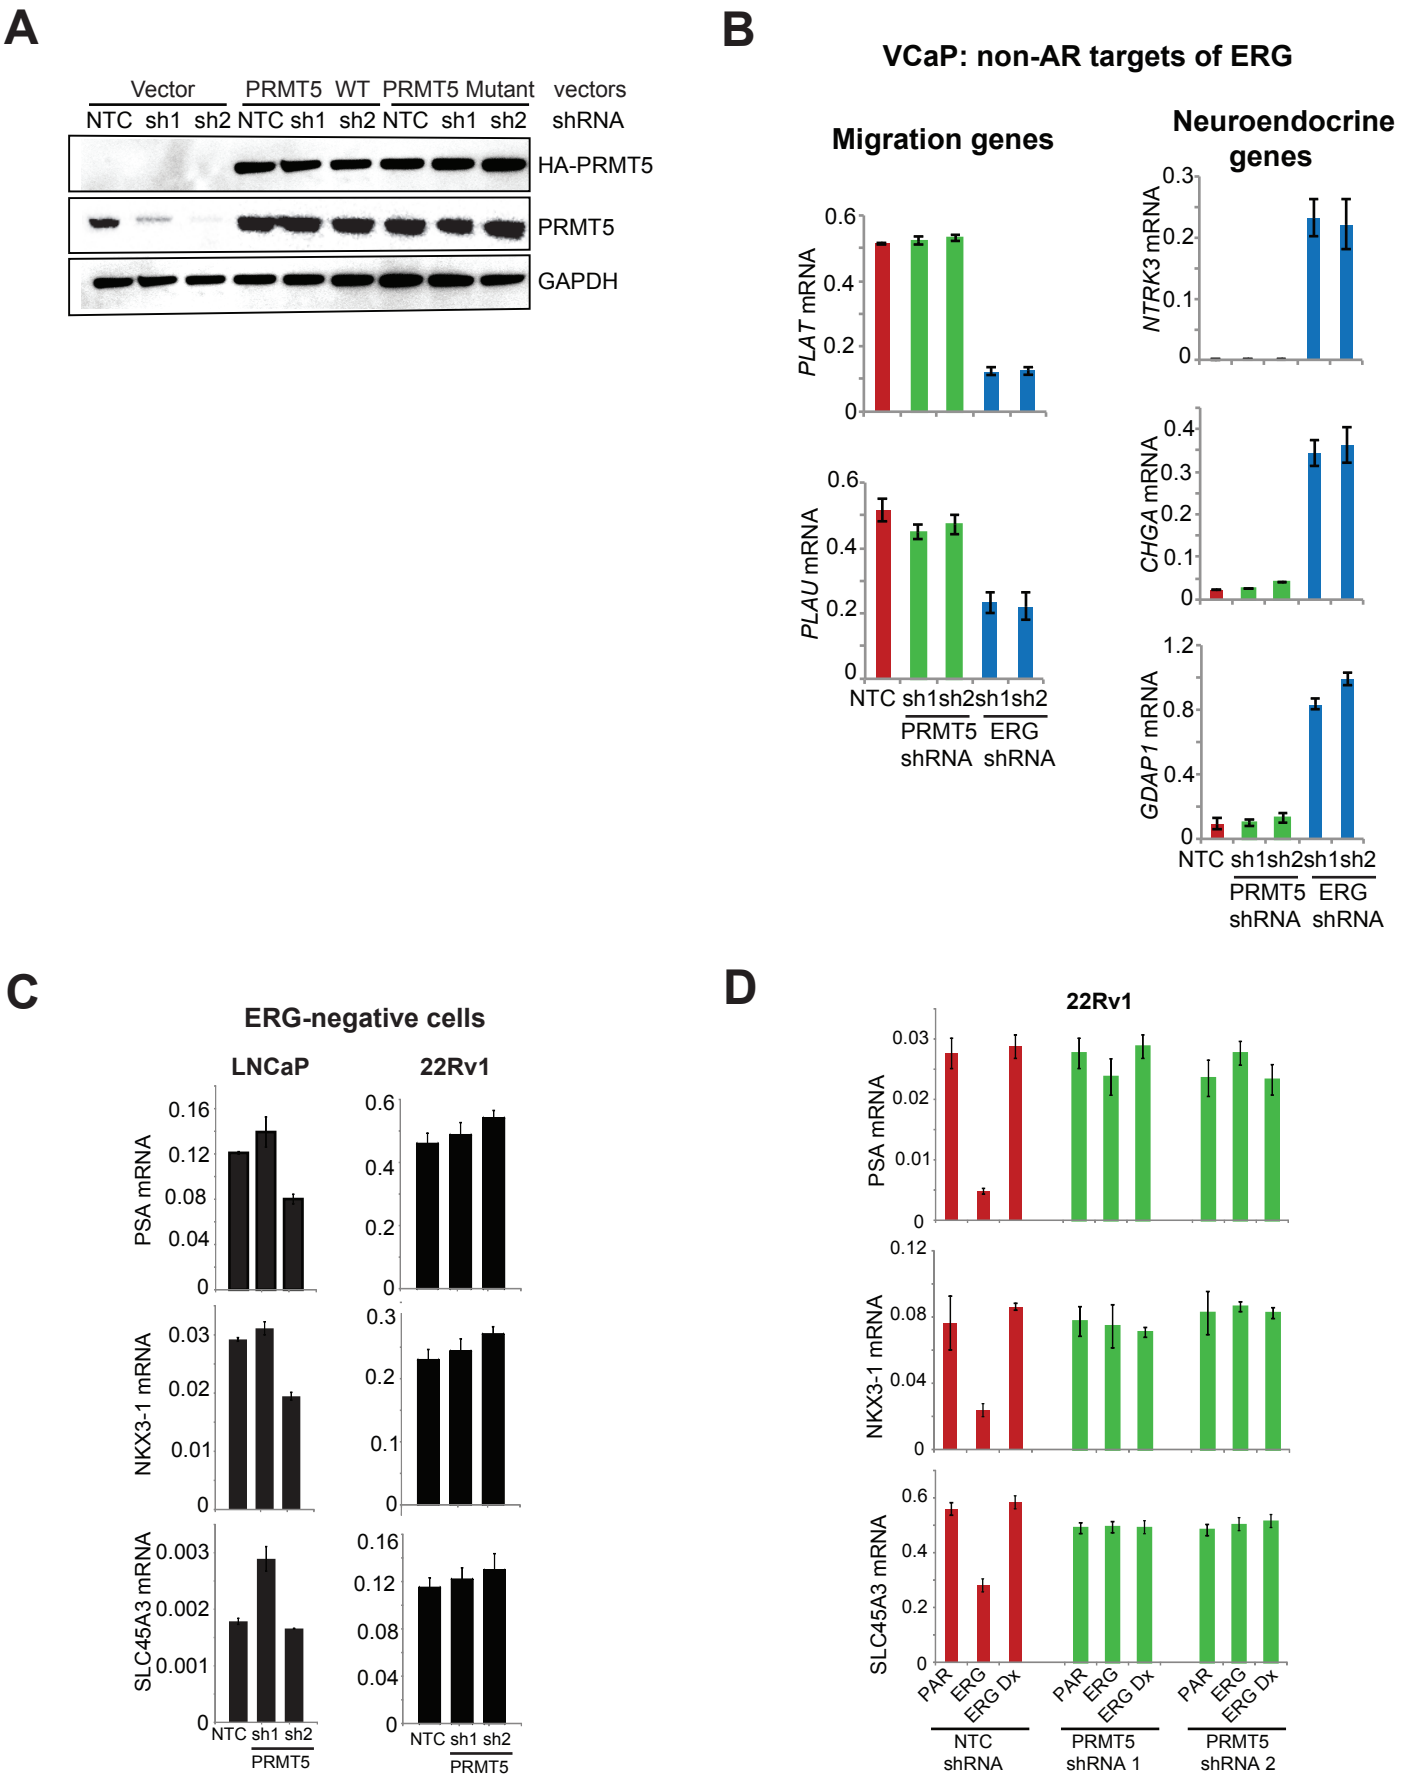

Supplement: supp [file elife-13964-supp-v2.zip]

Figure 3--figure supplement 2: PRMT5 methylates AR in vitro

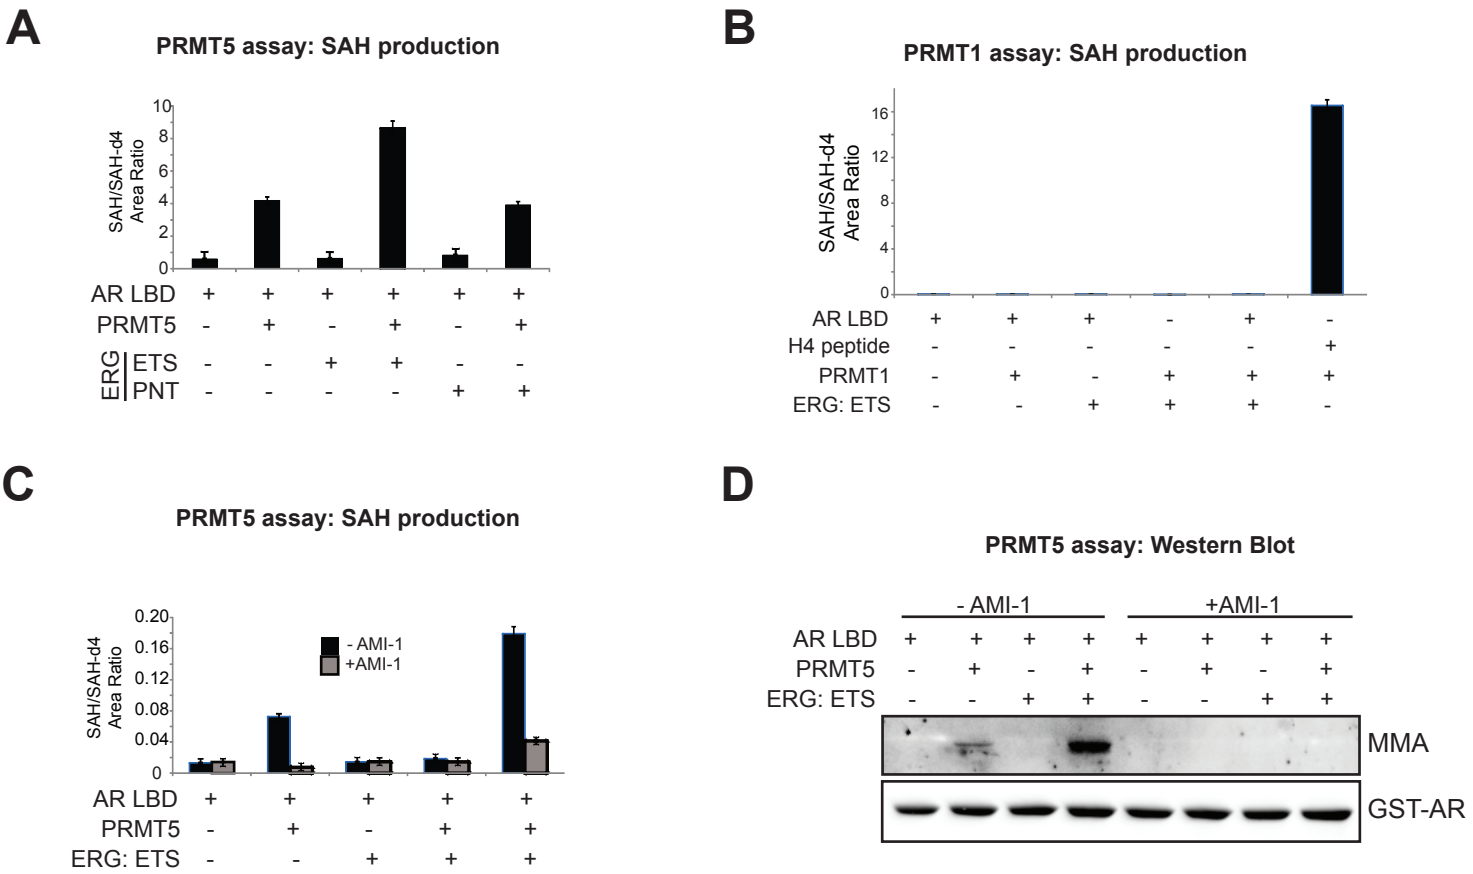

Supplement: supp [file elife-13964-supp-v2.zip]

Figure 3--figure supplement 3:  
AR and ERG expression in RWPE-1, and mutation of AR LBD

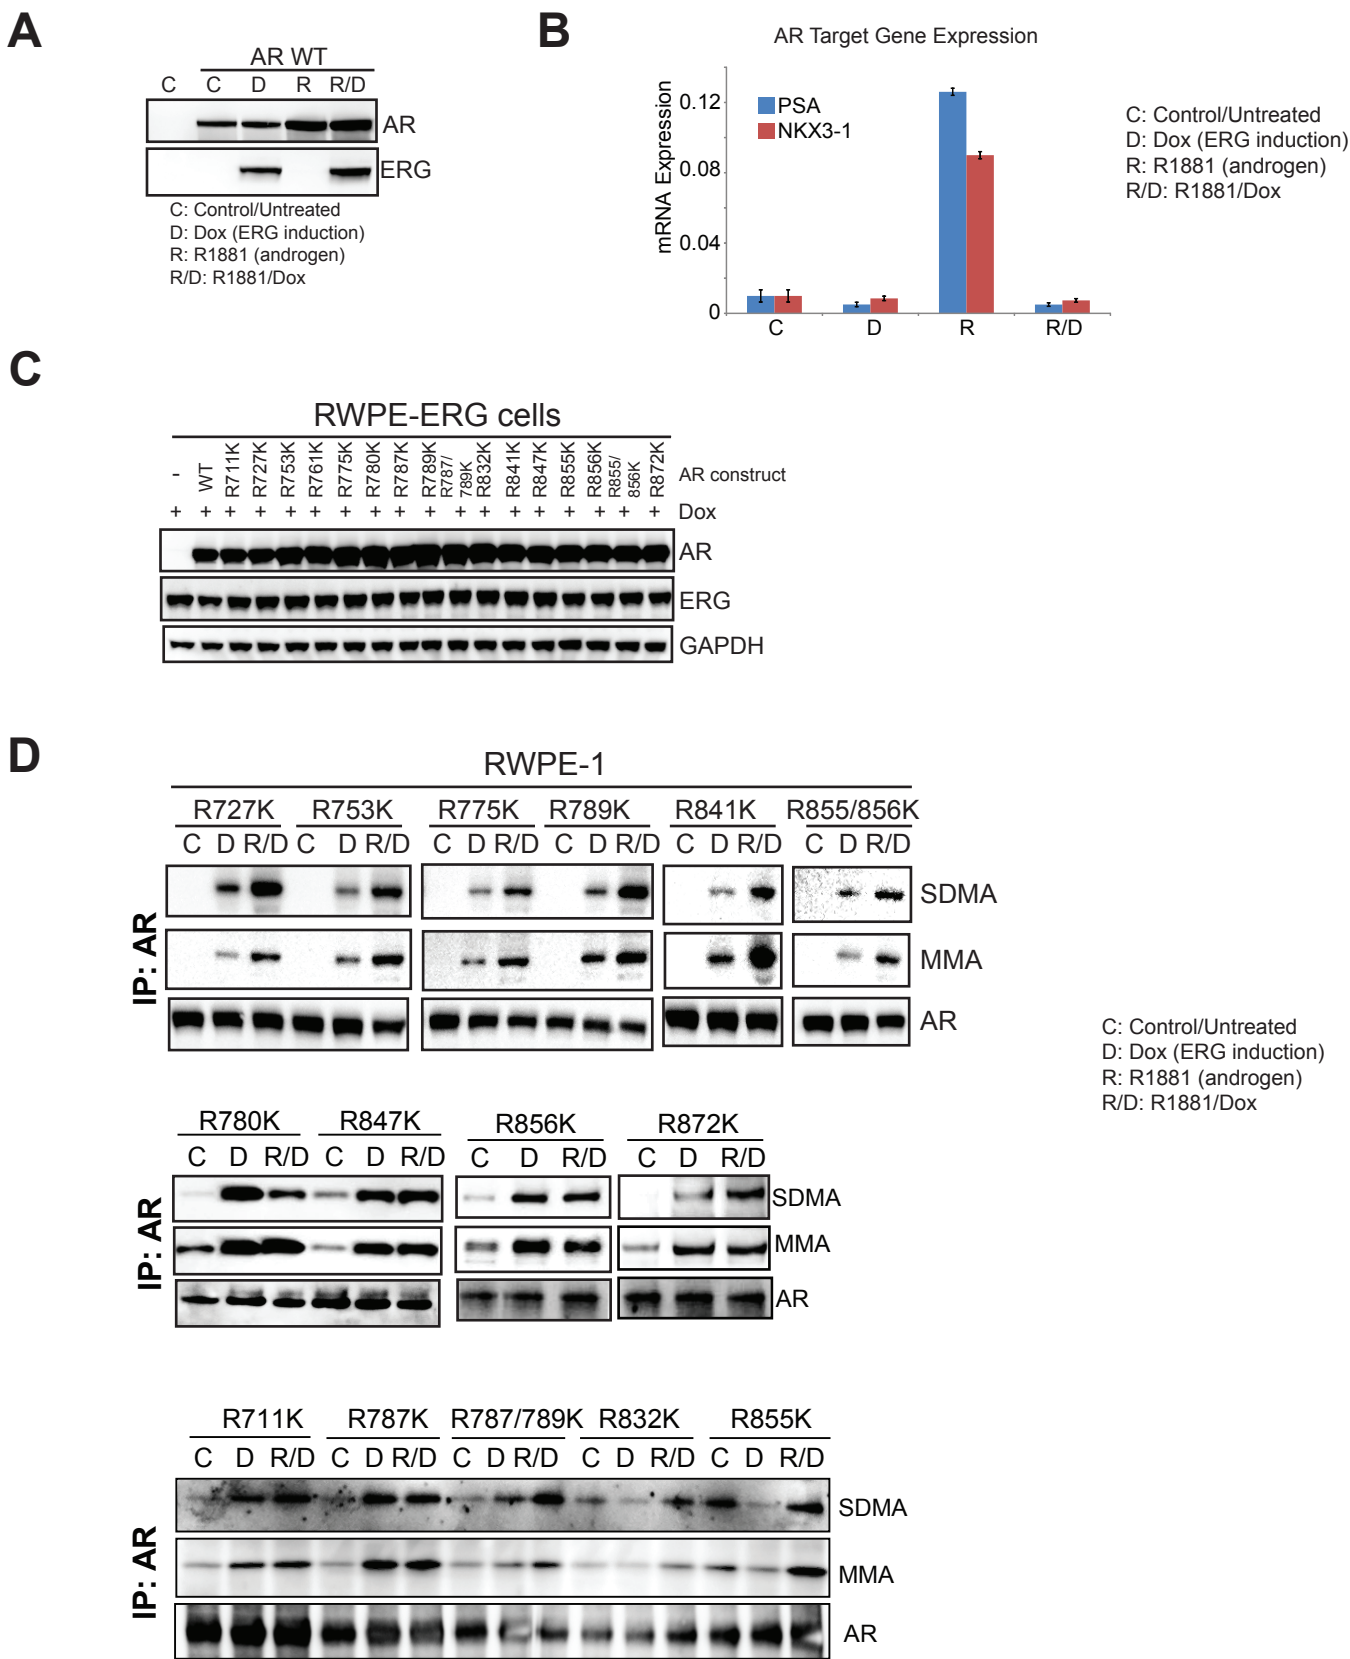

Supplement: supp [file elife-13964-supp-v2.zip]

Figure 2--figure supplement 3: ERG, AR, and PRMT5 recruitment

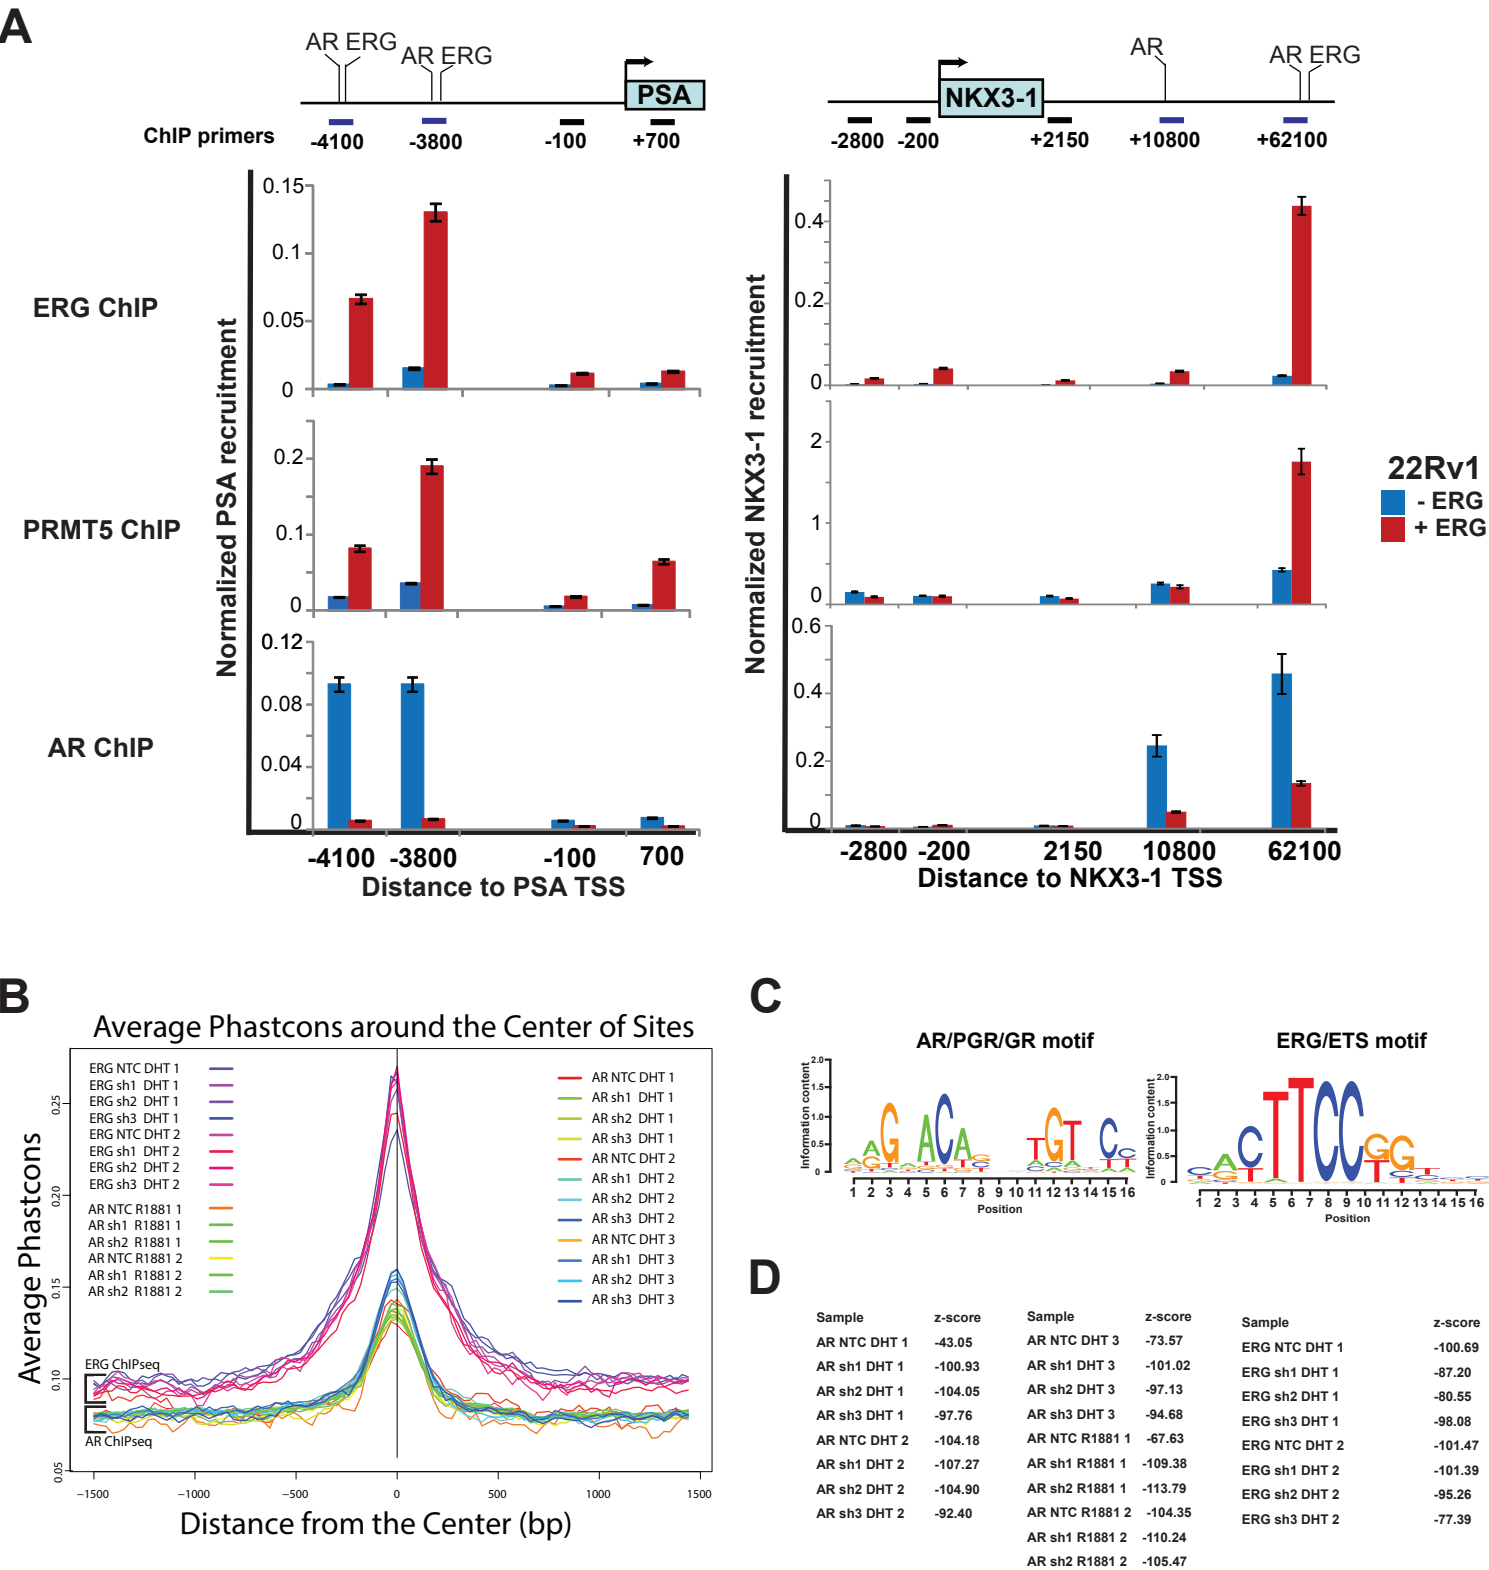

Supplement: supp [file elife-13964-supp-v2.zip]

Figure 4--figure supplement 1:  
AR R761K mutation effects in RWPE-1

A

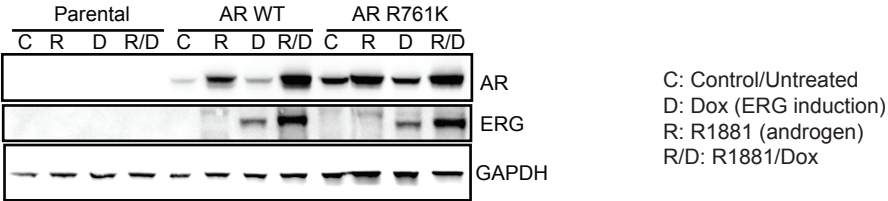

B

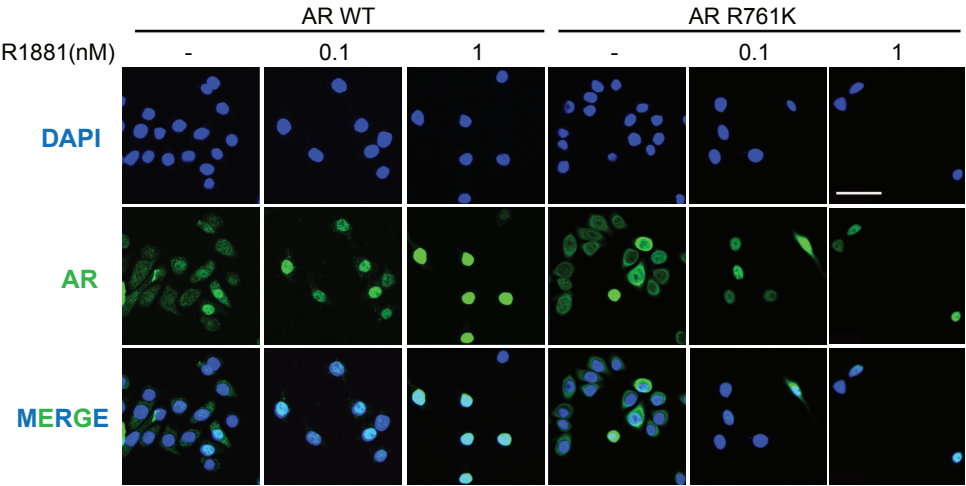

C

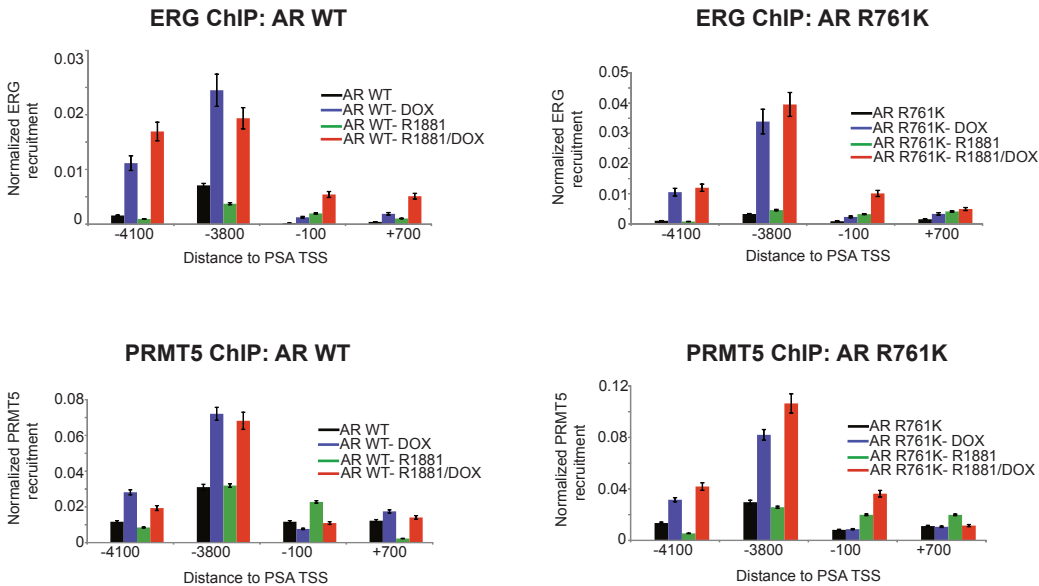

Supplement: supp [file elife-13964-supp-v2.zip]

Figure 1--figure supplement 1:  
PRMT5 knockdown in prostate cancer cells

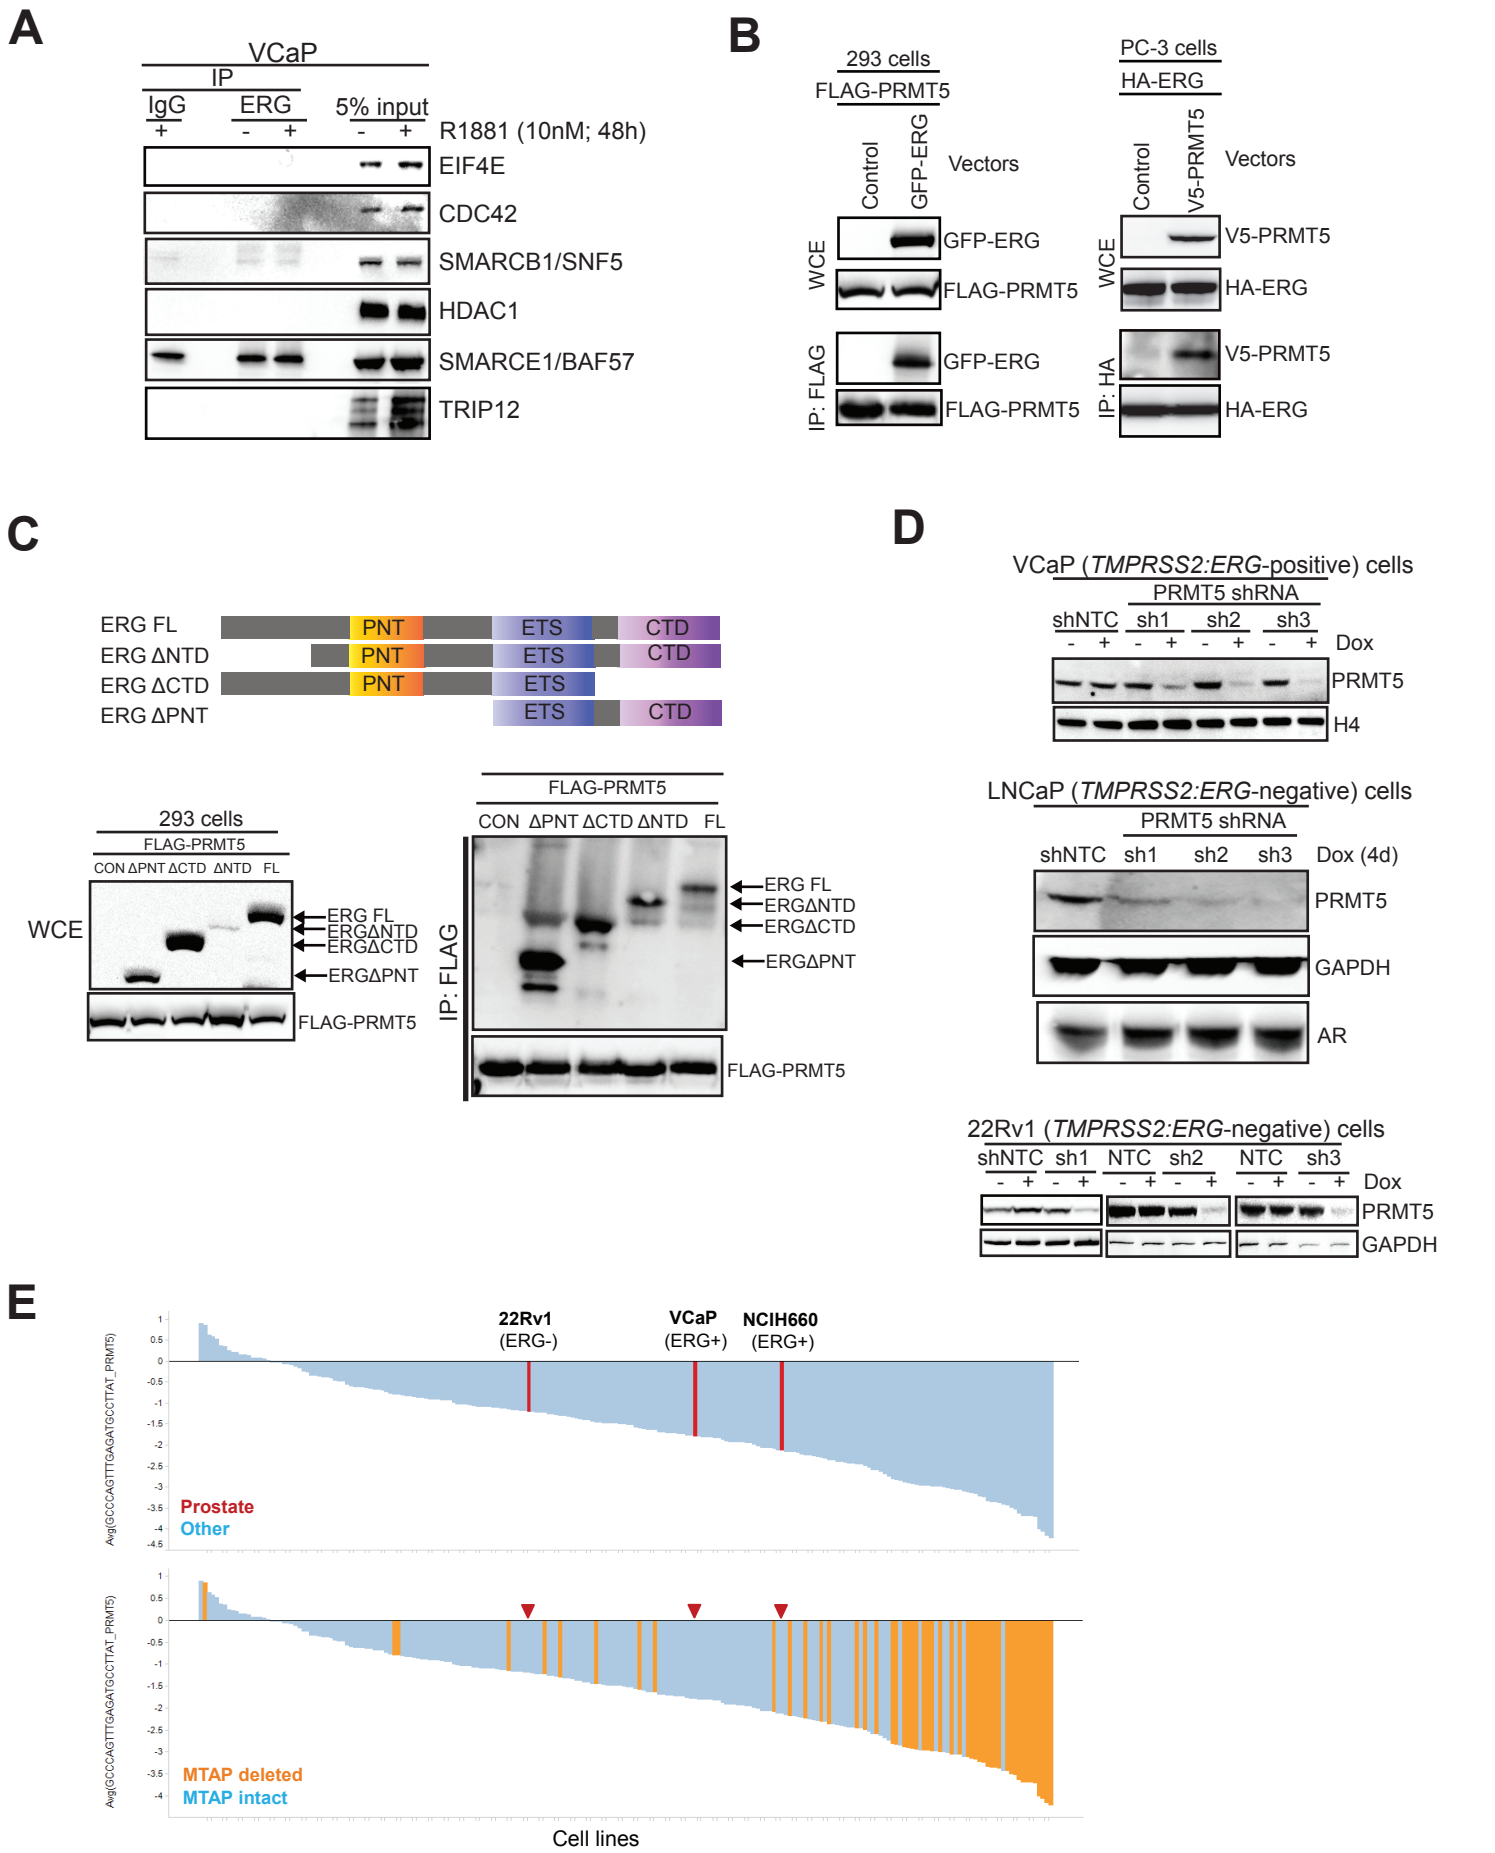

Supplement: supp [file elife-13964-supp-v2.zip]

Figure 3--figure supplement 1: H4R3me2s ChIP

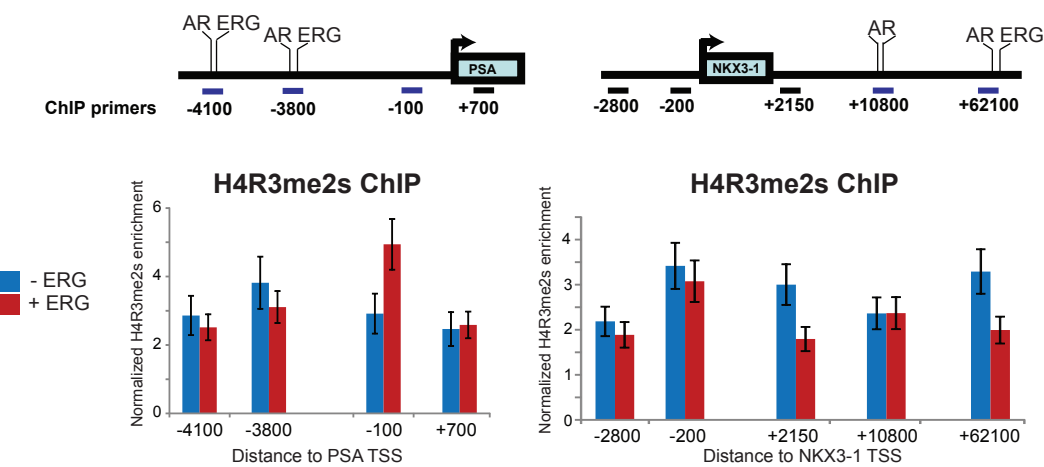

Supplement: supp [file elife-13964-supp-v2.zip]
